# Supplementary material for: Binuclear cobalt(ii) complexes: synthesis, structure, characterizations and catalytic applications in acceptor-less dehydrogenation (AD) of primary alcohols into aldehydes
Source: Royal Society of Chemistry journal article supplement (doi:10.1039/d3nj03632d), 2023-01-01
Supplement: d3nj03632d1.pdf [file d3nj03632d1.pdf]

# Supporting information

## **Binuclear Cobalt(II) complexes: Synthesis, structure, characterizations and catalytic applications in acceptorless dehydrogenation (AD) of primary alcohols into aldehydes**

Adelew Estifanos filkale<sup>1\*</sup>, Manoj Kumar Gangwar<sup>2</sup>, Indresh Kumar Pandey<sup>3</sup>, Ray Butcher<sup>4</sup>

<sup>1</sup>Department of Chemistry, College of Computational & Natural Sciences, Hawassa University, P.O. Box 05, Hawassa, Ethiopia.

<sup>2</sup>Department of Chemistry, Faculty of Science, University of Allahabad (AoU), Prayagraj–211002, Uttar Pradesh, India.

<sup>3</sup>Department of Chemistry, Deen Dayal Upadhyay Gorakhpur University, Gorakhpur–273009, Uttar Pradesh, India.

<sup>4</sup>Department of Inorganic & Structural Chemistry, Howard University Washington DC 20059, USA

\*Correspondence: Authors: \*E-mail: [adelewshenkora@gmail.com](mailto:adelewshenkora@gmail.com)

## Experimental Section:

Except where otherwise noted, all substances were commercially available and used in their natural state. Hexane, methanol, and ethyl acetate were obtained from commercial sources and used as reagent-grade solvents. Standard procedures were used to clean and degas the solvents.  $\text{CDCl}_3$  was used as the solvent for  $^1\text{H}$  NMR and  $^{13}\text{C}$   $\{^1\text{H}\}$  NMR measurements on Bruker 400 MHz and 500 MHz spectrometers. Coupling constants ( $J$ ) are expressed in Hz, and chemical shifts ( $\delta$ ) are expressed in ppm relative to TMS. Chemical shifts and solvent signals ( $\text{CDCl}_3$ ,  $\delta\text{C}$  77.0 ppm,  $\delta\text{H}$  7.26 ppm) that were used as references were converted to the TMS scale. Commercial aluminium sheets pre-coated with silica gel were used to monitor all of the reactions using analytical thin layer chromatography (TLC). Silica gel (200-400 mesh, Merck) was used for column chromatography. The abbreviations used for  $^1\text{H}$  NMR spectra to indicate the signal multiplicity are singlet (s), doublet (d), triplet (t), quartet (q), doublet of doublet (dd), doublet of triplet (dt), triplet of triplet (tt), multiplet (m), etc. The crystal data collection and refinement parameters are outlined in Tables 1 and 2. X-ray diffraction data were obtained using a Bruker P4 diffractometer outfitted with a SMART CCD detector. The structures were resolved by full-matrix least-squares procedures on FP 2 P with SHELXTL after being initially solved by direct methods and conventional difference map techniques (Version 6.10). P30P. On a Rigaku Hg 724+ diffractometer, X-ray diffraction data for binuclear cobalt(II) complexes (**1–3**) were gathered. By visiting [www.ccdc.cam.ac.uk/data\\_request/cif](http://www.ccdc.cam.ac.uk/data_request/cif), you can obtain these data from the Cambridge Crystallographic Data Center for free.

The FT-IR data for binuclear cobalt(II) complexes were captured using a Perkin-Elmer FT-IR 2000 spectrometer using KBr discs with a wavelength range of 4000–400  $\text{cm}^{-1}$ . The electronic spectra were captured using a Perkin Elmer Lambda 950 UV/VIS Spectrometer in

Dichloromethane (CH<sub>2</sub>Cl<sub>2</sub>) solvent. Micromass Q-Tof and Bruker Maxis Impact Spectrometers were used for the mass spectrometry measurements. An electrochemistry system made by PAR called the model 273A was used to measure cyclic voltammetry. Three electrodes a working platinum disc (2 mm), auxiliary electrodes, and a saturated Calomel Electrode (SCE) were used. Thermo Finnigan FLASH EA 1112 SERIES (CHNS) Elemental Analyzer was used to perform the elemental analysis. A Quantum Design MPMS XL-5 SQUID magnetometer was used to perform variable temperature susceptibility measurements on ground polycrystalline samples of binuclear cobalt(II) complexes **1** and **2** in the temperature range 5-300 K with an applied magnetic field of 0.1 Ton. Using tables of Pascal's constants, the susceptibility data were adjusted for the sample holders previously measured under the same circumstances and for the contributions of the sample's diamagnetic field.

## **1. Experimental Procedures and Characterizations**

**1.1 General procedure (A) for binuclear Co(II) catalysed acceptorless dehydrogenation (AD) of primary alcohols into aldehydes:** To an oven-dried reaction tube equipped with magnetic stir bar added Binuclear Co(II) catalyst-2 (6.4 mg, 0.005 mmol, 1 mol%), KOH (1.4 mg, 0.025 mmol, 5 mol%) and primary alcohol (54.0 mg, 0.5 mmol, 1 eq) followed by addition of 2 mL of toluene under nitrogen atmosphere. The closed reaction tube containing the reaction mixture was placed in a preheated oil bath and stirred at 80°C for 24 hours. After completion of the reaction time, the reaction mixture was cooled down to room temperature. The crude mixture was purified by flash column chromatography using silica gel as stationary phase and hexane/ethyl acetate (95:5 v/v) as an eluent to afford the pure ketone product **5a** as colorless oil in 90 % (47.7 mg) yield.

## 1.2 Characterization of all catalysis compounds:

### Benzaldehyde (5a):

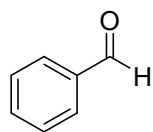

Compound **5a** was prepared according to the general procedure **A** from its corresponding alcohol (54.0 mg, 0.5 mmol, 1 eq) and the reaction mixture was purified by flash column chromatography (5% EtOAc/Hexane) to afford **5a** as colorless oil in 90 % (47.7 mg) yield. The NMR data of **5a** is in accordance with the literature.<sup>[1-2]</sup>

<sup>1</sup>H NMR (600 MHz, CDCl<sub>3</sub>): δ 9.97 (s, 1H), 7.97 (dd, J = 161.2, 7.7 Hz, 2H), 7.60 – 7.39 (m, 3H).

<sup>13</sup>C {<sup>1</sup>H} NMR (151 MHz, CDCl<sub>3</sub>): δ 192.21, 135.98, 134.13, 129.36, 128.62.

### Terephthalaldehyde (5b):

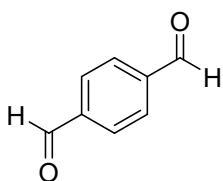

Compound **5b** was prepared according to the general procedure **A** from its corresponding di-alcohol (69.0 mg, 0.5 mmol, 1 eq) and the reaction mixture was purified by flash column chromatography (5% EtOAc/Hexane) to afford **5b** as white crystalline powder in 92 % (65.3 mg) yield. The NMR data of **5b** is in accordance with the literature.<sup>[3]</sup>

<sup>1</sup>H NMR (600 MHz, CDCl<sub>3</sub>): δ 10.05 (s, 2H), 7.96 (s, 4H).

<sup>13</sup>C {<sup>1</sup>H} NMR (151 MHz, CDCl<sub>3</sub>): δ 191.57, 139.96, 130.07.

### 4-hydroxybenzaldehyde (5c):

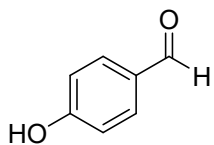

Compound **5c** was prepared according to the general procedure **A** from its corresponding alcohol (62.0 mg, 0.5 mmol, 1 eq) and the reaction mixture was purified by flash column chromatography (5% EtOAc/Hexane) to afford **5c** as yellow powder in 94 % (57.3 mg) yield. The NMR data of **5c** is in accordance with the literature.<sup>[1-2]</sup>

**<sup>1</sup>H NMR** (600 MHz, CDCl<sub>3</sub>): δ 9.85 (s, 1H), 7.81 (d, J = 7.2 Hz, 2H), 6.98 (d, J = 7.2 Hz, 2H), 1.89 (s, 1H).

**<sup>13</sup>C {<sup>1</sup>H} NMR** (151 MHz, CDCl<sub>3</sub>): δ 191.42, 161.94, 132.56, 129.62, 116.03.

### 3-methoxybenzaldehyde (**5d**):

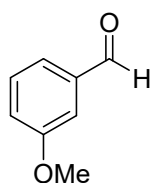

Compound **5d** was prepared according to the general procedure **A** from its corresponding alcohol (69.0 mg, 0.5 mmol, 1 eq) and the reaction mixture was purified by flash column chromatography (5% EtOAc/Hexane) to afford **5d** as colorless oil in 98 % (66.6 mg) yield. The NMR data of **5d** is in accordance with the literature.<sup>[2]</sup>

**<sup>1</sup>H NMR** (600 MHz, CDCl<sub>3</sub>): δ 9.93 (s, 1H), 7.45 – 7.32 (m, 3H), 7.13 (d, J = 7.7 Hz, 1H), 3.80 (s, 3H).

**<sup>13</sup>C {<sup>1</sup>H} NMR** (151 MHz, CDCl<sub>3</sub>): δ 191.84, 159.73, 137.41, 129.65, 122.97, 120.95, 111.89, 54.95.

### 4-chlorobenzaldehyde (**5e**):

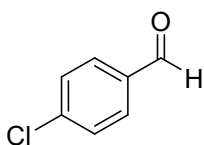

Compound **5e** was prepared according to the general procedure **A** from its corresponding alcohol (71.0 mg, 0.5 mmol, 1 eq) and the reaction mixture was purified by flash column chromatography (5% EtOAc/Hexane) to afford **5e** as light yellow crystalline powder in 78 % (54.6 mg) yield. The NMR data of **5e** is in accordance with the literature.<sup>[2]</sup>

**<sup>1</sup>H NMR** (600 MHz, CDCl<sub>3</sub>): δ 9.97 (s, 1H), 7.80 (d, J = 8.2 Hz, 2H), 7.47 (d, J = 8.2 Hz, 2H).

**<sup>13</sup>C {<sup>1</sup>H} NMR** (151 MHz, CDCl<sub>3</sub>): δ 190.75, 140.72, 134.70, 130.82, 129.34.

### 5-bromo-2-hydroxybenzaldehyde (**5f**):

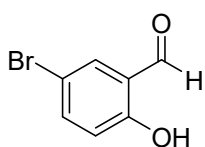

Compound **5f** was prepared according to the general procedure **A** from its corresponding alcohol (101 mg, 0.5 mmol, 1 eq) and the reaction mixture

was purified by flash column chromatography (5% EtOAc/Hexane) to afford **5f** as pale yellow solid in 72 % (72.0 mg) yield. The NMR data of **5f** is in accordance with the literature.<sup>[2]</sup>

**<sup>1</sup>H NMR** (600 MHz, CDCl<sub>3</sub>): δ 10.91 (s, 1H), 9.82 (s, 1H), 7.60 (d, J = 42.4 Hz, 2H), 6.88 (s, 1H).

**<sup>13</sup>C {<sup>1</sup>H} NMR** (151 MHz, CDCl<sub>3</sub>): δ 195.28, 160.33, 139.47, 135.45, 121.57, 119.63, 111.18.

### 3-nitrobenzaldehyde (**5g**):

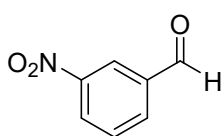

Compound **5h** was prepared according to the general procedure **A** from its corresponding alcohol (76.5 mg, 0.5 mmol, 1 eq) and the reaction mixture was purified by flash column chromatography (3% EtOAc/Hexane) to afford **5h** as brownish crystalline powder in 69 % (52.0 mg) yield. The NMR data of **5h** is in accordance with the literature.<sup>[1]</sup>

**<sup>1</sup>H NMR** (600 MHz, CDCl<sub>3</sub>): δ 10.05 (s, 1H), 8.57 (s, 1H), 8.38 (d, J = 8.2 Hz, 1H), 8.18 (d, J = 7.7 Hz, 1H), 7.74 (t, J = 7.9 Hz, 1H).

**<sup>13</sup>C {<sup>1</sup>H} NMR** (151 MHz, CDCl<sub>3</sub>): δ 189.76, 148.36, 137.07, 134.68, 130.23, 128.22, 123.80.

### 2-hydroxy-5-nitrobenzaldehyde (**5h**):

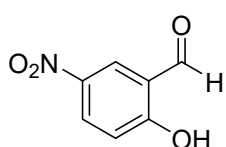

Compound **5g** was prepared according to the general procedure **A** from its corresponding alcohol (84.5 mg, 0.5 mmol, 1 eq) and the reaction mixture was purified by flash column chromatography (3% EtOAc/Hexane) to afford **5g** as reddish yellow powder in 74 % (61.7 mg) yield. The NMR data of **5g** is in accordance with the literature.<sup>[1]</sup>

**<sup>1</sup>H NMR** (600 MHz, CDCl<sub>3</sub>): δ 11.59 (s, 1H), 10.00 (s, 1H), 8.56 (s, 1H), 8.38 (d, J = 9.0 Hz, 1H), 7.11 (d, J = 9.0 Hz, 1H).

$^{13}\text{C}$   $\{^1\text{H}\}$  NMR (151 MHz,  $\text{CDCl}_3$ ):  $\delta$  13C NMR (151 MHz,  $\text{CDCl}_3$ )  $\delta$  195.52, 166.04, 140.53, 131.58, 129.70, 119.33, 118.91.

### 1-naphthaldehyde (**5i**):

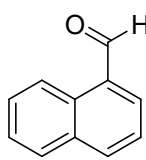

Compound **5i** was prepared according to the general procedure **A** from its corresponding alcohol (79.0 mg, 0.5 mmol, 1 eq) and the reaction mixture was purified by flash column chromatography (5% EtOAc/Hexane) to afford **5i** as white solid in 88 % (68.6 mg) yield. The NMR data of **5i** is in accordance with the literature.<sup>[1]</sup>

$^1\text{H}$  NMR (600 MHz,  $\text{CDCl}_3$ ):  $\delta$  10.22 (s, 1H), 9.17 (d,  $J = 8.7$  Hz, 1H), 7.86 (d,  $J = 8.3$  Hz, 1H), 7.73 (d,  $J = 7.7$  Hz, 2H), 7.55 (t,  $J = 7.6$  Hz, 1H), 7.44 (t,  $J = 7.4$  Hz, 1H), 7.38 (t,  $J = 7.6$  Hz, 1H).

$^{13}\text{C}$   $\{^1\text{H}\}$  NMR (151 MHz,  $\text{CDCl}_3$ ):  $\delta$  193.21, 136.31, 134.84, 133.22, 130.81, 130.00, 128.69, 128.10, 126.51, 124.41.

### 2-naphthaldehyde (**5j**):

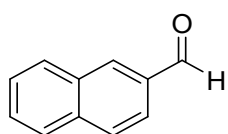

Compound **5j** was prepared according to the general procedure **A** from its corresponding alcohol (79.0 mg, 0.5 mmol, 1 eq) and the reaction mixture was purified by flash column chromatography (5% EtOAc/Hexane) to afford **5j** as pink crystalline solid in 89 % (69.4 mg) yield. The NMR data of **5j** is in accordance with the literature.<sup>[1]</sup>

$^1\text{H}$  NMR (600 MHz,  $\text{CDCl}_3$ ):  $\delta$  10.02 (s, 1H), 8.11 (s, 1H), 7.83 (dd,  $J = 14.7, 7.8$  Hz, 2H), 7.75 (s, 2H), 7.52 (s, 1H), 7.46 (s, 1H).

$^{13}\text{C}$   $\{^1\text{H}\}$  NMR (151 MHz,  $\text{CDCl}_3$ ):  $\delta$  191.72, 135.91, 134.07, 133.62, 132.14, 129.09, 128.67, 128.59, 127.63, 126.65, 122.20.

### Furan-2-carbaldehyde (**5k**):

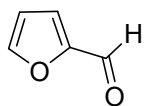

Compound **5k** was prepared according to the general procedure **A** from its corresponding alcohol (49.0 mg, 0.5 mmol, 1 eq) and the reaction mixture was purified by flash column chromatography (5% EtOAc/Hexane) to afford **5k** as colorless liquid in 63 % (30.2 mg) yield. The NMR data of **5k** is in accordance with the literature.<sup>[2]</sup>

<sup>1</sup>H NMR (600 MHz, CDCl<sub>3</sub>): δ 9.67 (s, 1H), 7.71 (s, 1H), 7.27 (s, 1H), 6.62 (s, 1H).

<sup>13</sup>C {<sup>1</sup>H} NMR (151 MHz, CDCl<sub>3</sub>): δ 177.88, 152.87, 148.07, 121.10, 112.54.

#### **Thiophene-2-carbaldehyde (5l):**

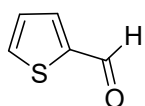

Compound **5l** was prepared according to the general procedure **A** from its corresponding alcohol (57.0 mg, 0.5 mmol, 1 eq) and the reaction mixture was purified by flash column chromatography (5% EtOAc/Hexane) to afford **5l** as colorless liquid in 61 % (34.2 mg) yield. The NMR data of **5l** is in accordance with the literature.<sup>[2]</sup>

<sup>1</sup>H NMR (600 MHz, CDCl<sub>3</sub>): δ 9.94 (s, 1H), 7.82 – 7.73 (m, 2H), 7.21 (s, 1H), 2.20 (s, 1H).

<sup>13</sup>C {<sup>1</sup>H} NMR (151 MHz, CDCl<sub>3</sub>): δ 182.98, 143.99, 136.29, 135.10, 128.28.

### **Analytical data for all the compounds:**



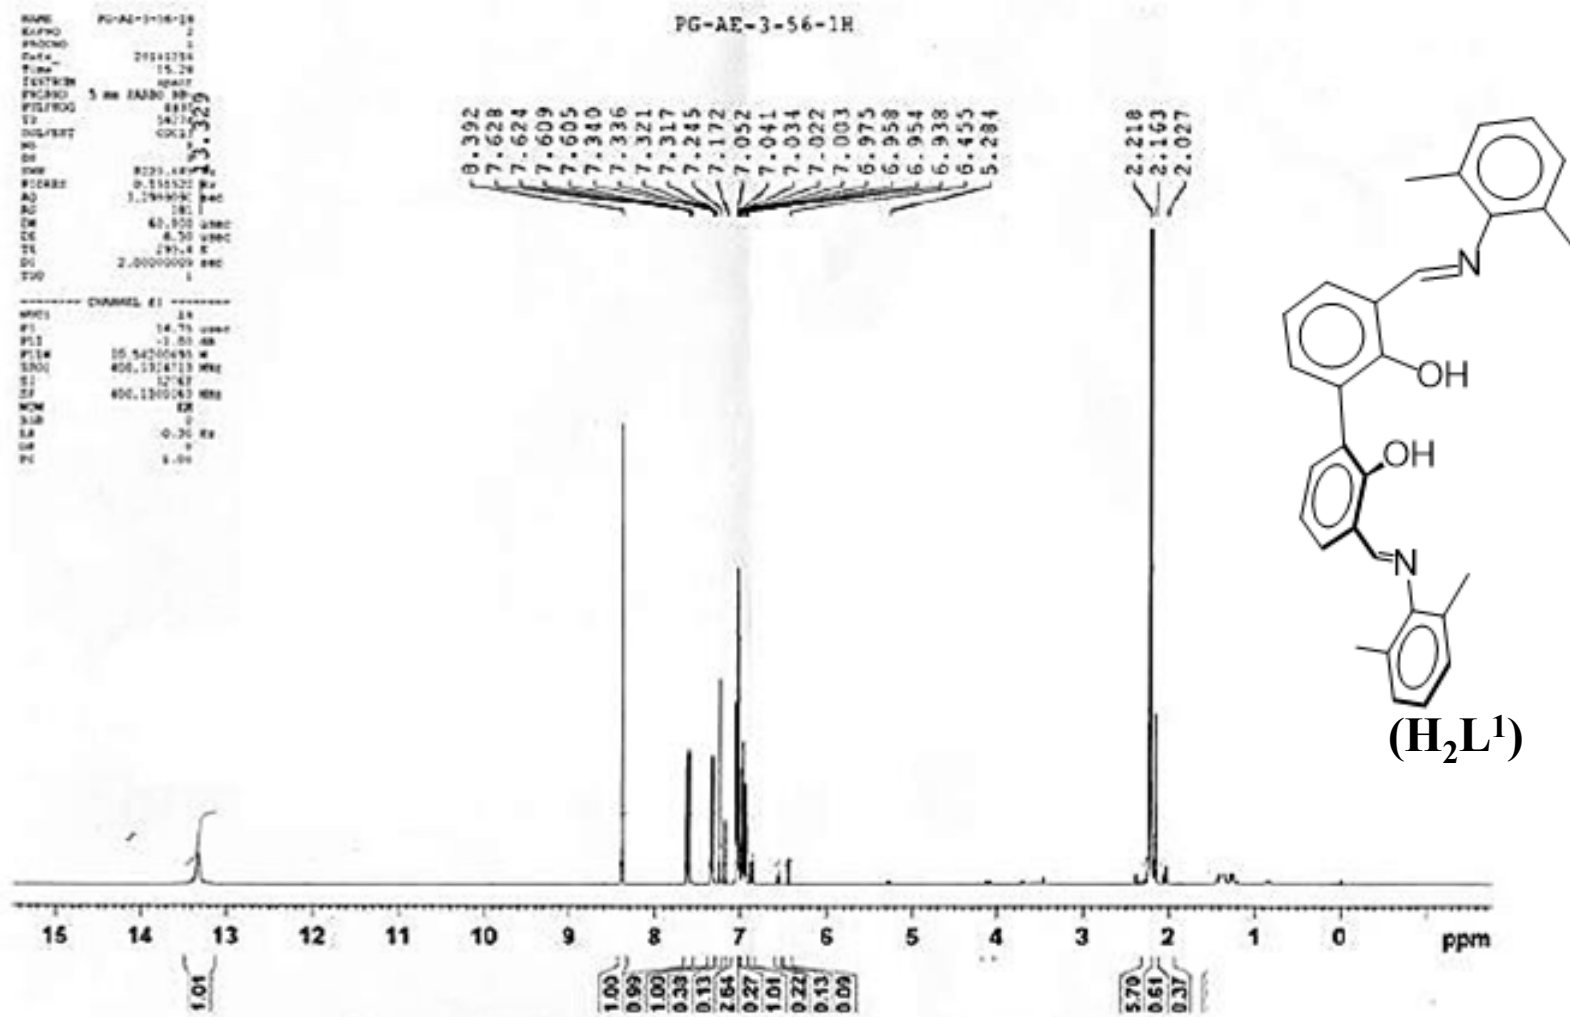

Figure S1. <sup>1</sup>H NMR spectrum of the H<sub>2</sub>L<sup>1</sup> in CDCl<sub>3</sub>.

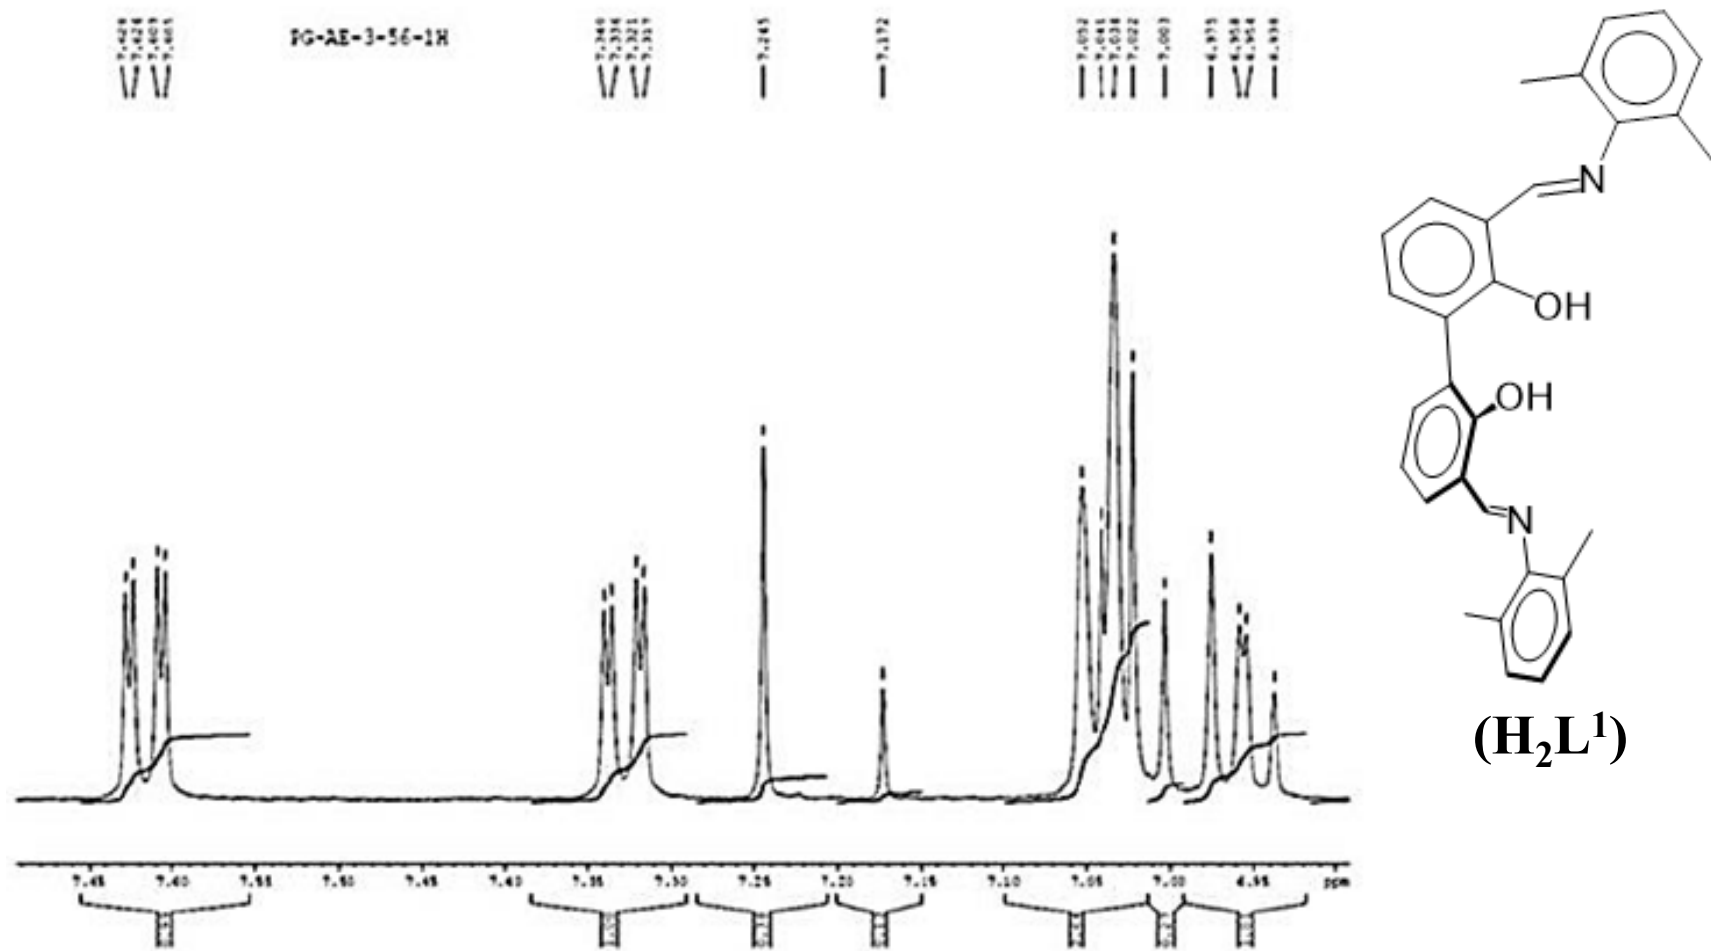

Figure S2. Expanded  $^1\text{H}$  NMR spectrum of the  $\text{H}_2\text{L}^1$  in  $\text{CDCl}_3$ .

DEPARTMENT OF CHEMISTRY, I.I.T.(B)

Analysis Info

Analysis Name D:\Data\DEC-14\PG-AE-3-50-1.d  
 Method Tune\_pos\_NAICSI-1000.m  
 Sample Name PG-AE-3-50-1  
 Comment C30H28N2O2

Acquisition Date 12/23/2014 6:48:04 PM

Operator PG CS IN  
 Instrument maXis impact 282001.00081

Acquisition Parameter

|             |          |                       |            |                  |           |
|-------------|----------|-----------------------|------------|------------------|-----------|
| Source Type | ESI      | Ion Polarity          | Positive   | Set Nebulizer    | 0.3 Bar   |
| Focus       | Active   | Set Capillary         | 3800 V     | Set Dry Heater   | 180 °C    |
| Scan Begin  | 50 m/z   | Set End Plate Offset  | -500 V     | Set Dry Gas      | 4.0 l/min |
| Scan End    | 1000 m/z | Set Collision Cell RF | 1500.0 Vpp | Set Divert Valve | Source    |

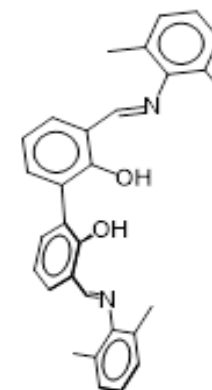

(H<sub>2</sub>L<sup>1</sup>)

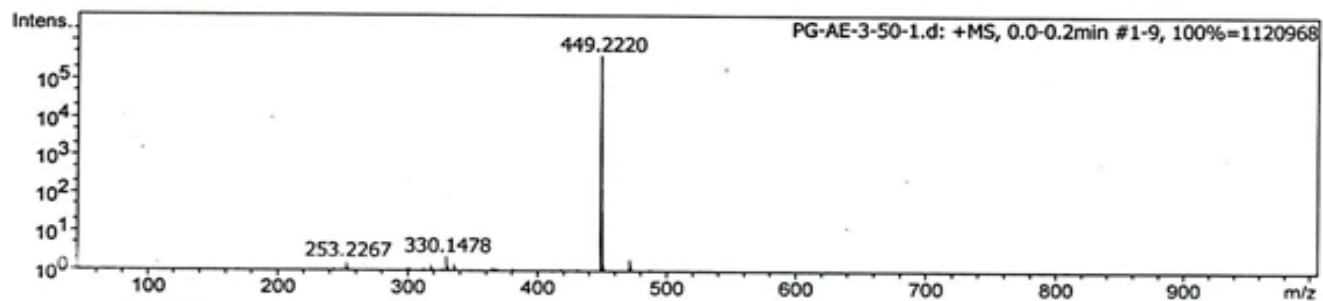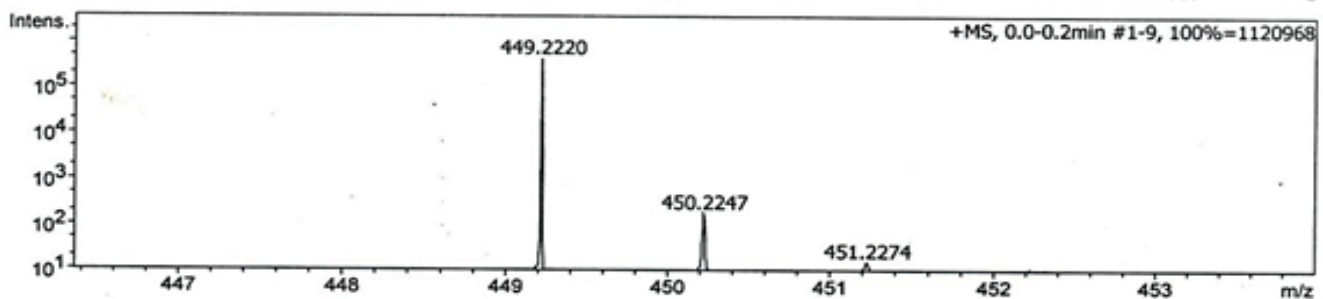

| Meas. m/z | # | Ion Formula | m/z      | err [ppm] | mSigma | # Sigma | Score  | rdb  | e <sup>-</sup> Conf | N-Rule |
|-----------|---|-------------|----------|-----------|--------|---------|--------|------|---------------------|--------|
| 449.2220  | 1 | C30H29N2O2  | 449.2224 | -0.7      | 32.6   | 1       | 100.00 | 17.5 | even                | ok     |

Figure S3. HRMS spectrum of the H<sub>2</sub>L<sup>1</sup> in CHCl<sub>3</sub>.

DEPARTMENT OF CHEMISTRY, I.I.T.(B)

Analysis Info  
 Analysis Name D:\Data\DEC-14\PG-AE-3-51-1.d  
 Method Tune\_pos\_NAICSI-3000.m  
 Sample Name PG-AE-3-51-1  
 Comment C60H52Co2N4O4

Acquisition Date 12/23/2014 6:54:25 PM  
 Operator PG CS IN  
 Instrument maXis impact 282001.00081

Acquisition Parameter

|             |          |                       |            |                  |           |
|-------------|----------|-----------------------|------------|------------------|-----------|
| Source Type | ESI      | Ion Polarity          | Positive   | Set Nebulizer    | 0.3 Bar   |
| Focus       | Active   | Set Capillary         | 3800 V     | Set Dry Heater   | 180 °C    |
| Scan Begin  | 50 m/z   | Set End Plate Offset  | -500 V     | Set Dry Gas      | 4.0 l/min |
| Scan End    | 2500 m/z | Set Collision Cell RF | 2100.0 Vpp | Set Divert Valve | Source    |

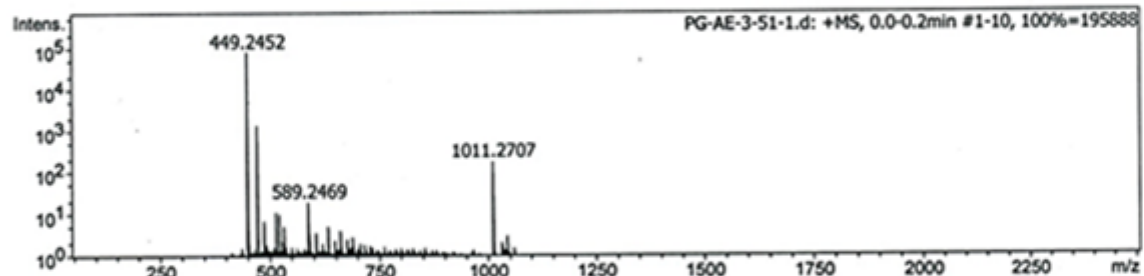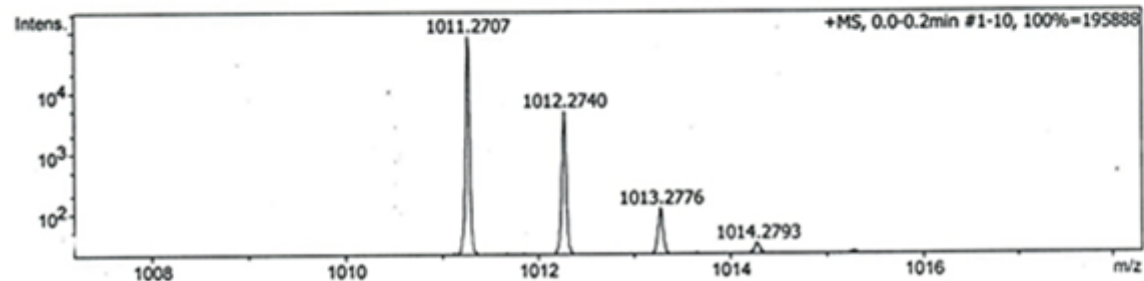

| Meas. m/z | # | Ion Formula   | m/z       | err [ppm] | mSigma | # Sigma | Score  | rdb  | e <sup>-</sup> Conf | N-Rule |
|-----------|---|---------------|-----------|-----------|--------|---------|--------|------|---------------------|--------|
| 1011.2707 | 1 | C60H53Co2N4O4 | 1011.2725 | 1.8       | 11.5   | 1       | 100.00 | 36.5 | even                | ok     |

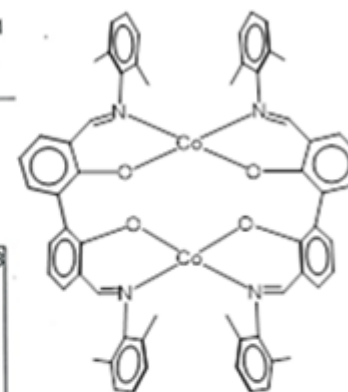

(1)

Figure S4. HRMS spectrum of the  $[Co(II)H_2L]$  complex-1 in  $CHCl_3$ .

# Eager 300 Report

Page: 1 Sample: PG-AE-3-51-2 (PG-AE-3-51-2)

Method Name : PG-SRM-15122014  
Method File : D:\CHNS-2014\PG-SRM-15122014.mth  
Chromatogram : PG-AE-3-51-2  
Operator ID : Sonali  
Analysed : 12/15/2014 16:16  
Sample ID : PG-AE-3-51-2 (# 19)  
Analysis Type : UnkNown (Area)

Calib. method : using 'K Factors'

!!! Warning missing one or more peaks.

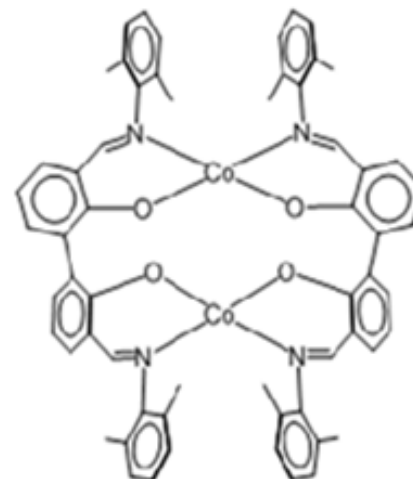

(1)

| Element Name | %       | Ret.Time | Area    | BC | Area ratio | K factor    |
|--------------|---------|----------|---------|----|------------|-------------|
| Nitrogen     | 5.2540  | 43       | 74913   | FU | 29.875300  | .149112E+07 |
| 2            | 0.0000  | 57       | 265722  | FU |            | 0.0000      |
| Carbon       | 71.7856 | 66       | 2238051 | FU | 1.000000   | .275501E+07 |
| Hydrogen     | 5.2458  | 181      | 456530  | RS | 4.902309   | .707107E+07 |
| Totals       | 82.2854 |          | 3035216 |    |            |             |

Figure S5. CHN analysis of the [Co(II)H<sub>2</sub>L<sup>1</sup>] complex-1.

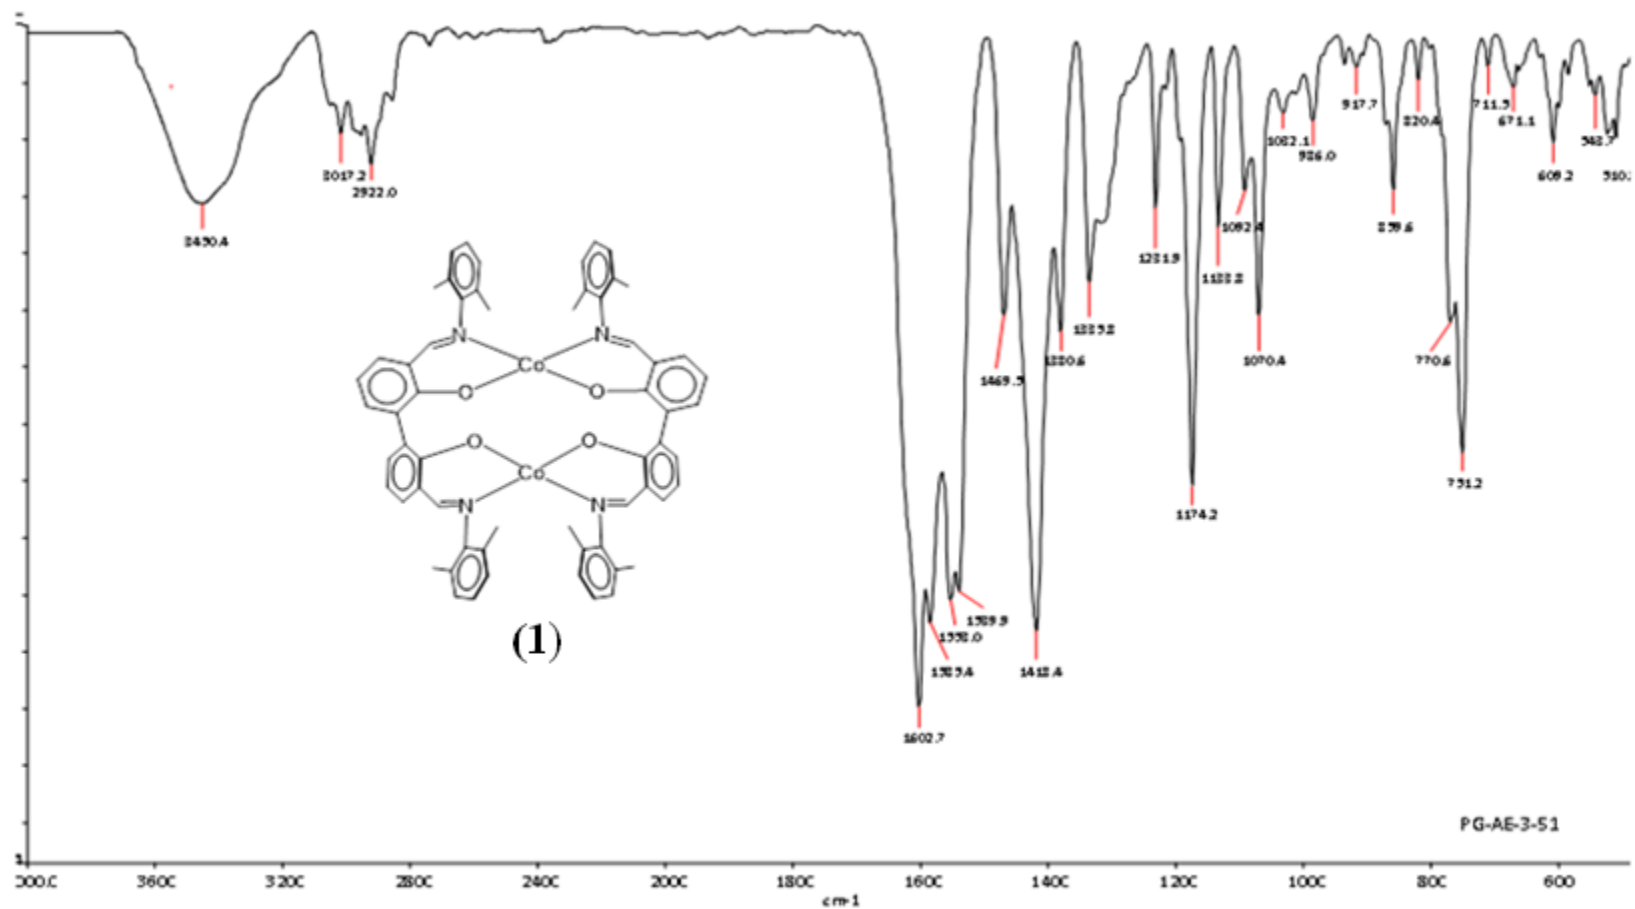

Figure S6. FT-IR spectrum of the [Co(II)H<sub>2</sub>L<sup>1</sup>] complex-1.

Current Data Parameters  
NAME PG-AE-2-62-1H  
EXPNO 1  
PROCNO 1

PG-AE-2-62-1H

F2 - Acquisition Parameters  
Date\_ 20131105  
Time 22.58  
INSTRUM spect  
PROBHD 5 mm PABBO BB/  
PULPROG zg30  
TD 65536  
SOLVENT CDCl3  
NS 16  
DS 2  
SWH 10000.000 KHz  
FIDRES 0.152588 Hz  
AQ 3.2767999 sec  
RG 33.93  
DW 50.000 usec  
DE 6.50 usec  
TE 297.6 K  
D1 1.00000000 sec  
TDO 1

----- CHANNEL f1 -----  
SFO1 500.1330885 MHz  
NUC1 1H  
P1 13.00 usec  
PLW1 13.00000000 W

F2 - Processing parameters  
SI 65536  
SF 500.1299725 MHz  
WDW EM  
SSB 0  
LB 0.30 Hz  
GB 0  
PC 1.00

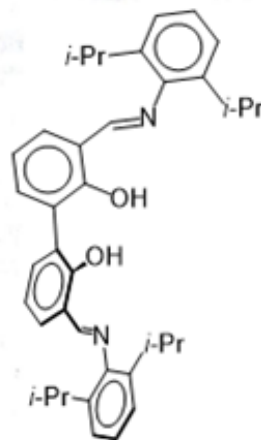

( $H_2L^2$ )

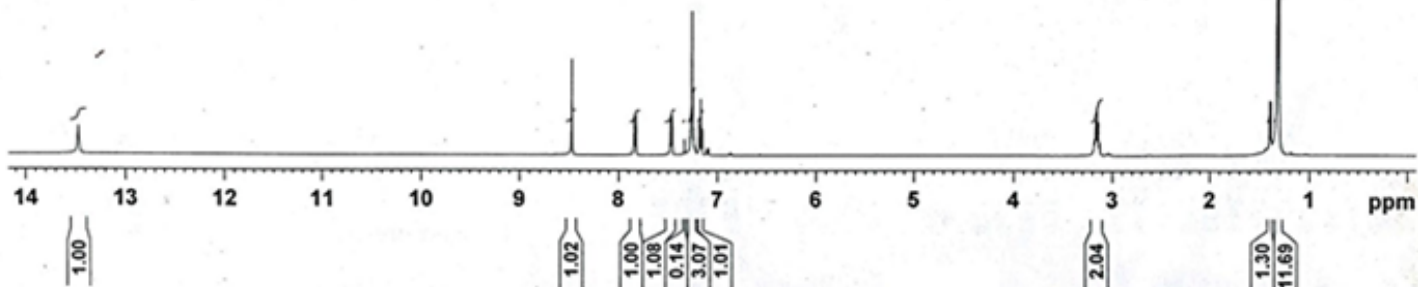

Figure S7.  $^1H$  NMR spectrum of the ligand  $H_2L^2$  in  $CDCl_3$ .

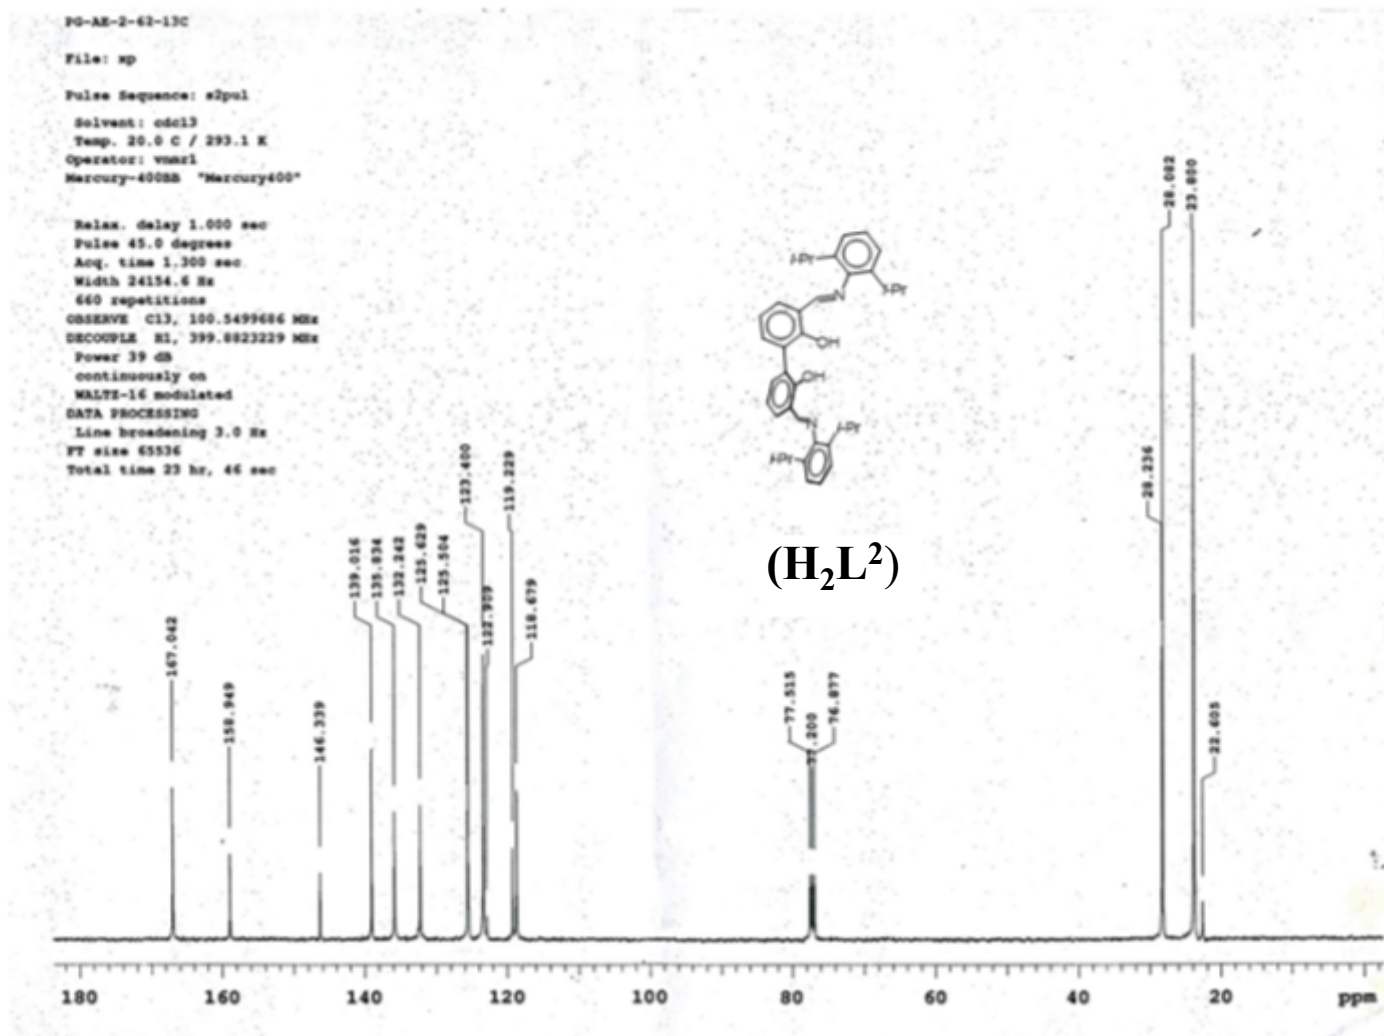

Figure S8.  $^{13}C\{^1H\}$  NMR spectrum of the ligand  $H_2L^2$  in  $CDCl_3$ .



## Indian Institute of Technology (B)

### Analysis Info

Analysis Name D:\Data\OCT-13\PG-AE-2-62.d  
 Method Tune\_pos\_Standard\_NAI-1000.m  
 Sample Name PG-AE-2-62  
 Comment C38H44N2O2

Acquisition Date 10/3/2013 6:21:24 PM

Operator VKS IN  
 Instrument maXis impact 282001.00081

### Acquisition Parameter

|             |          |                       |           |                  |           |
|-------------|----------|-----------------------|-----------|------------------|-----------|
| Source Type | ESI      | Ion Polarity          | Positive  | Set Nebulizer    | 0.3 Bar   |
| Focus       | Active   | Set Capillary         | 3500 V    | Set Dry Heater   | 180 °C    |
| Scan Begin  | 50 m/z   | Set End Plate Offset  | -500 V    | Set Dry Gas      | 4.0 l/min |
| Scan End    | 1000 m/z | Set Collision Cell RF | 400.0 Vpp | Set Divert Valve | Source    |

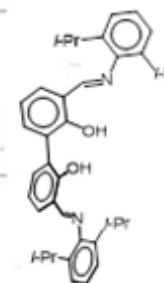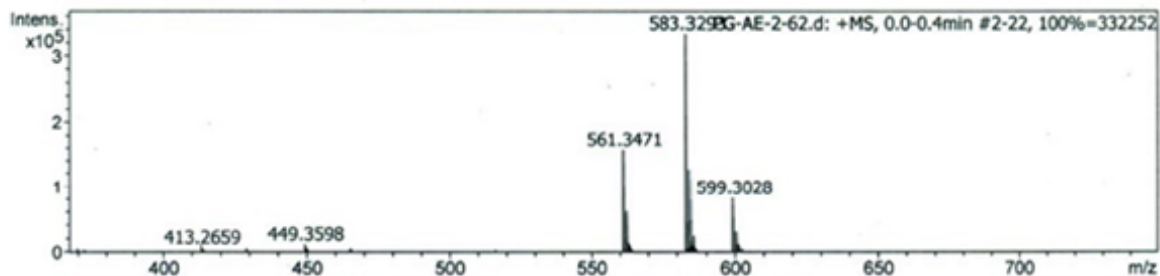

$(H_2L^2)$

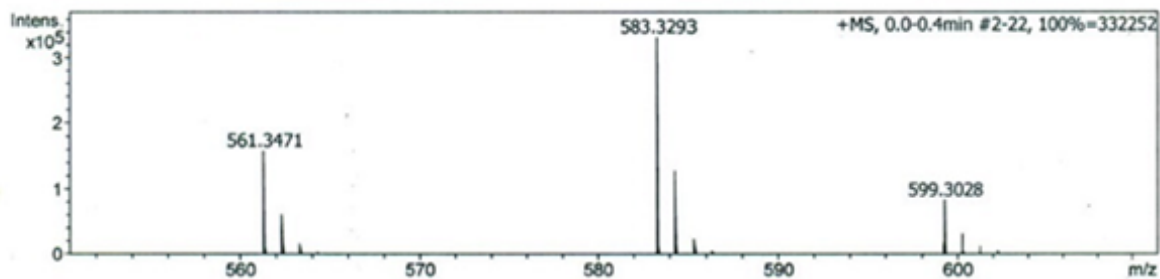

| Meas. m/z | # | Ion Formula  | m/z      | err [ppm] | mSigma | # Sigma | Score  | rdb  | e <sup>-</sup> Conf | N-Rule |
|-----------|---|--------------|----------|-----------|--------|---------|--------|------|---------------------|--------|
| 583.3293  | 1 | C38H44N2NaO2 | 583.3295 | 0.4       | 22.7   | 1       | 100.00 | 17.5 | even                | ok     |

Figure S9. HRMS spectrum of the ligand  $H_2L^2$  in  $CHCl_3$ .

Indian Institute of Technology (B)

**Analysis Info**  
 Analysis Name D:\Data\OCT-13\PG-AE-2-78-1.d  
 Method Tune\_pos\_Standard\_NAI-2000.m  
 Sample Name PG-AE-2-78-1  
 Comment C76H84Co2N4O4

Acquisition Date 10/24/2013 11:16:08 PM  
 Operator PG CS IN  
 Instrument maXis impact 282001.00081

**Acquisition Parameter**

|             |          |                       |            |                  |           |
|-------------|----------|-----------------------|------------|------------------|-----------|
| Source Type | ESI      | Ion Polarity          | Positive   | Set Nebulizer    | 0.3 Bar   |
| Focus       | Active   | Set Capillary         | 3700 V     | Set Dry Heater   | 180 °C    |
| Scan Begin  | 50 m/z   | Set End Plate Offset  | -500 V     | Set Dry Gas      | 4.0 l/min |
| Scan End    | 2000 m/z | Set Collision Cell RF | 2100.0 Vpp | Set Divert Valve | Source    |

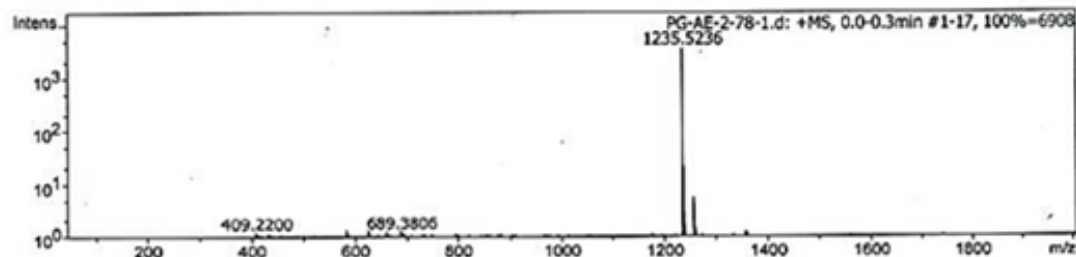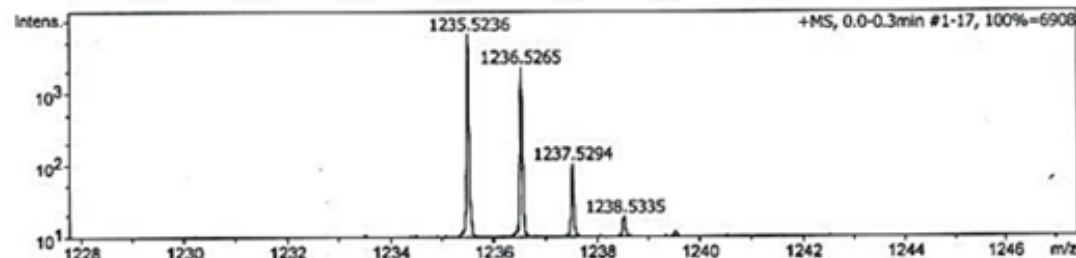

| Meas. m/z | # | Ion Formula   | m/z       | err [ppm] | mSigma | # Sigma | Score  | rdb  | e <sup>-</sup> Conf | N-Rule |
|-----------|---|---------------|-----------|-----------|--------|---------|--------|------|---------------------|--------|
| 1235.5236 | 1 | C76H85Co2N4O4 | 1235.5229 | 0.5       | 5.3    | 1       | 100.00 | 36.5 | even                | ok     |

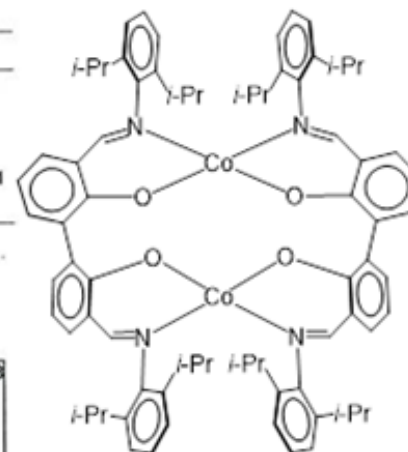

(2)

Figure S10. HRMS spectrum of the  $[Co(II)H_2L^2]$  complex-2 in  $CHCl_3$ .

SAIF-IIT BOMBAY

Operator ID: IIT-B  
 Company name: ThermoFinnigan  
 Method filename: C:\2013-2014-MTH\10-02-2014-chn.mth  
 Method name: Nitrogen/Carbon/Hydrogen/Sulphur  
 Analysed: 02/11/2014 15:21  
 Printed: 02-11-2014 15:31  
 Elemental Analyser method:  
 Sampler method:  
 Sample ID: 10-02-2014-045-PG-AE-2-78 (# 45)  
 Analysis type: UnkNown  
 Chromatogram filename: 10-02-2014-045-PG-AE-2-78.dat  
 Calibration method: K Factors  
 Sample weight: 2.459  
 Protein factor: 6.25

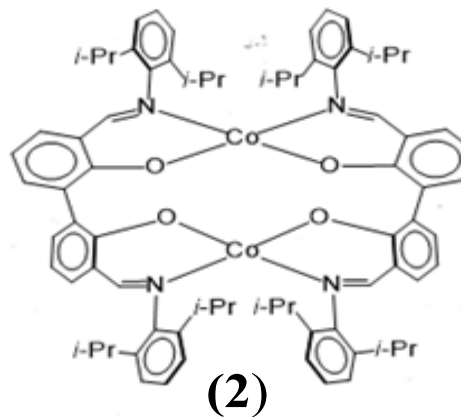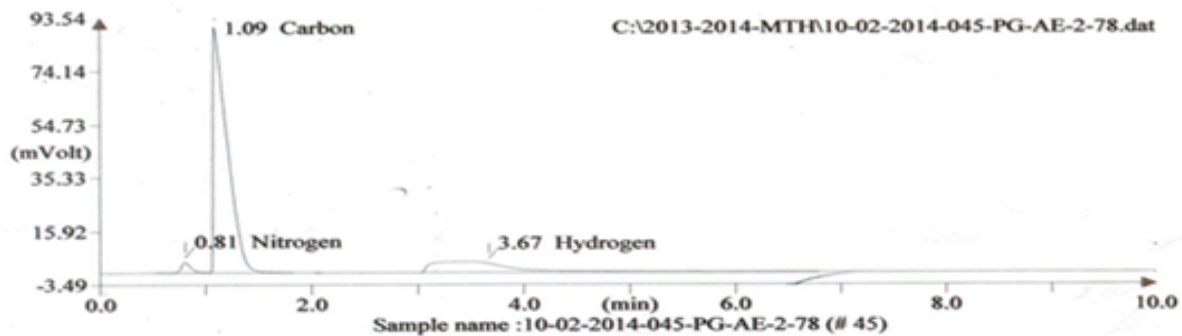

| Peak Number (#) | Retention Time (min) | Area (.1*uV*sec) | Element % | Component |
|-----------------|----------------------|------------------|-----------|-----------|
| 1               | 0.808                | 253276           | 4.227     | Nitrogen  |
| 2               | 1.092                | 8256418          | 73.305    | Carbon    |
| 3               | 3.667                | 2181225          | 6.652     | Hydrogen  |
|                 |                      | 10690920         | 84.184    |           |

Figure S11. CHN analysis of the  $[Co(II)H_2L^2]$  complex-2.

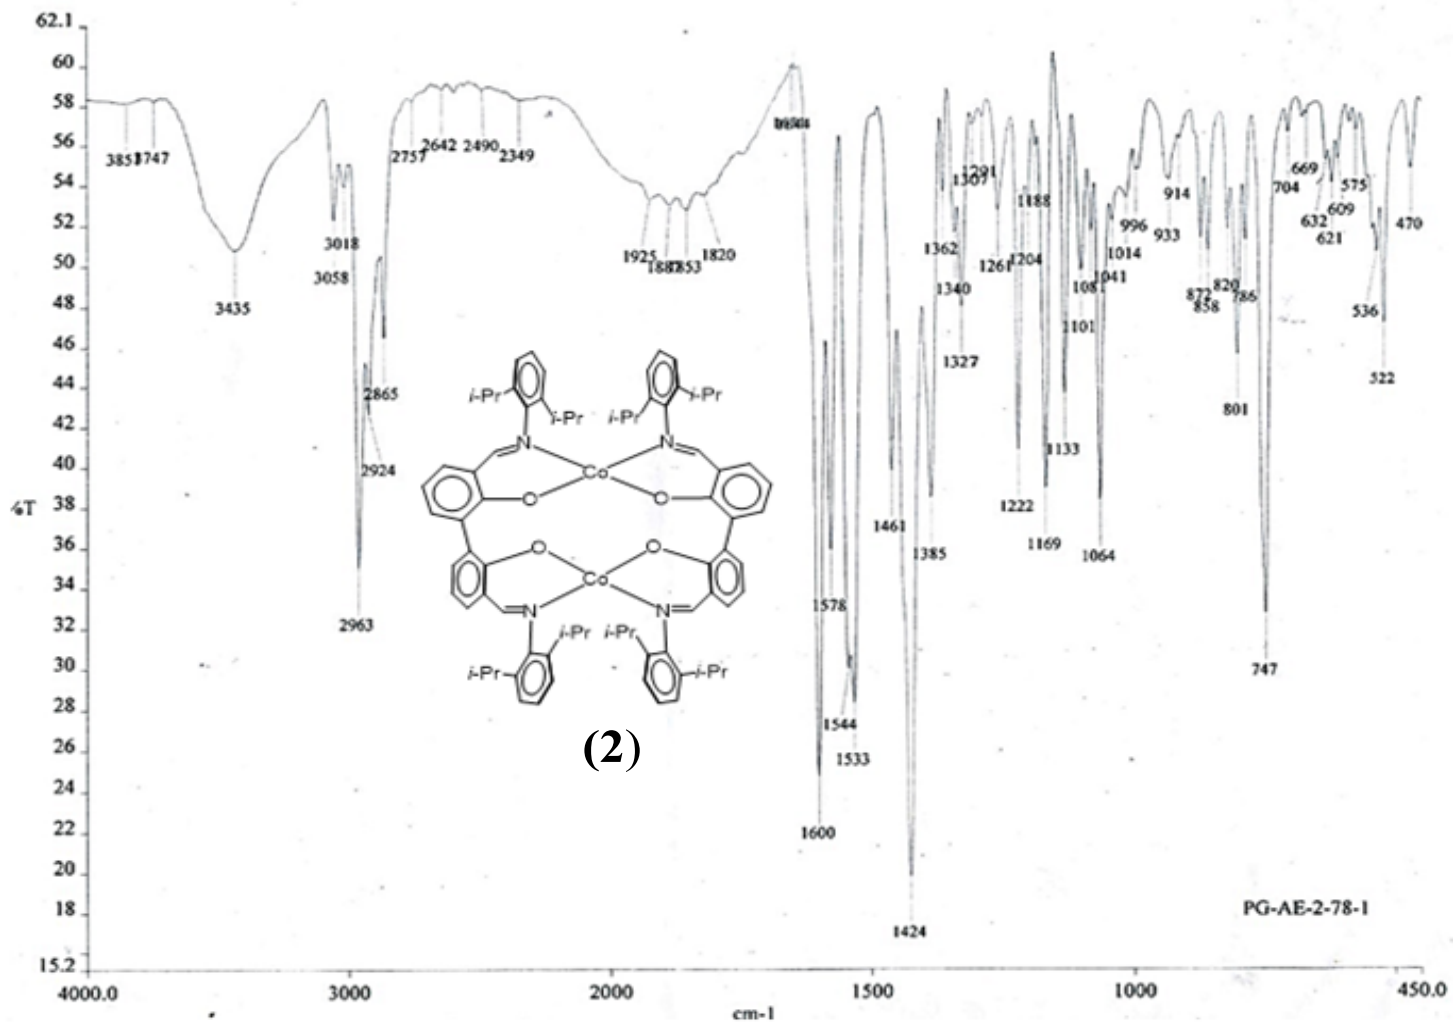

Figure S12. FT-IR spectrum of the [Co(II)H<sub>2</sub>L<sup>2</sup>] complex-2.

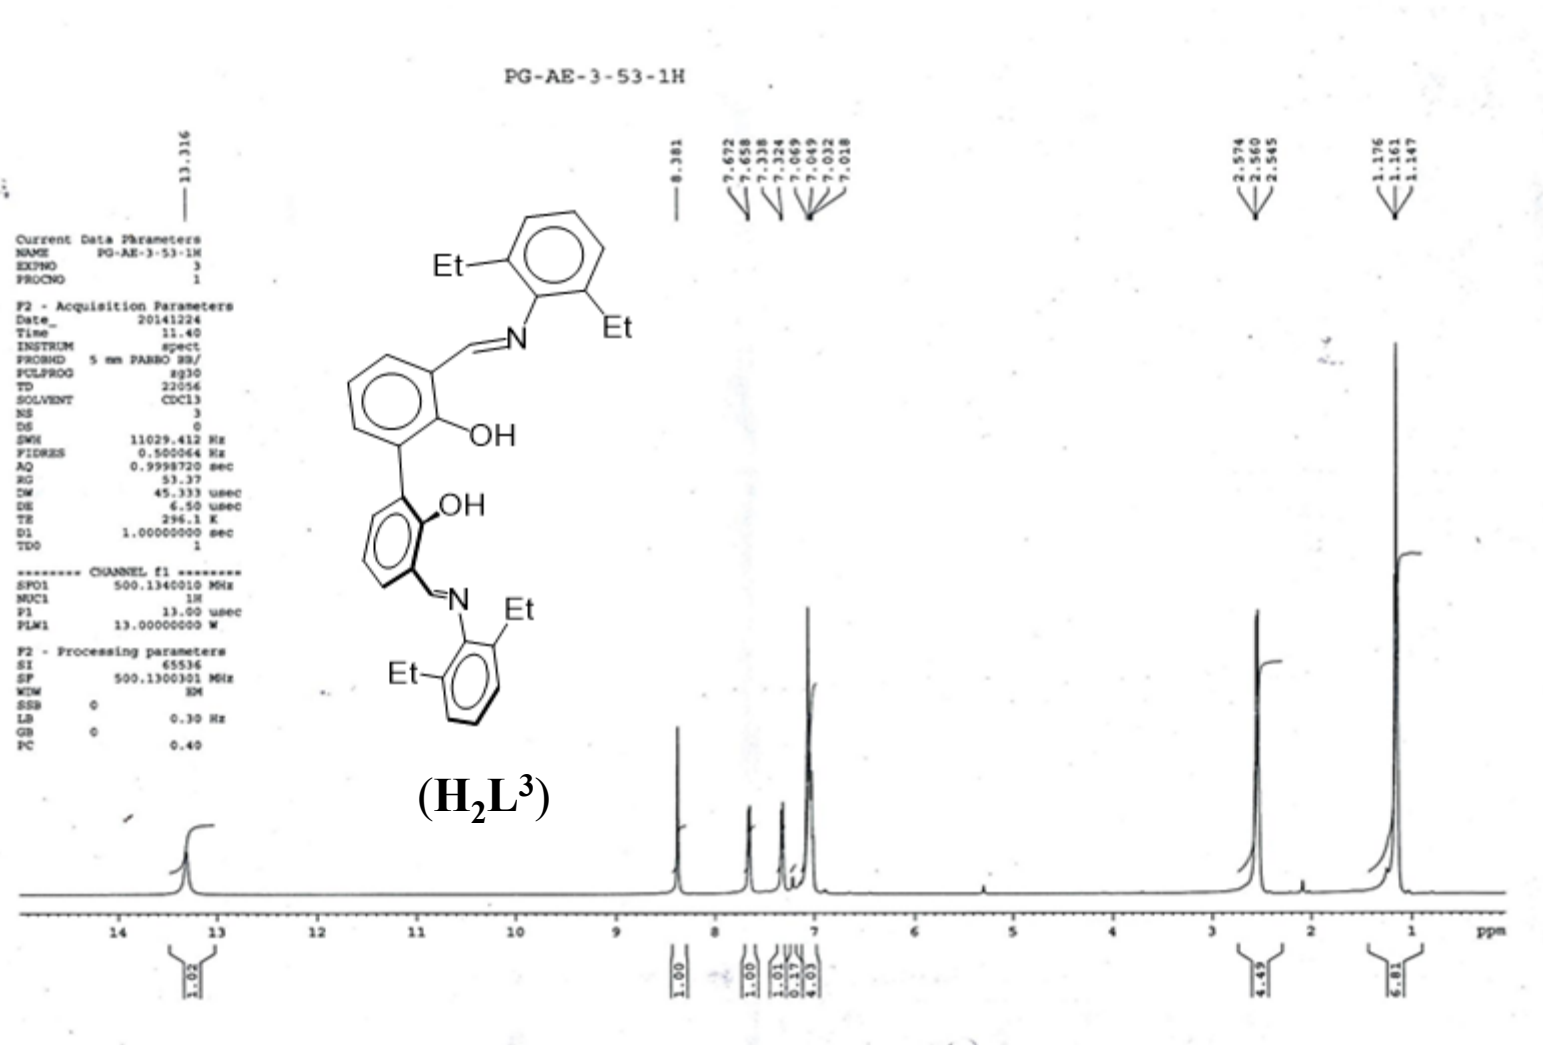

Figure S13. <sup>1</sup>H NMR spectrum of the ligand H<sub>2</sub>L<sup>3</sup> in CDCl<sub>3</sub>.

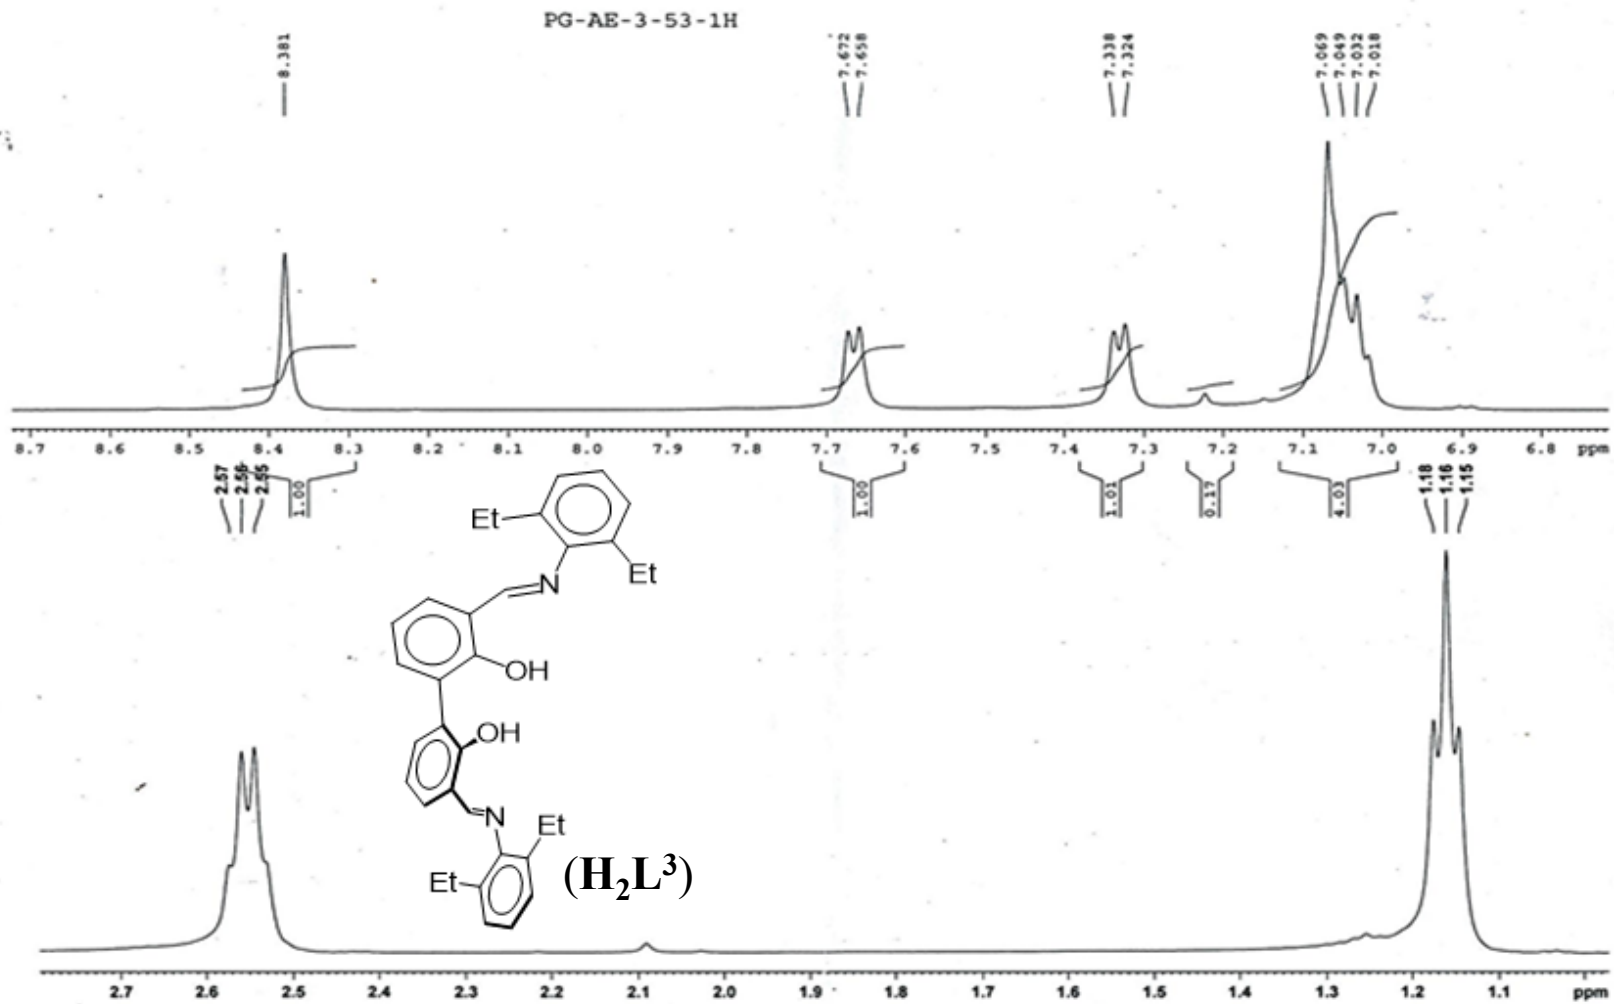

Figure S14. Expanded  $^1\text{H}$  NMR spectrum of the ligand  $\text{H}_2\text{L}^3$  in  $\text{CDCl}_3$ .

DEPARTMENT OF CHEMISTRY, I.I.T.(B)

Analysis Info

Analysis Name D:\Data\DEC-14\PG-AE-3-52-1.d  
 Method Tune\_pos\_NAICSI-1000.m  
 Sample Name PG-AE-3-52-1  
 Comment C34H36N2O2

Acquisition Date 12/23/2014 7:03:15 PM

Operator PG CS IN  
 Instrument maXis impact 282001.00081

Acquisition Parameter

|             |          |                       |            |                  |           |
|-------------|----------|-----------------------|------------|------------------|-----------|
| Source Type | ESI      | Ion Polarity          | Positive   | Set Nebulizer    | 0.3 Bar   |
| Focus       | Active   | Set Capillary         | 3800 V     | Set Dry Heater   | 180 °C    |
| Scan Begin  | 50 m/z   | Set End Plate Offset  | -500 V     | Set Dry Gas      | 4.0 l/min |
| Scan End    | 1000 m/z | Set Collision Cell RF | 1500.0 Vpp | Set Divert Valve | Source    |

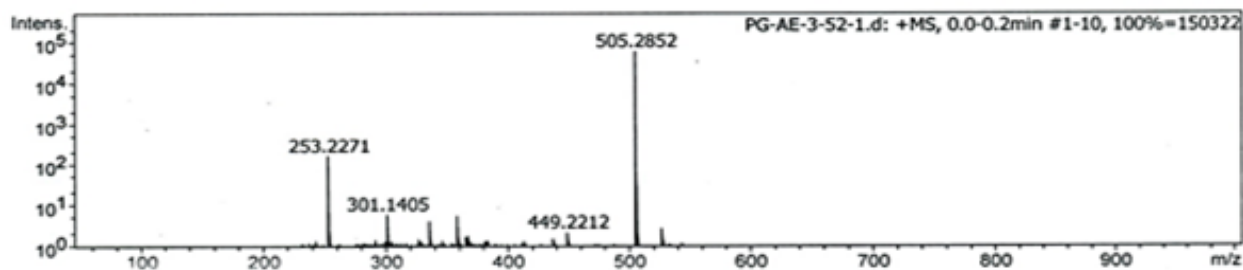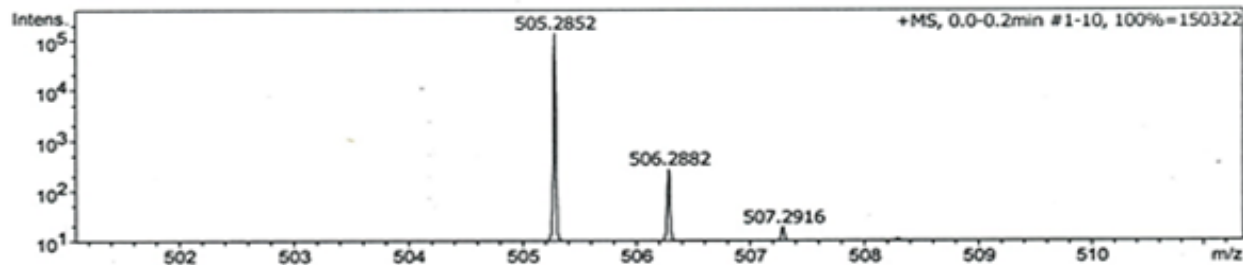

| Meas. m/z | # | Ion Formula | m/z      | err [ppm] | mSigma | # Sigma | Score  | rdb  | e <sup>-</sup> Conf | N-Rule |
|-----------|---|-------------|----------|-----------|--------|---------|--------|------|---------------------|--------|
| 505.2852  | 1 | C34H37N2O2  | 505.2850 | -0.4      | 16.9   | 1       | 100.00 | 17.5 | even                | ok     |

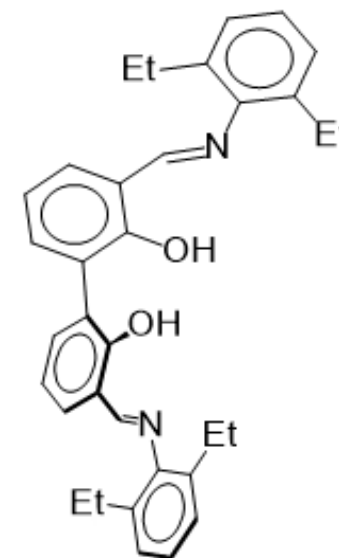

(H<sub>2</sub>L<sup>3</sup>)

Figure S15. HRMS spectrum of the ligand H<sub>2</sub>L<sup>3</sup> in CHCl<sub>3</sub>.

DEPARTMENT OF CHEMISTRY, I.I.T.(B)

Analysis Info

Analysis Name D:\Data\FEB 15\PG-AE-3-70-1.d  
 Method Tune\_pos\_NAICSI-2000.m  
 Sample Name PG-AE-3-70-1  
 Comment C68H68Co2O4N4

Acquisition Date 2/3/2015 6:19:04 PM

Operator PG CS IN  
 Instrument maXis impact 282001.00081

Acquisition Parameter

|             |          |                       |            |                  |           |
|-------------|----------|-----------------------|------------|------------------|-----------|
| Source Type | ESI      | Ion Polarity          | Positive   | Set Nebulizer    | 0.3 Bar   |
| Focus       | Active   | Set Capillary         | 3800 V     | Set Dry Heater   | 180 °C    |
| Scan Begin  | 50 m/z   | Set End Plate Offset  | -500 V     | Set Dry Gas      | 4.0 l/min |
| Scan End    | 2000 m/z | Set Collision Cell RF | 2100.0 Vpp | Set Divert Valve | Source    |

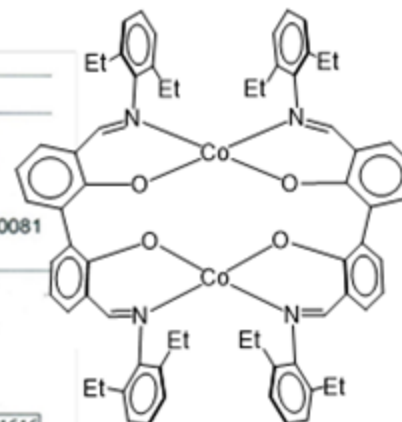

(3)

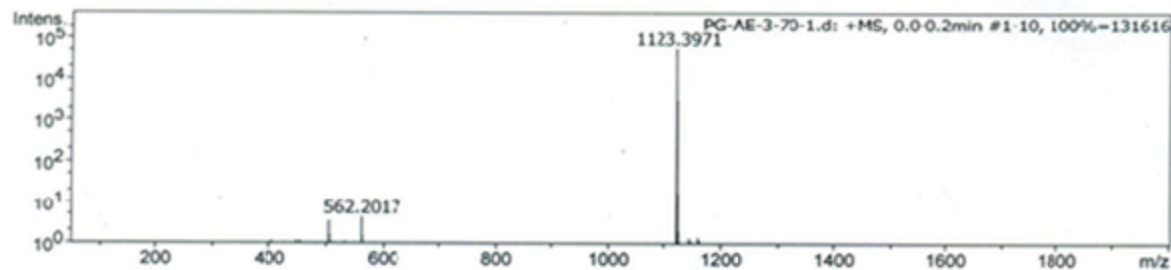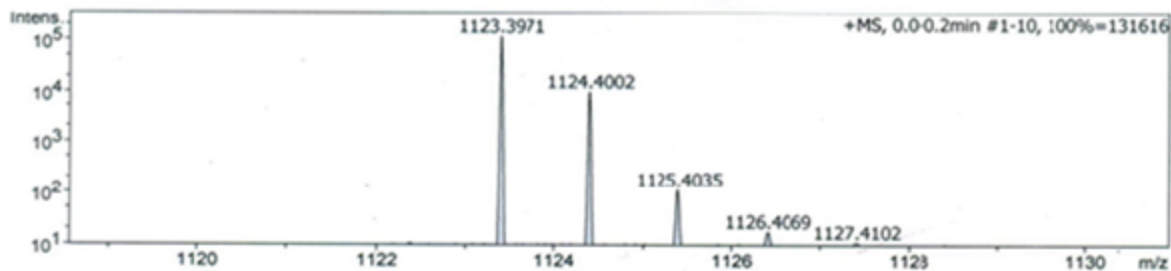

| Meas. m/z | # | Ion Formula   | m/z       | err [ppm] | mSigma | # Sigma | Score  | rdb  | e <sup>-</sup> Conf | N-Rule |
|-----------|---|---------------|-----------|-----------|--------|---------|--------|------|---------------------|--------|
| 1123.3971 | 1 | C68H69Co2N4O4 | 1123.3977 | 0.5       | 17.5   | 1       | 100.00 | 36.5 | even                | ok     |

Figure S16. HRMS spectrum of the  $[\text{Co}(\text{II})\text{H}_2\text{L}^3]$  complex-3 in  $\text{CHCl}_3$ .



SAIF-IIT BOMBAY

Operator ID: IIT-B  
 Company name: ThermoFinnigan  
 Method filename: C:\2013-2014-MTH\18-02-2015-chns.mth  
 Method name: Nitrogen/Carbon/Hydrogen/Sulphur  
 Analysed: 02/19/2015 14:43  
 Printed: 02-20-2015 17:13  
 Elemental Analyser method:  
 Sampler method:  
 Sample ID: 18-02-2015-044-3-70-ADELEW (# 44)  
 Analysis type: UnkNown  
 Chromatogram filename: 18-02-2015-044-3-70-ADELEW.dat  
 Calibration method: K Factors  
 Sample weight: 2.387  
 Protein factor: 6.25

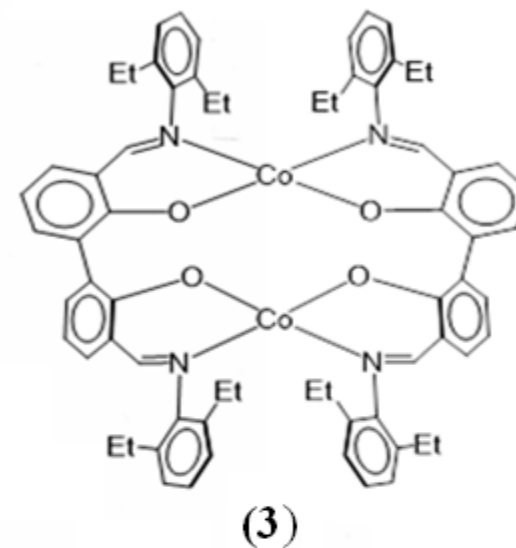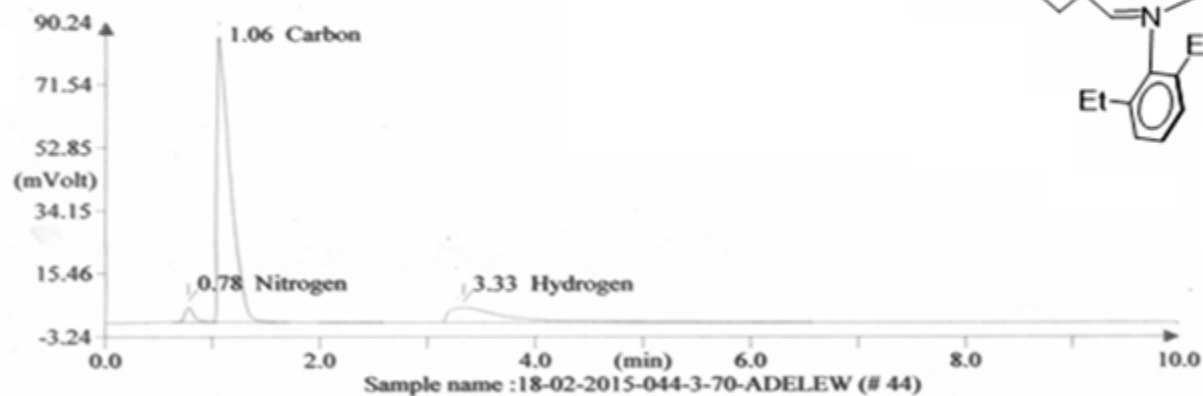

| Peak Number (#) | Retention Time (min) | Area (.1*uV*sec) | Element % | Component |
|-----------------|----------------------|------------------|-----------|-----------|
| 1               | 0.775                | 245603           | 4.945     | Nitrogen  |
| 2               | 1.058                | 7191069          | 73.735    | Carbon    |
| 3               | 3.333                | 1721110          | 6.218     | Hydrogen  |
|                 |                      | 9157782          | 84.898    |           |

Figure S17. CHN analysis of the [Co(II)H<sub>2</sub>L<sup>3</sup>] complex-3.

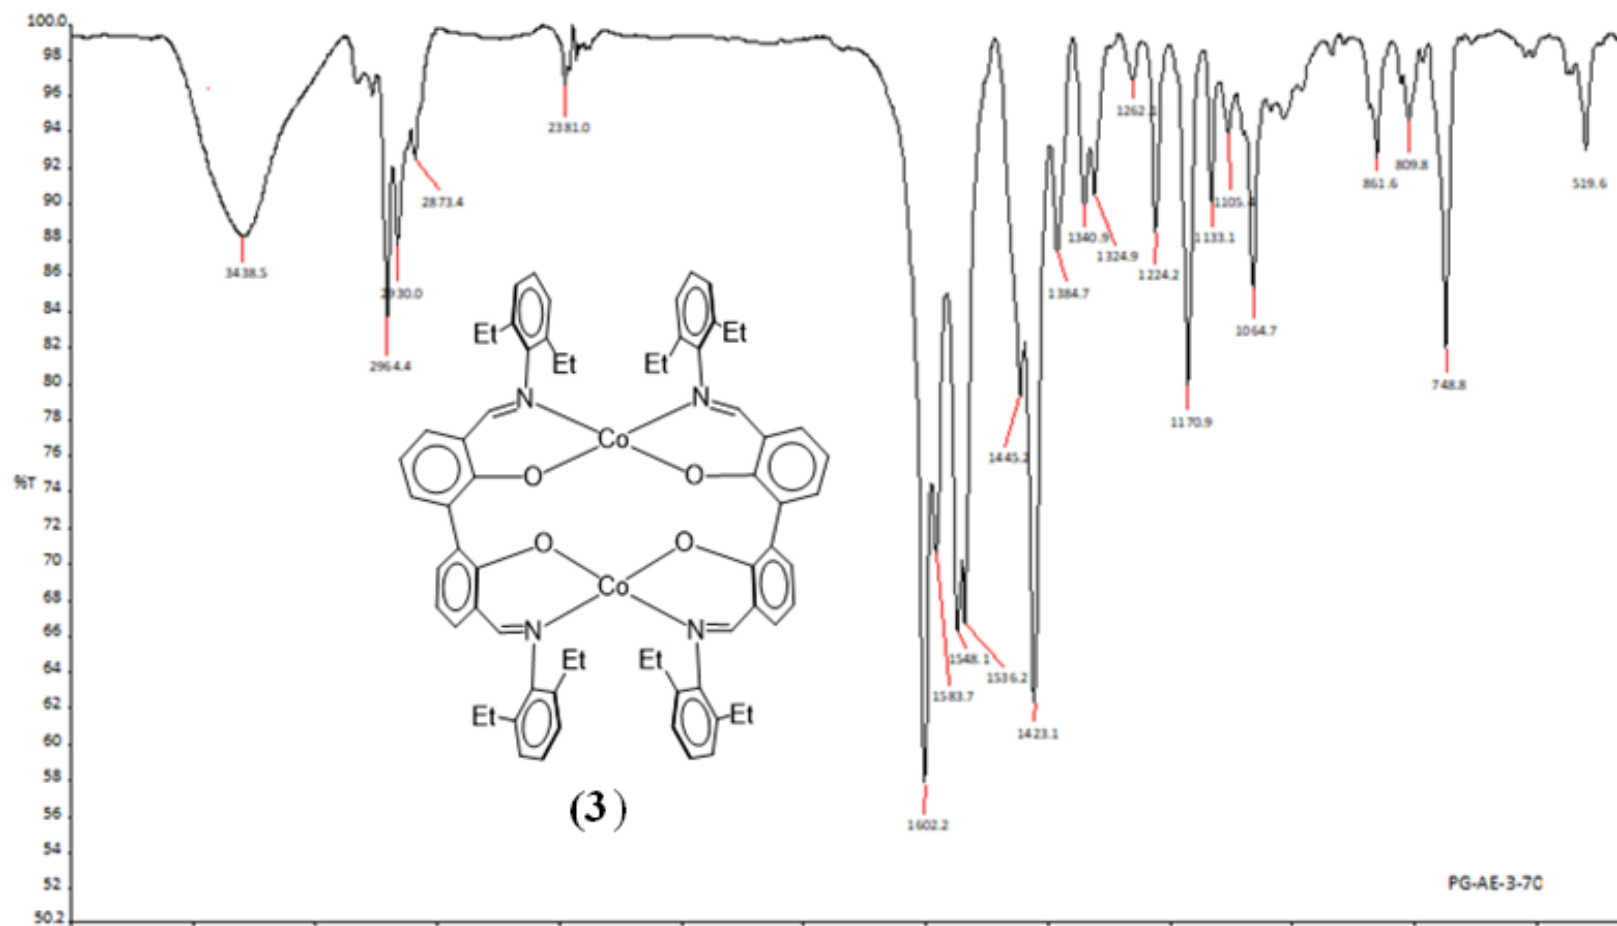

Figure S18. FT-IR spectrum of the [Co(II)H<sub>2</sub>L<sup>3</sup>] complex-3.

**Table 1 S19.** Important FT-IR bands of the ligand **H<sub>2</sub>L<sup>1</sup>** and binuclear Co(II) complexes (**1–3**)

| <b>Compounds</b>                           | <b><math>\nu(\text{O-H})/\text{H}_2\text{O}</math><br/>(<math>\text{cm}^{-1}</math>)</b> | <b><math>\nu(\text{C=N})</math><br/>(<math>\text{cm}^{-1}</math>)</b> | <b><math>\nu(\text{C-O})</math><br/>(<math>\text{cm}^{-1}</math>)</b> | <b><math>\nu(\text{C=C})</math><br/>(<math>\text{cm}^{-1}</math>)</b> |
|--------------------------------------------|------------------------------------------------------------------------------------------|-----------------------------------------------------------------------|-----------------------------------------------------------------------|-----------------------------------------------------------------------|
| <b>Ligand (H<sub>2</sub>L<sup>1</sup>)</b> | 3440                                                                                     | 1618                                                                  | 1203                                                                  | 1427                                                                  |
| <b>Co(II) complex-1</b>                    | 3446                                                                                     | 1599                                                                  | 1143                                                                  | 1421                                                                  |
| <b>Co(II) complex-2</b>                    | 3450                                                                                     | 1585                                                                  | 1174                                                                  | 1418                                                                  |
| <b>Co(II) complex-3</b>                    | 3435                                                                                     | 1600                                                                  | 1169                                                                  | 1424                                                                  |

**Table 2 S20.** UV–Visible spectra of ligands (**H<sub>2</sub>L<sup>1</sup>**, **H<sub>2</sub>L<sup>2</sup>** and **H<sub>2</sub>L<sup>3</sup>**) and binuclear cobalt(II) complexes (**1-3**)

| Compounds                                  | $\lambda_{\max}$ , nm | absorbance | $\epsilon$ , M <sup>-1</sup> cm <sup>-1</sup> | transitions             |
|--------------------------------------------|-----------------------|------------|-----------------------------------------------|-------------------------|
| <b>Ligand (H<sub>2</sub>L<sup>1</sup>)</b> | 257                   | 0.27       | 27000                                         | $\pi \rightarrow \pi^*$ |
|                                            | 350                   | 0.12       | 12000                                         | $n \rightarrow \pi^*$   |
| <b>Ligand (H<sub>2</sub>L<sup>2</sup>)</b> | 264                   | 0.26       | 26000                                         | $\pi \rightarrow \pi^*$ |
|                                            | 341                   | 0.11       | 11000                                         | $n \rightarrow \pi^*$   |
| <b>Ligand (H<sub>2</sub>L<sup>3</sup>)</b> | 263                   | 0.27       | 27000                                         | $\pi \rightarrow \pi^*$ |
|                                            | 350                   | 0.11       | 11000                                         | $n \rightarrow \pi^*$   |
| <b>Co(II) complex-1</b>                    | 236                   | 0.71       | 10,600                                        | $\pi \rightarrow \pi^*$ |
|                                            | 277                   | 0.33       | 4,900                                         | $n \rightarrow \pi^*$   |
|                                            | 410                   | 0.21       | 3,100                                         | $d \rightarrow \pi^*$   |
| <b>Co(II) complex-2</b>                    | 233                   | 0.78       | 11600                                         | $\pi \rightarrow \pi^*$ |
|                                            | 277                   | 0.36       | 5400                                          | $n \rightarrow \pi^*$   |
|                                            | 400                   | 0.21       | 3100                                          | $d \rightarrow \pi^*$   |
| <b>Co(II) complex-3</b>                    | 233                   | 0.84       | 12500                                         | $\pi \rightarrow \pi^*$ |
|                                            | 275                   | 0.39       | 5800                                          | $n \rightarrow \pi^*$   |
|                                            | 400                   | 0.22       | 3200                                          | $d \rightarrow \pi^*$   |

**Table 3 S21.** X-ray crystallographic data for the binuclear cobalt(II) complexes (1-3)

| <b>Compounds</b> | <b>Co(II) complex-1 (CH<sub>3</sub>CN.H<sub>2</sub>O)</b>                                                                     | <b>Co(II) complex-2 (CH<sub>2</sub>Cl<sub>2</sub>)</b>                                                         | <b>Co(II) complex-3 (CH<sub>3</sub>CN)</b>                                                                     |
|------------------|-------------------------------------------------------------------------------------------------------------------------------|----------------------------------------------------------------------------------------------------------------|----------------------------------------------------------------------------------------------------------------|
| Moiety formula   | C <sub>60</sub> H <sub>52</sub> Co <sub>2</sub> N <sub>4</sub> O <sub>4</sub> .C <sub>2</sub> H <sub>3</sub> N.H <sub>2</sub> | C <sub>68</sub> H <sub>68</sub> Co <sub>2</sub> N <sub>4</sub> O <sub>4</sub> .CH <sub>2</sub> Cl <sub>2</sub> | C <sub>76</sub> H <sub>84</sub> Co <sub>2</sub> N <sub>4</sub> O <sub>4</sub> .C <sub>2</sub> H <sub>3</sub> N |
| Sum formula      | C <sub>62</sub> H <sub>57</sub> Co <sub>2</sub> N <sub>5</sub> O <sub>5</sub>                                                 | C <sub>69</sub> H <sub>70</sub> Cl <sub>2</sub> Co <sub>2</sub> N <sub>4</sub> O <sub>4</sub>                  | C <sub>78</sub> H <sub>87</sub> Co <sub>2</sub> N <sub>5</sub> O <sub>4</sub>                                  |
| Crystal system   | Orthorhombic                                                                                                                  | Triclinic                                                                                                      | Triclinic                                                                                                      |
| Formula weight   | 1070.041                                                                                                                      | 1208.121                                                                                                       | 1276.458                                                                                                       |
| Crystal color    | Green                                                                                                                         | Green                                                                                                          | Green                                                                                                          |
| Space group      | <i>P</i> 2 <sub>1</sub> 2 <sub>1</sub> 2 <sub>1</sub>                                                                         | P -1                                                                                                           | P-1                                                                                                            |
| a/Å              | 12.078(2)                                                                                                                     | 12.2854(15)                                                                                                    | 14.022(9)                                                                                                      |
| b/Å              | 13.095(2)                                                                                                                     | 13.8933(19)                                                                                                    | 16.557(10)                                                                                                     |
| c/Å              | 33.434(5)                                                                                                                     | 18.666(3)                                                                                                      | 16.724(11)                                                                                                     |
| α/°              | 90                                                                                                                            | 85.816(4)                                                                                                      | 105.310(8)                                                                                                     |
| β/°              | 90                                                                                                                            | 80.738(5)                                                                                                      | 108.728(5)                                                                                                     |
| γ/°              | 90                                                                                                                            | 78.222(4)                                                                                                      | 100.126(5)                                                                                                     |

---

|                                   |            |            |            |
|-----------------------------------|------------|------------|------------|
| Z                                 | 4          | 2          | 2          |
| temperature (K)                   | 100(2)     | 100(2)     | 100(2)     |
| Radiation ( $\lambda$ , Å)        | 0.71075    | 0.71075    | 0.71075    |
| $\rho$ (calcd.) gcm <sup>-3</sup> | 1.344      | 1.305      | 1.247      |
| F000                              | 2236.205   | 1266.712   | 1354.189   |
| Mu (mm <sup>-1</sup> )            | 0.683      | 0.678      | 0.541      |
| $\theta$ max, deg.                | 25.000     | 25.000     | 25.000     |
| No. of data                       | 9179       | 10814      | 12313      |
| h, k, l max                       | 14, 15, 39 | 14, 16, 22 | 14, 15, 39 |
| No. of parameters                 | 679        | 730        | 803        |
| Data completeness                 | 0.98       | 0.995      | 0.991      |
| R1                                | 0.0414     | 0.0474     | 0.1053     |

---

---

|                        |                  |                |               |
|------------------------|------------------|----------------|---------------|
| wR2                    | 0.1041           | 0.1205         | 0.2390        |
| GOF                    | 0.9260           | 1.0408         | 1.0376        |
| <b>CCDC</b>            | <b>1049317</b>   | <b>1044421</b> | <b>978972</b> |
| <b>Flack Parameter</b> | <b>0.249(15)</b> | <b>n/a</b>     | <b>n/a</b>    |

---

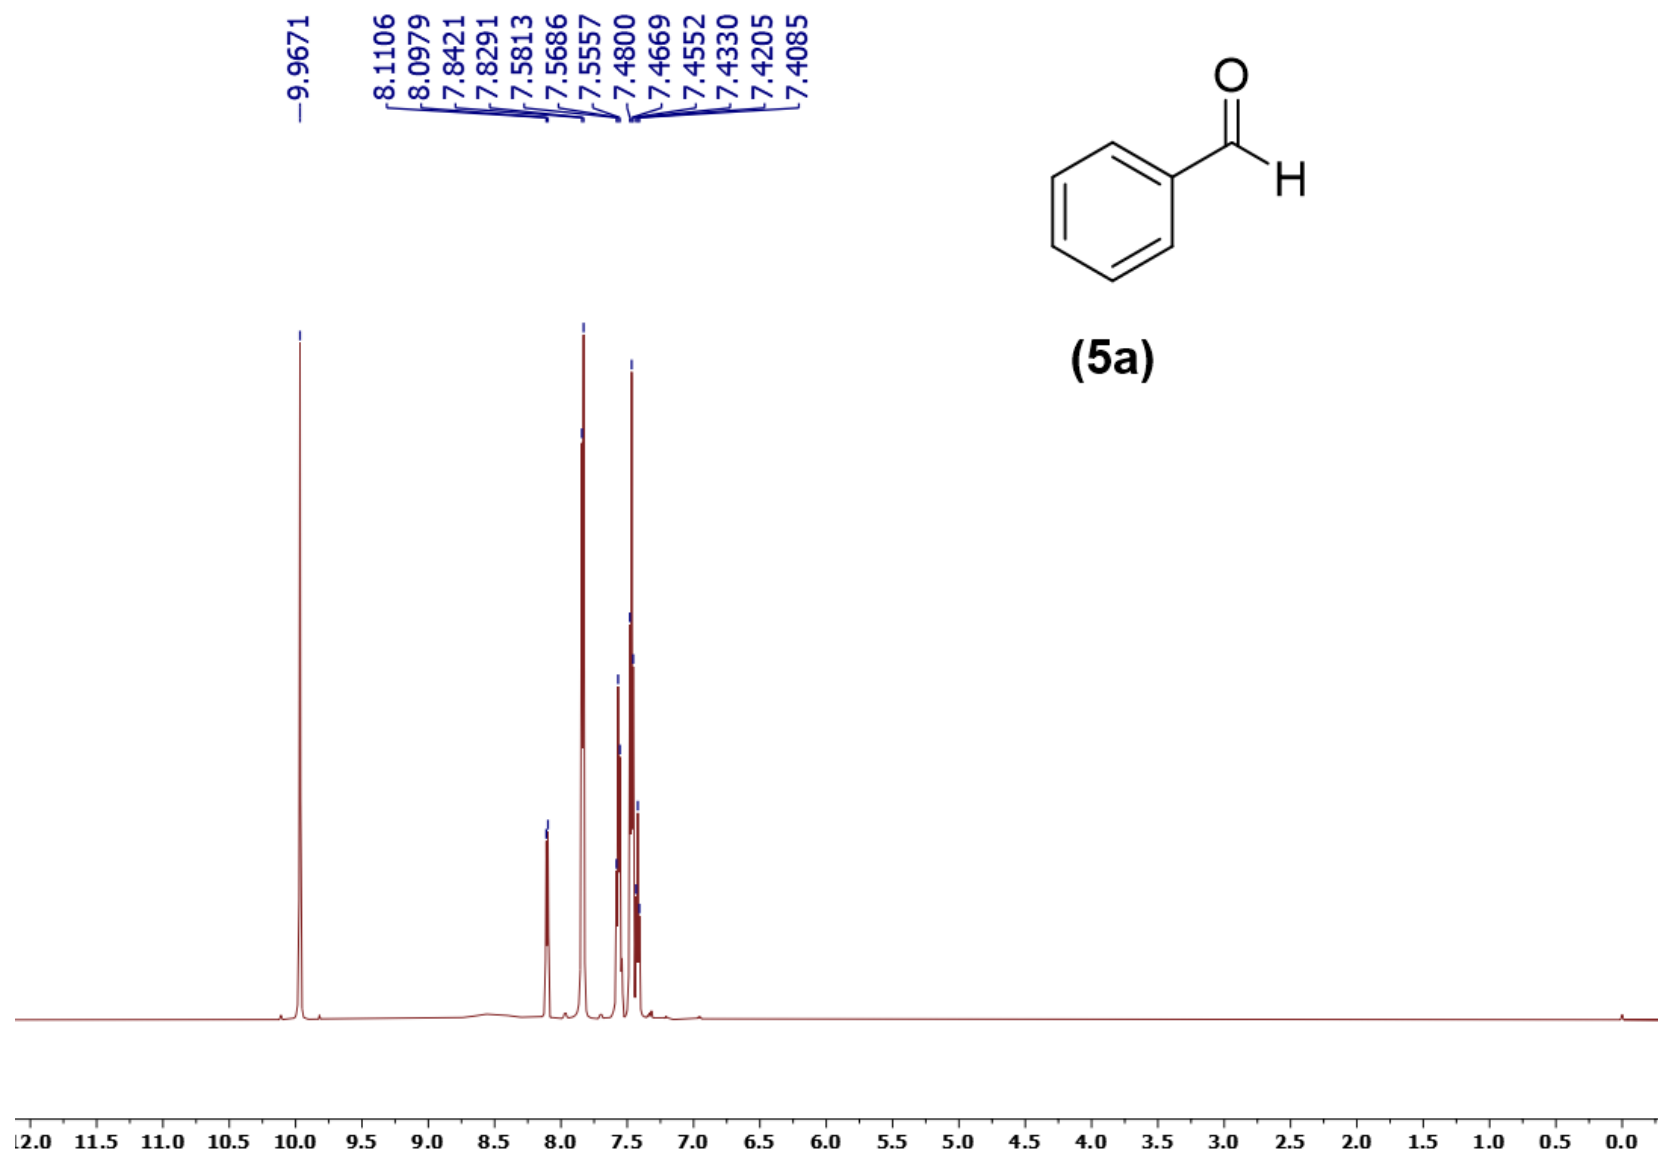

**Figure S22.**  $^1\text{H}$  NMR spectrum of **5a** in  $\text{CDCl}_3$ .



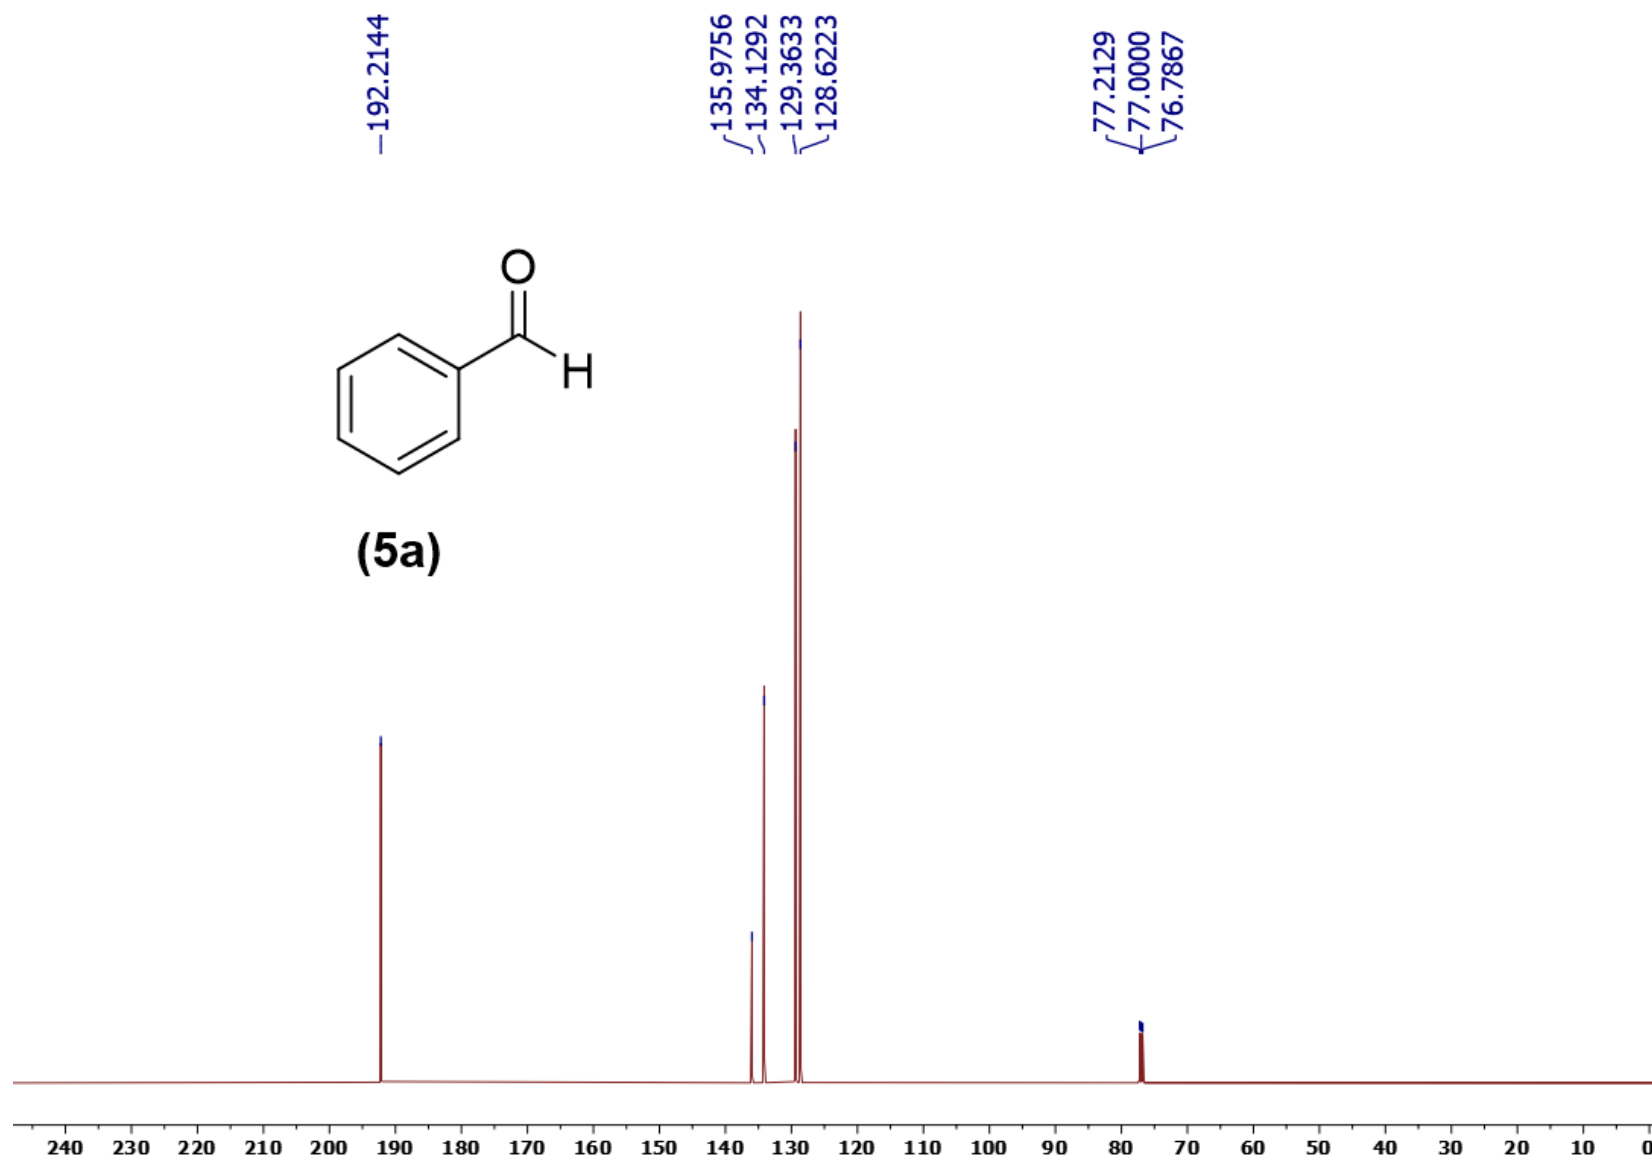

Figure S23.  $^{13}\text{C}\{^1\text{H}\}$  NMR spectrum of **5a** in  $\text{CDCl}_3$ .

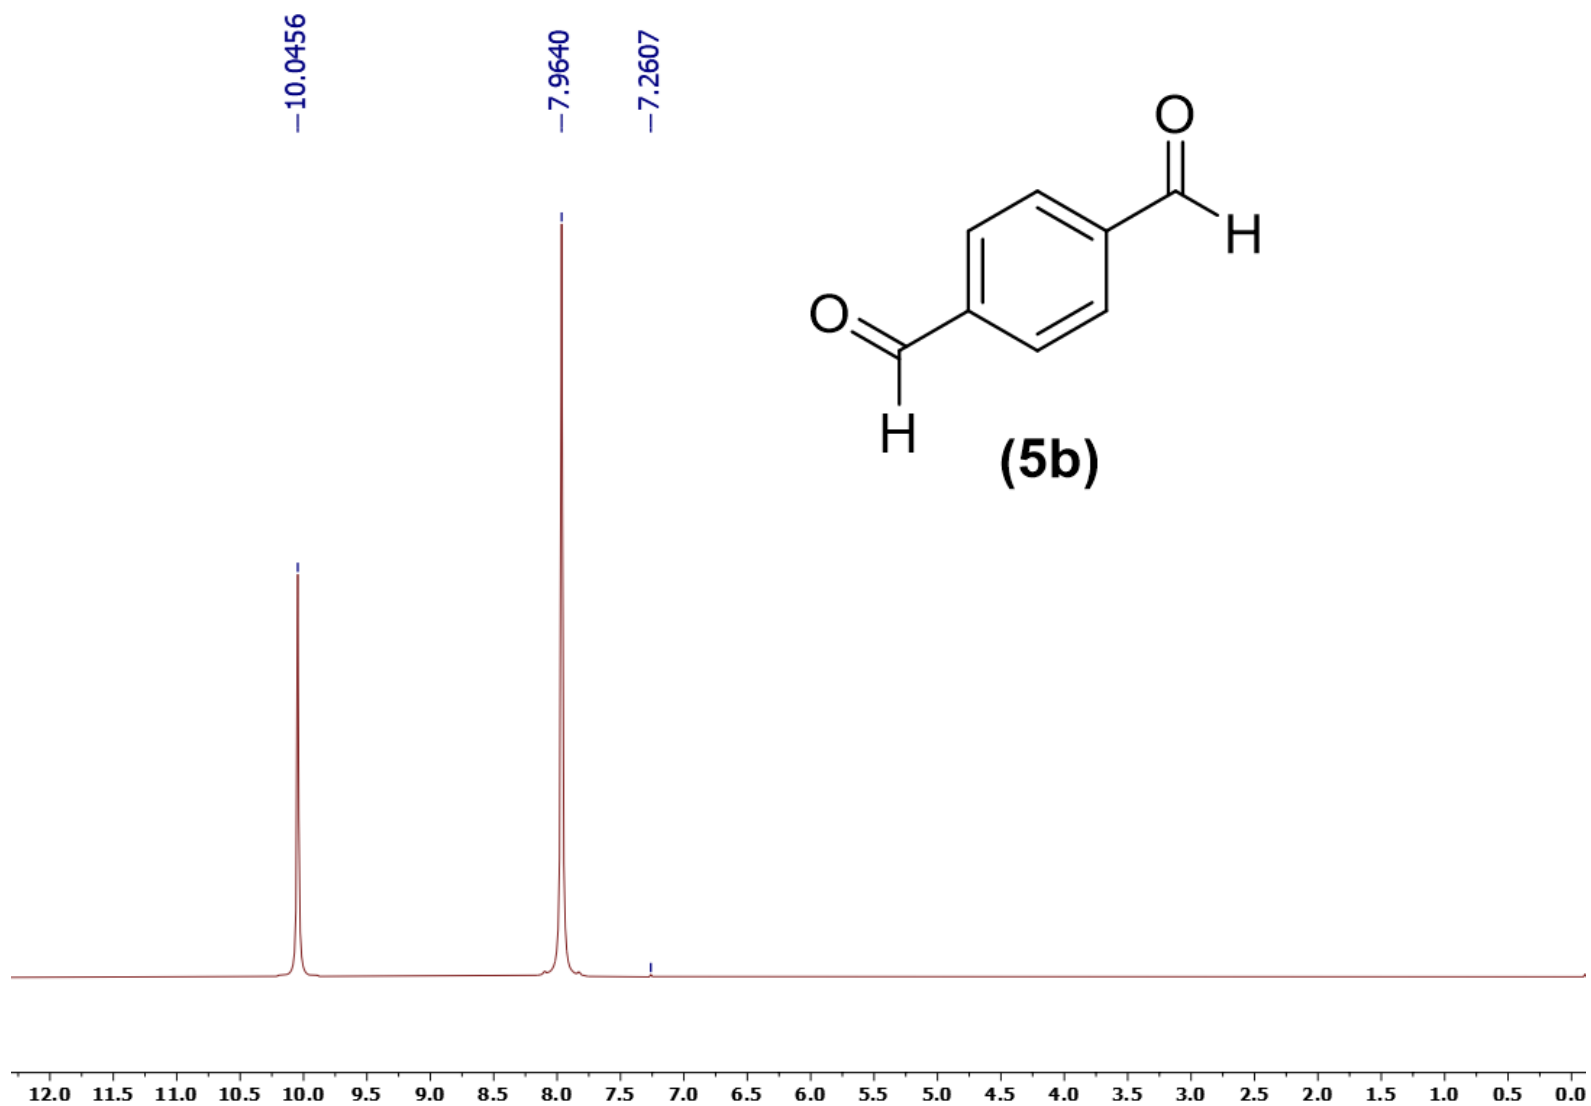

**Figure S24.**  $^1\text{H}$  NMR spectrum of **5b** in  $\text{CDCl}_3$ .

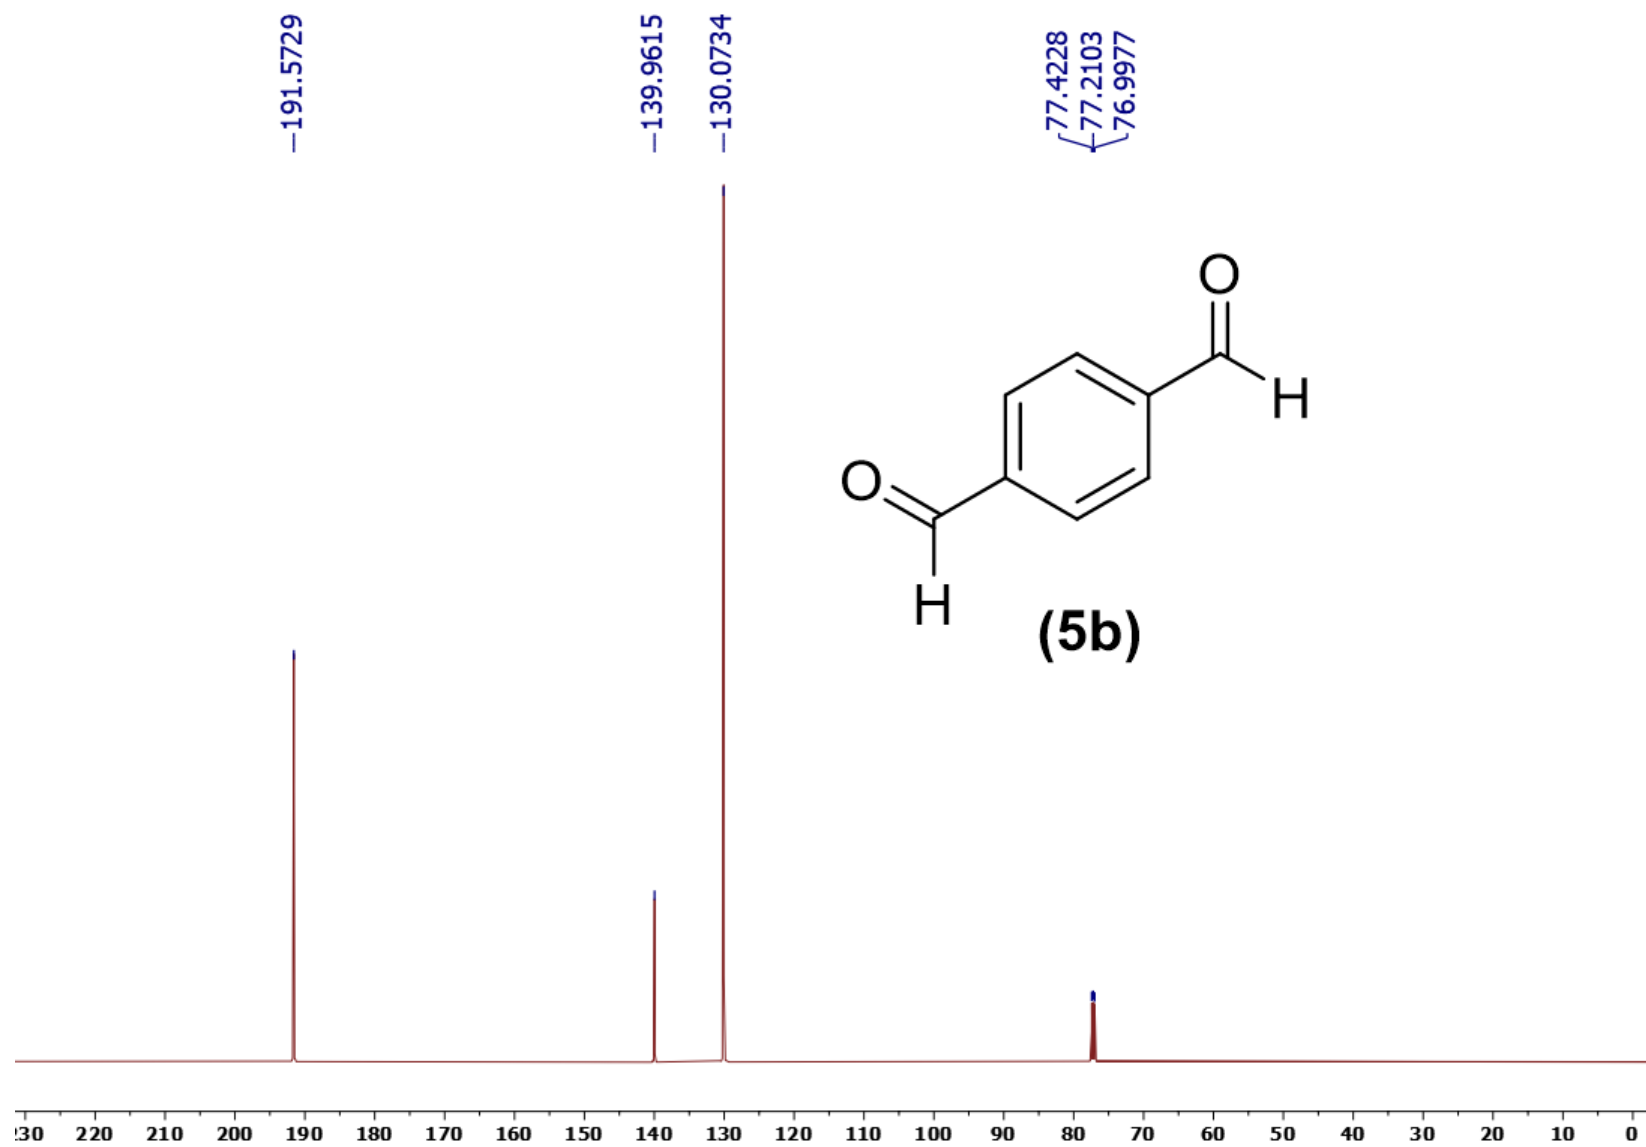

Figure S25.  $^{13}\text{C}\{^1\text{H}\}$  NMR spectrum of **5b** in  $\text{CDCl}_3$ .

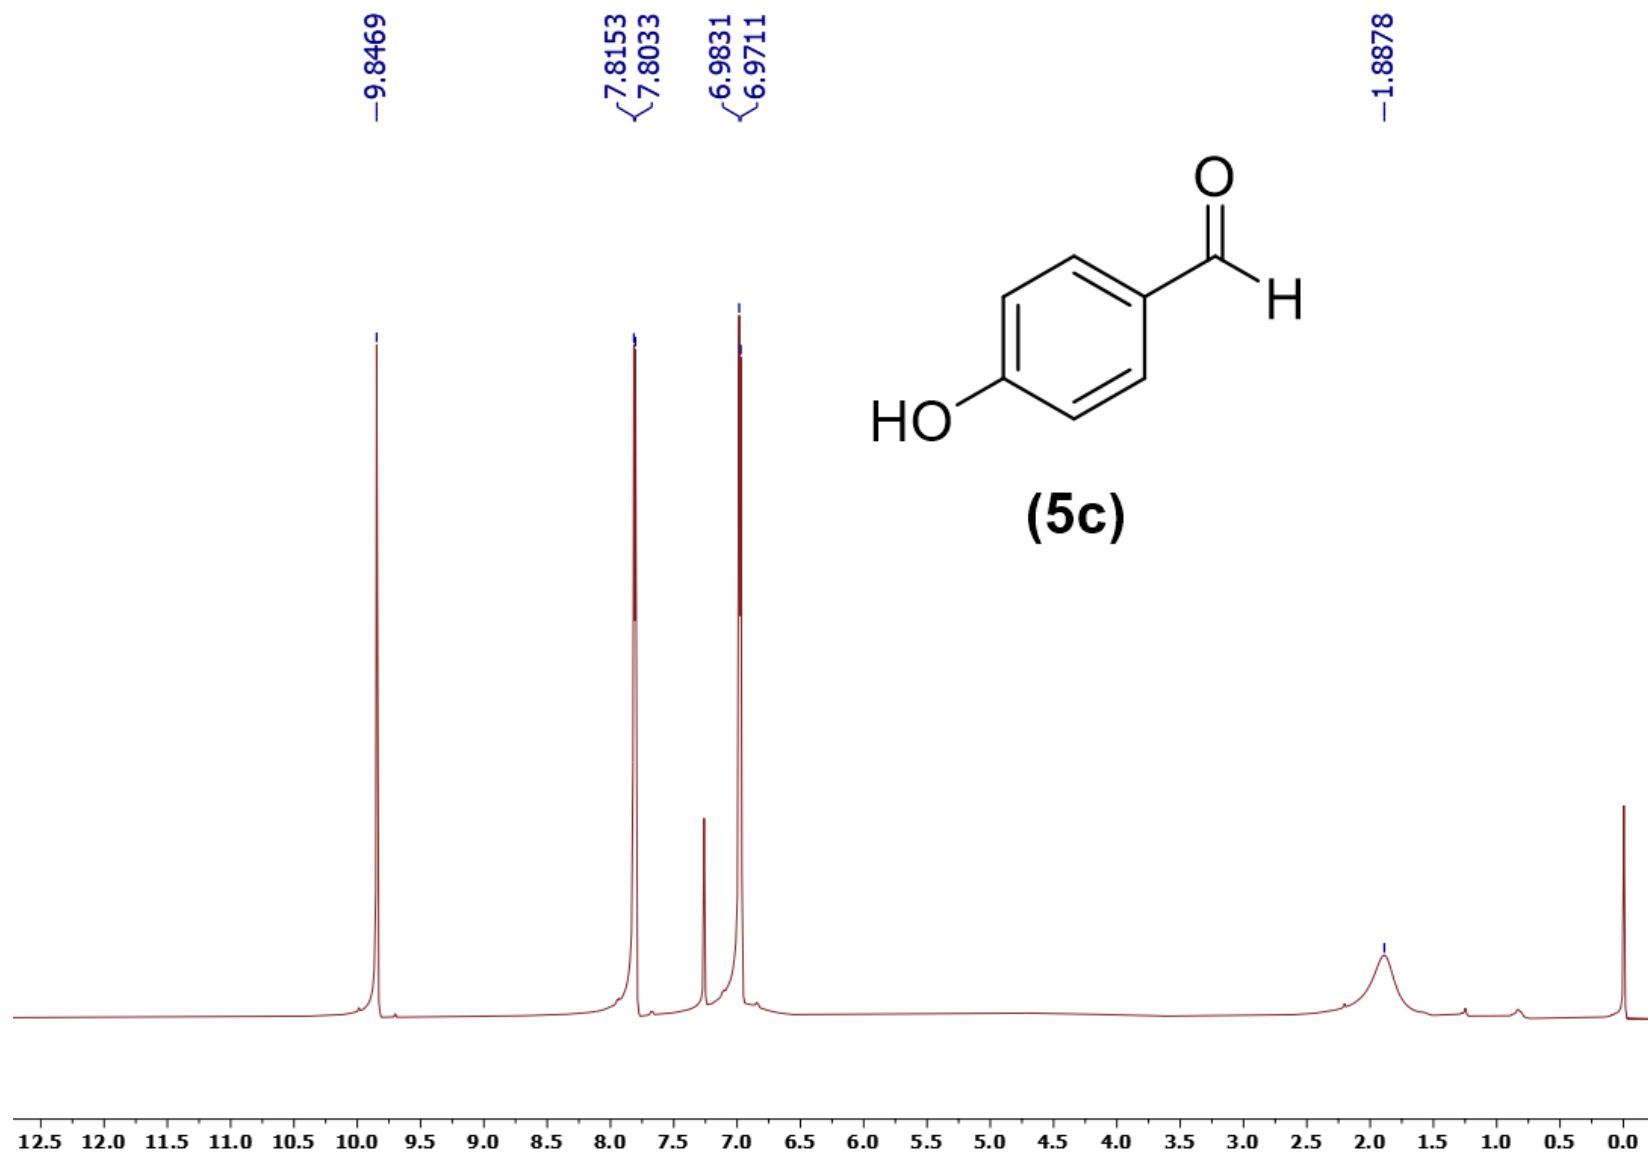

Figure S26. <sup>1</sup>H NMR spectrum of 5c in CDCl<sub>3</sub>.

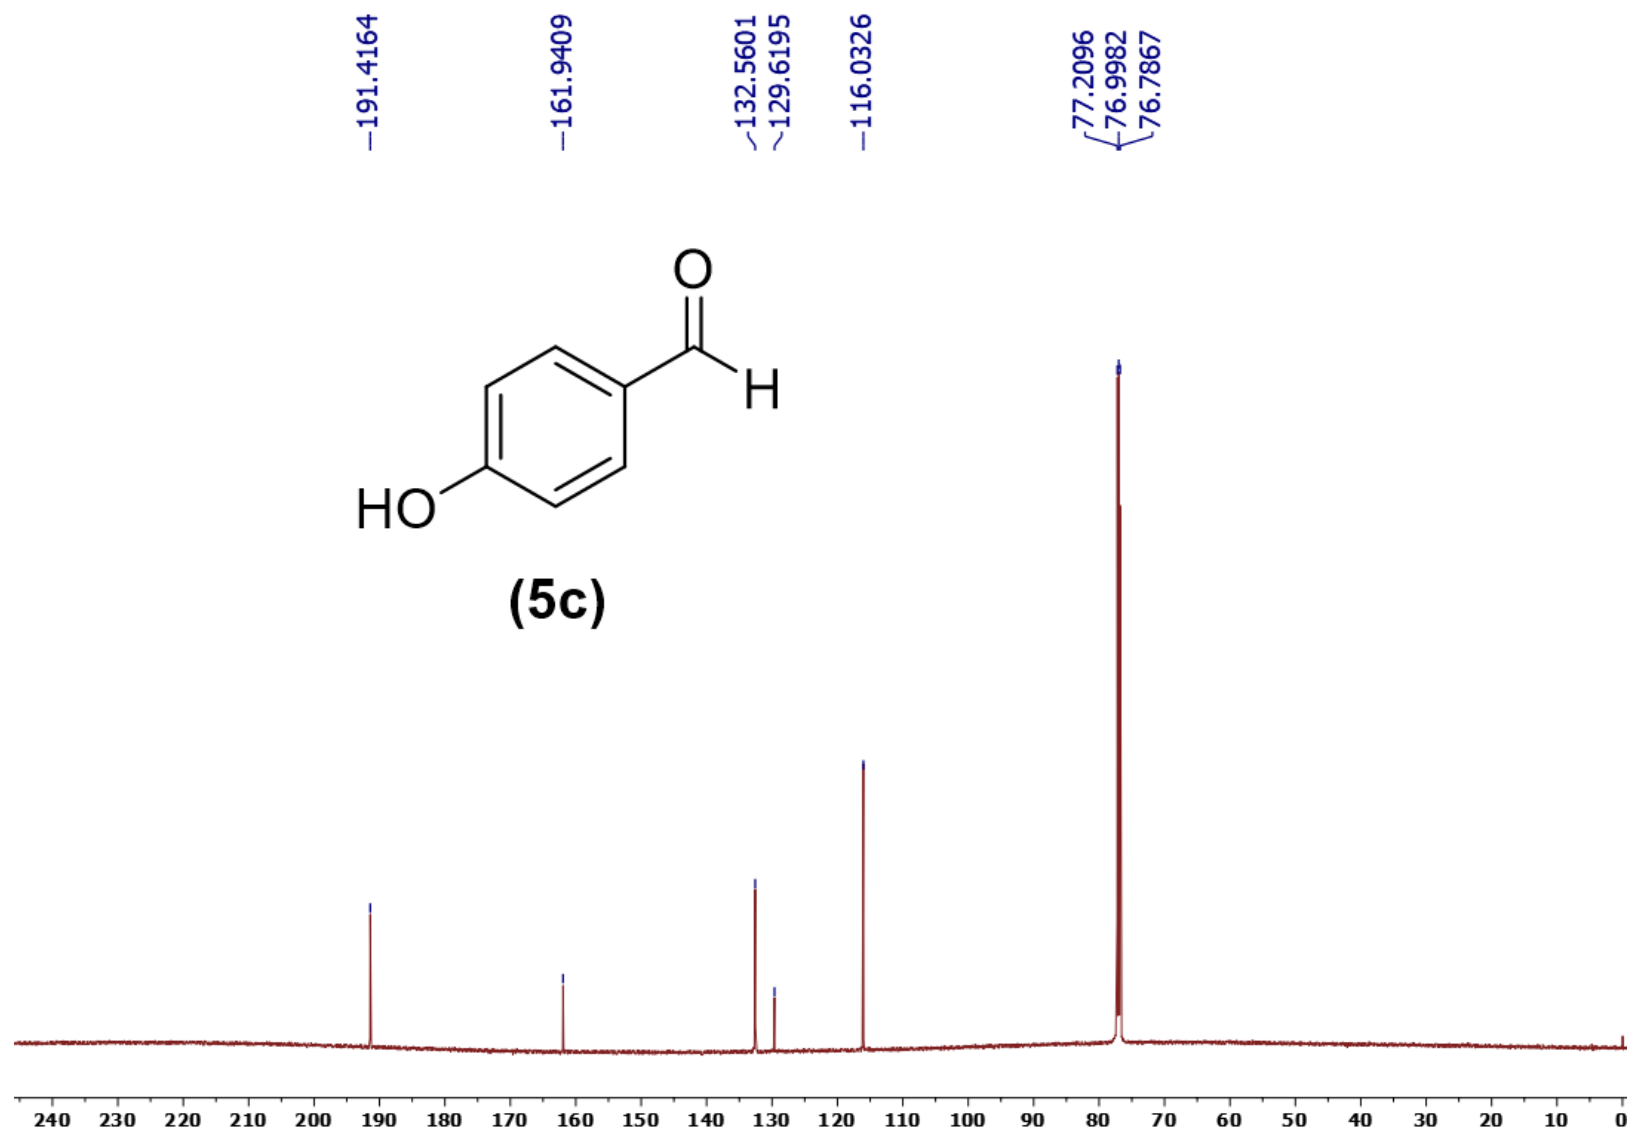

Figure S27.  $^{13}\text{C}\{^1\text{H}\}$  NMR spectrum of **5c** in  $\text{CDCl}_3$ .

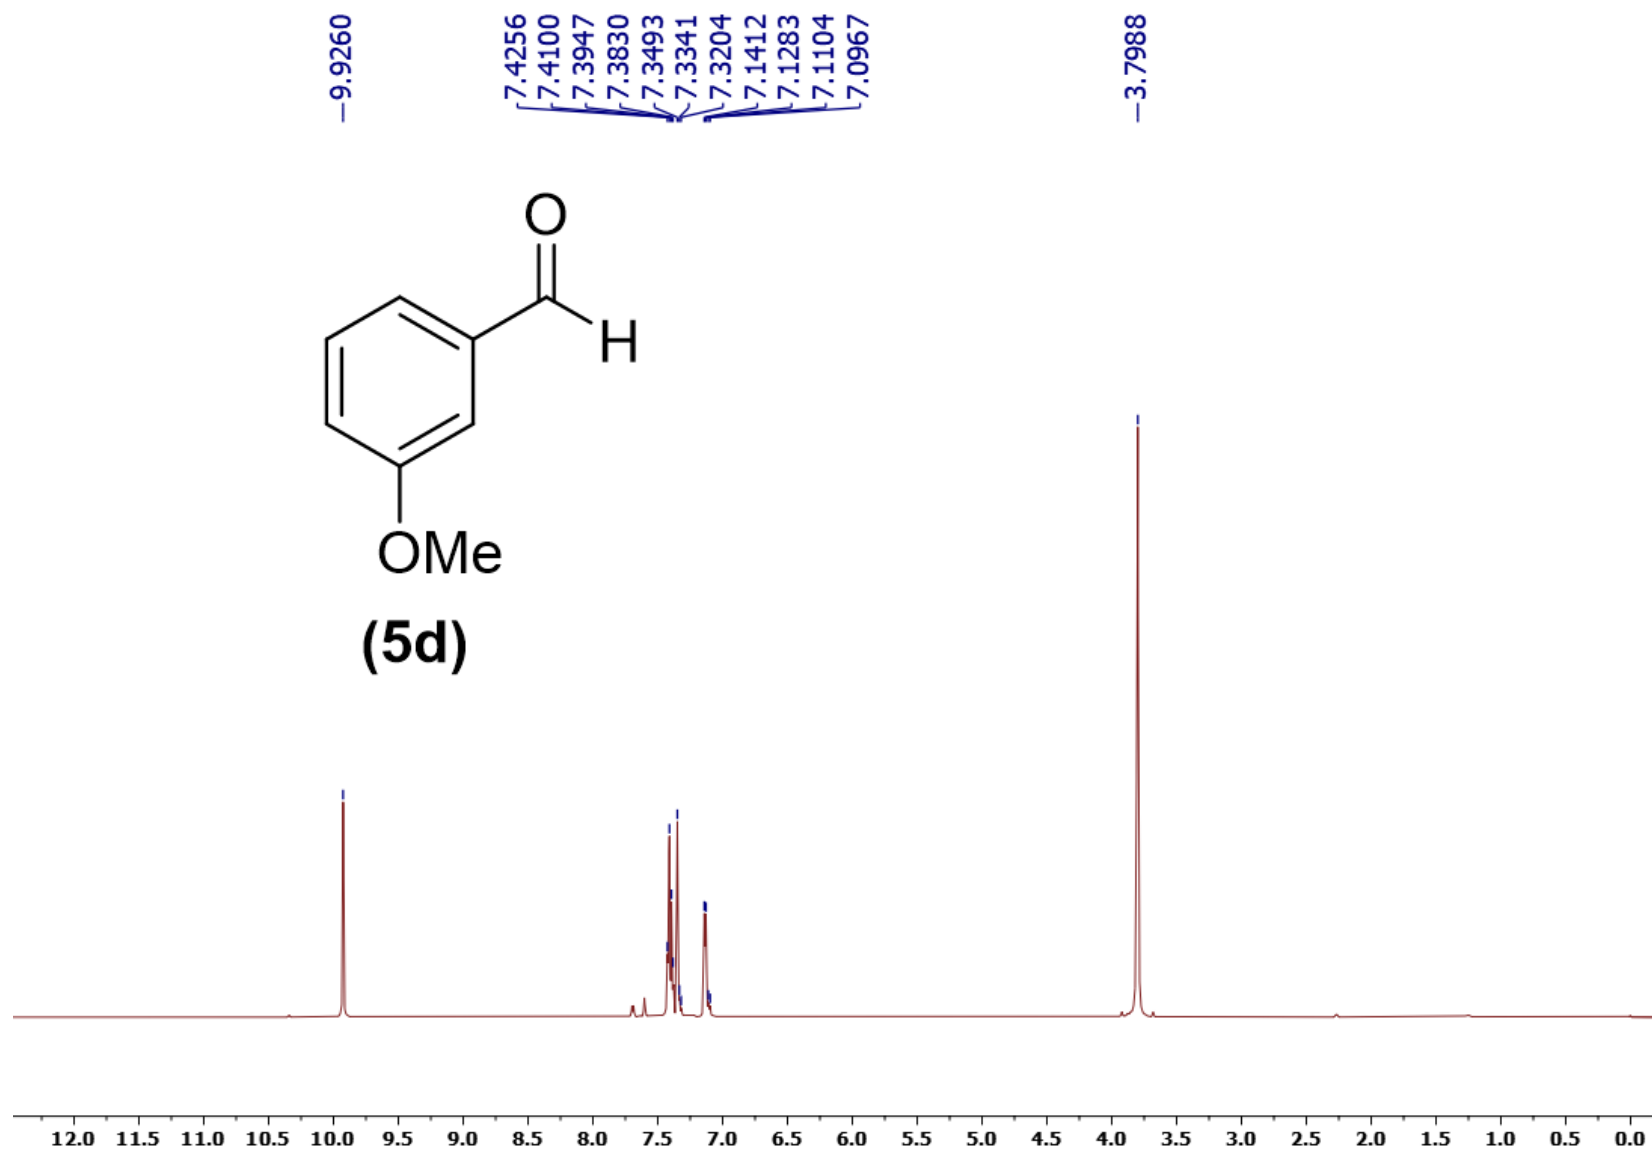

Figure S28.  $^1\text{H}$  NMR spectrum of **5d** in  $\text{CDCl}_3$ .

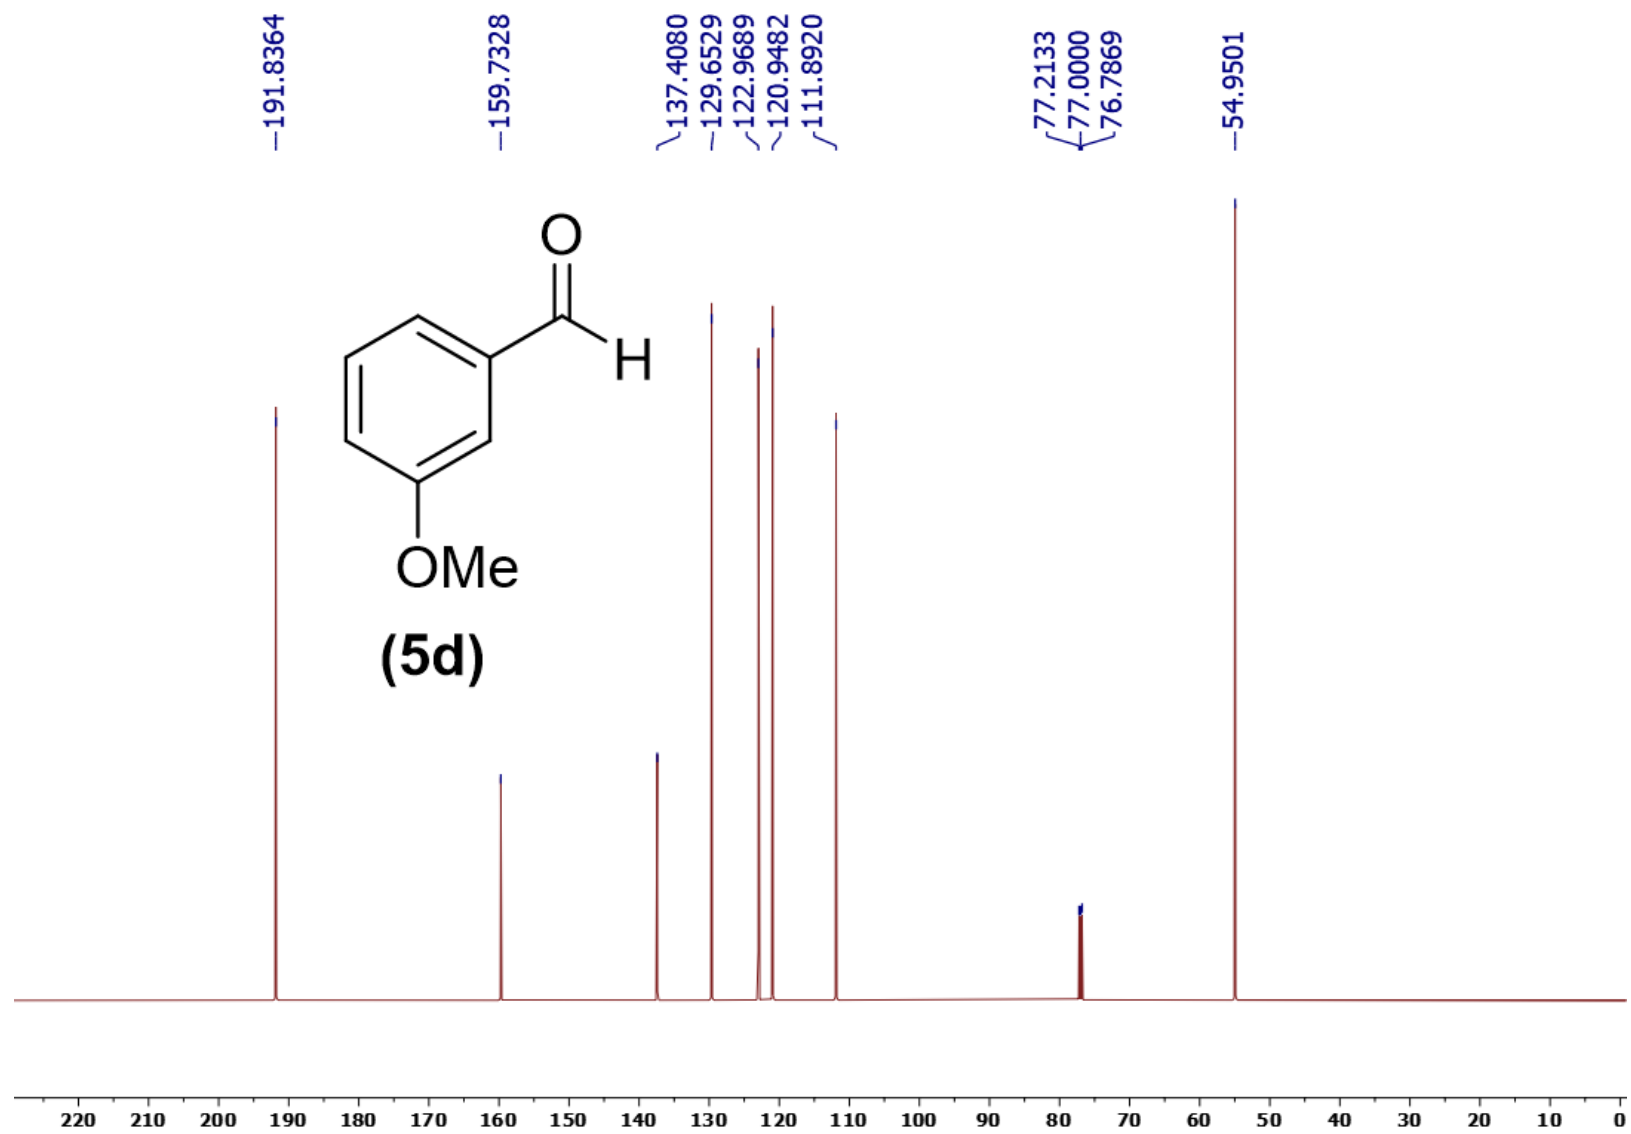

Figure S29.  $^{13}\text{C}\{^1\text{H}\}$  NMR spectrum of **5d** in  $\text{CDCl}_3$ .

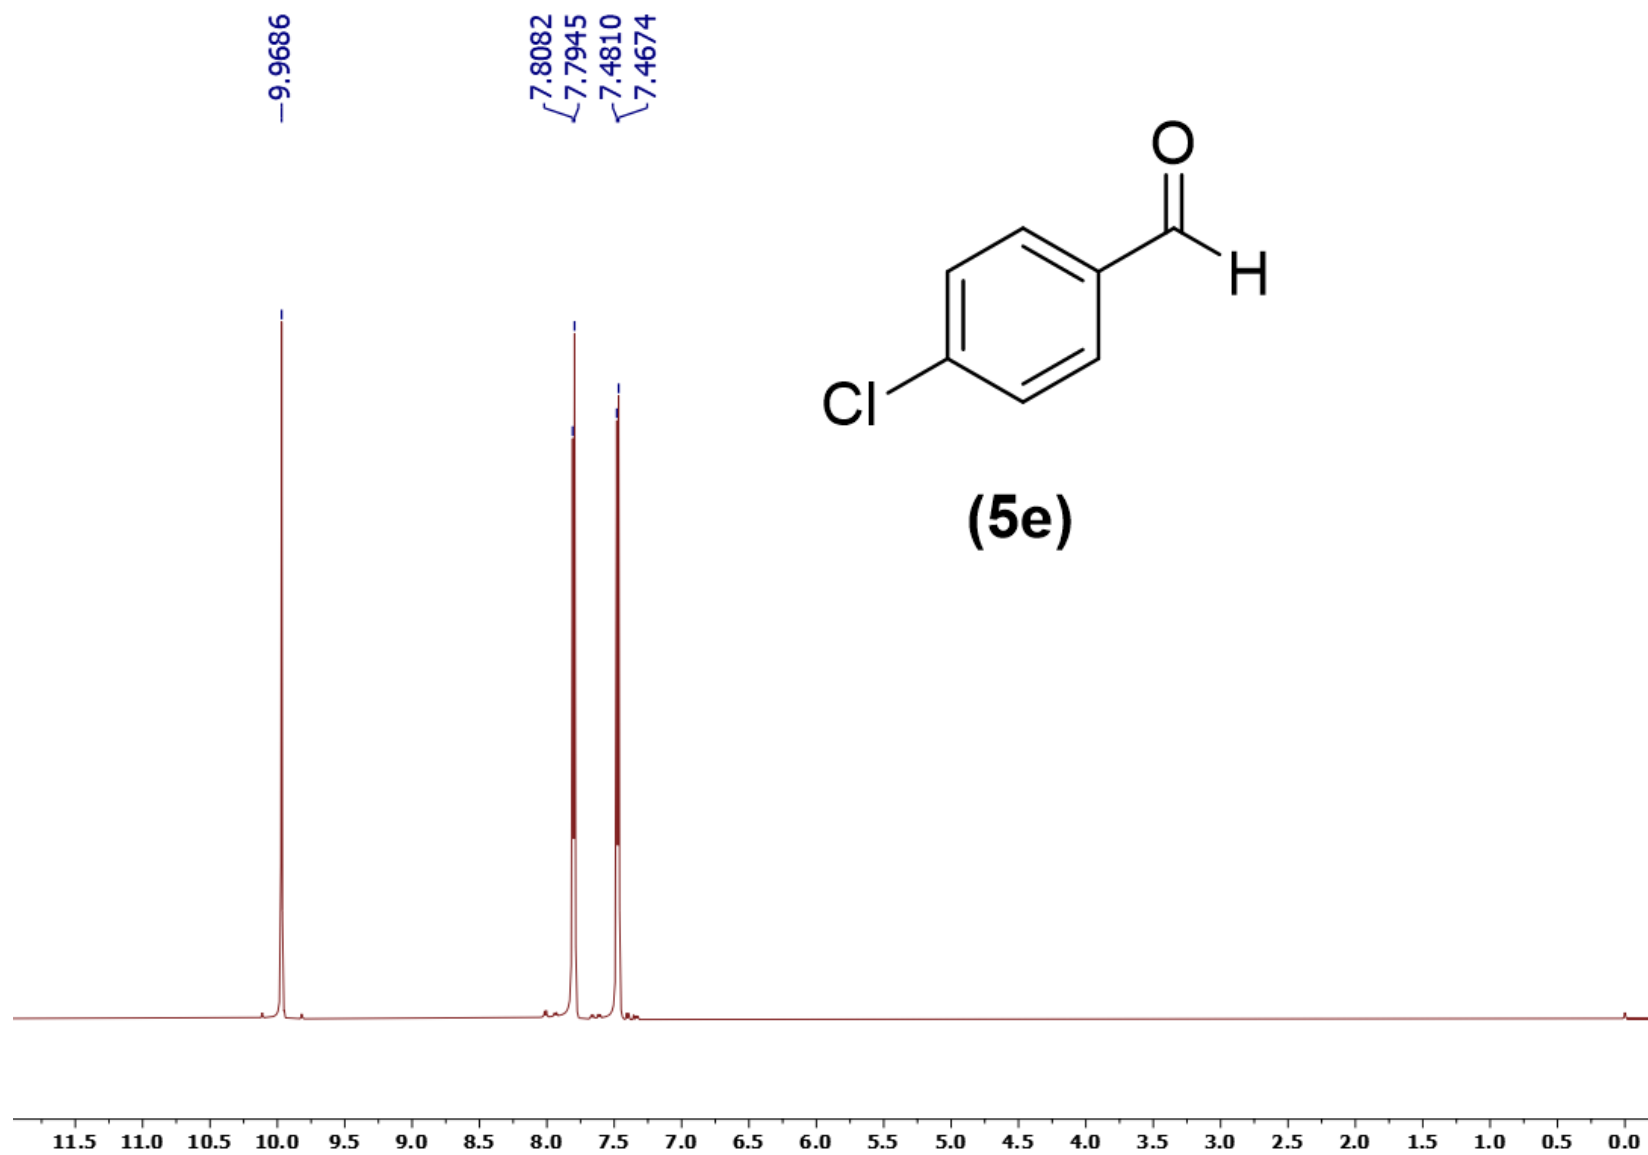

**Figure S30.**  $^1\text{H}$  NMR spectrum of **5e** in  $\text{CDCl}_3$ .



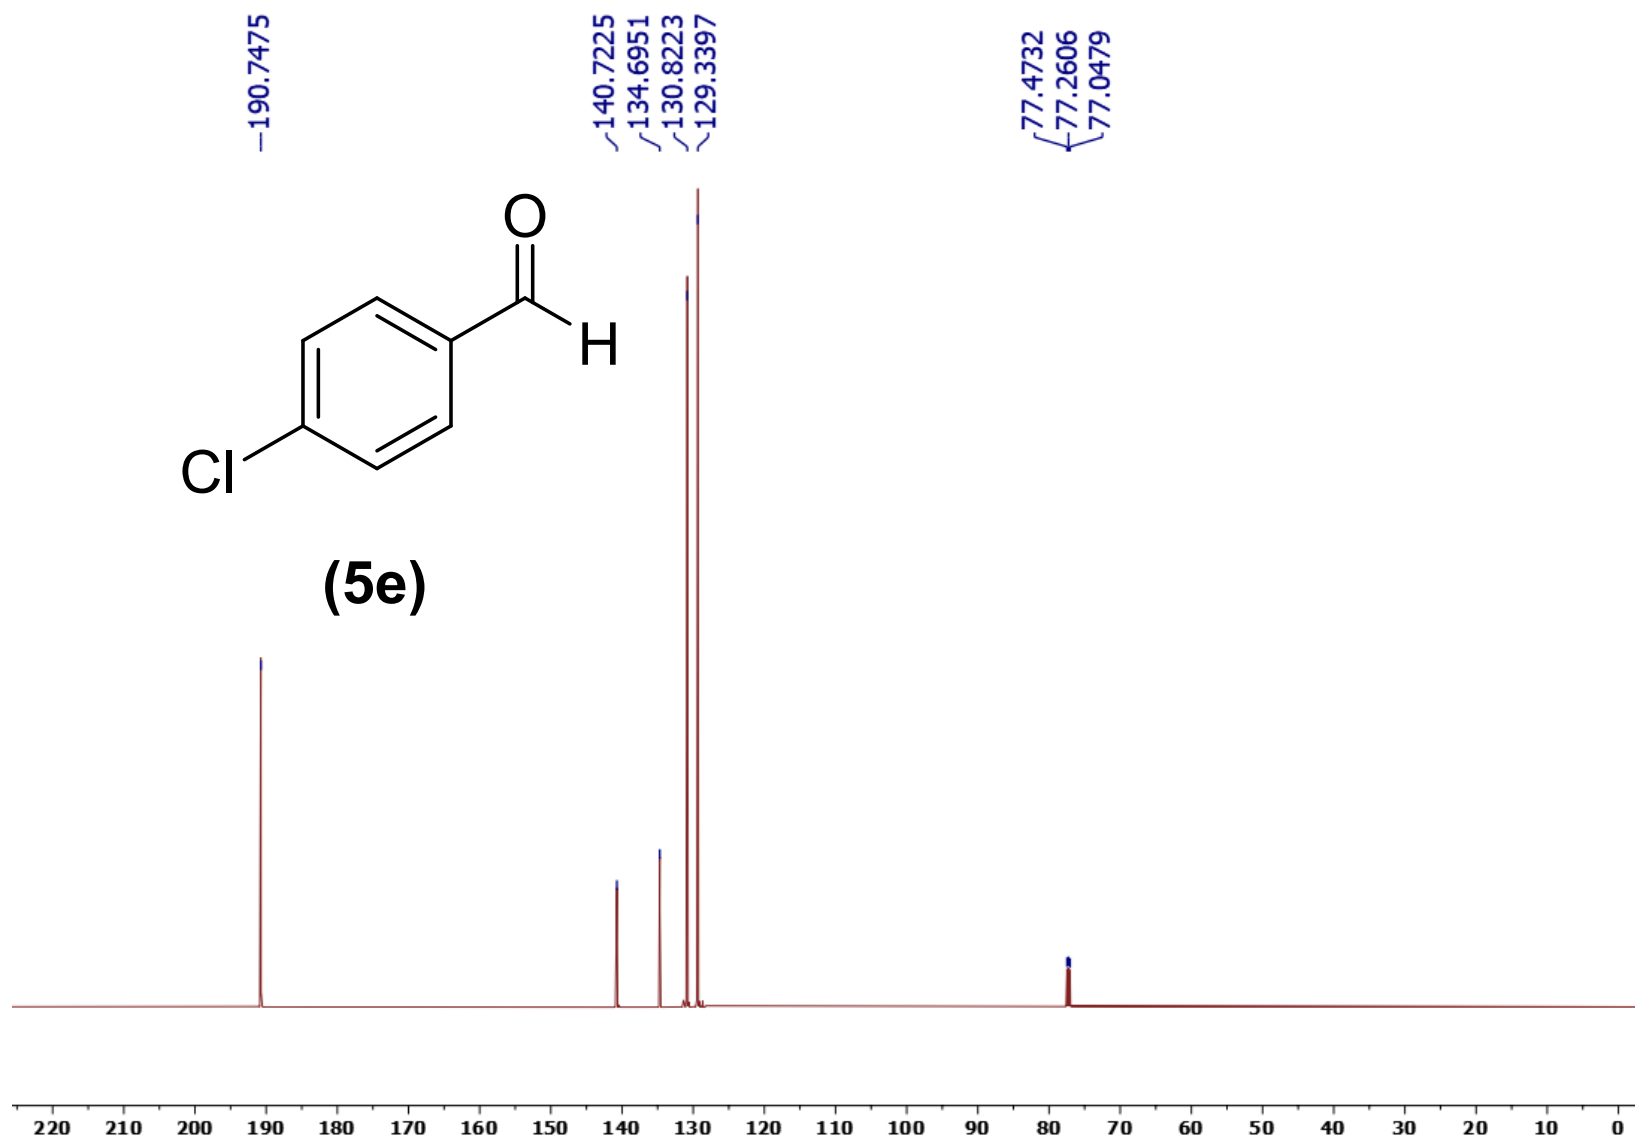

Figure S31.  $^{13}\text{C}\{^1\text{H}\}$  NMR spectrum of **5e** in  $\text{CDCl}_3$ .

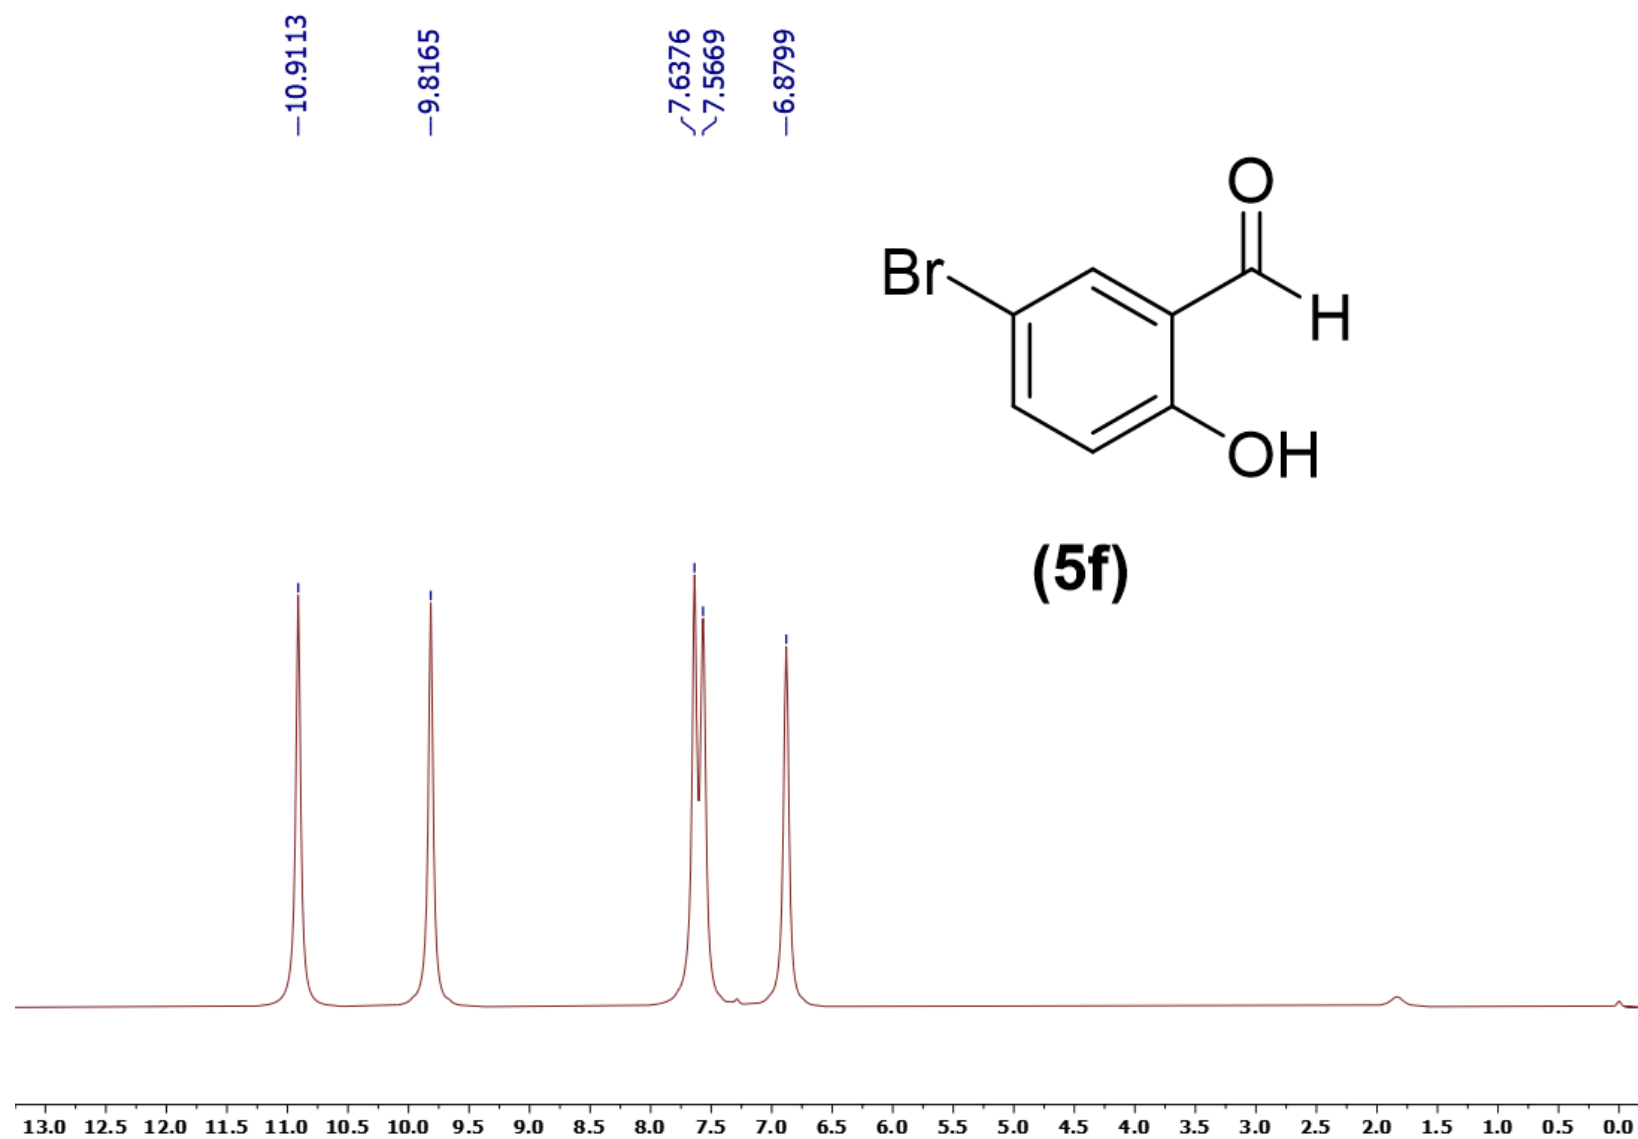

**Figure S32.**  $^1\text{H}$  NMR spectrum of **5f** in  $\text{CDCl}_3$ .

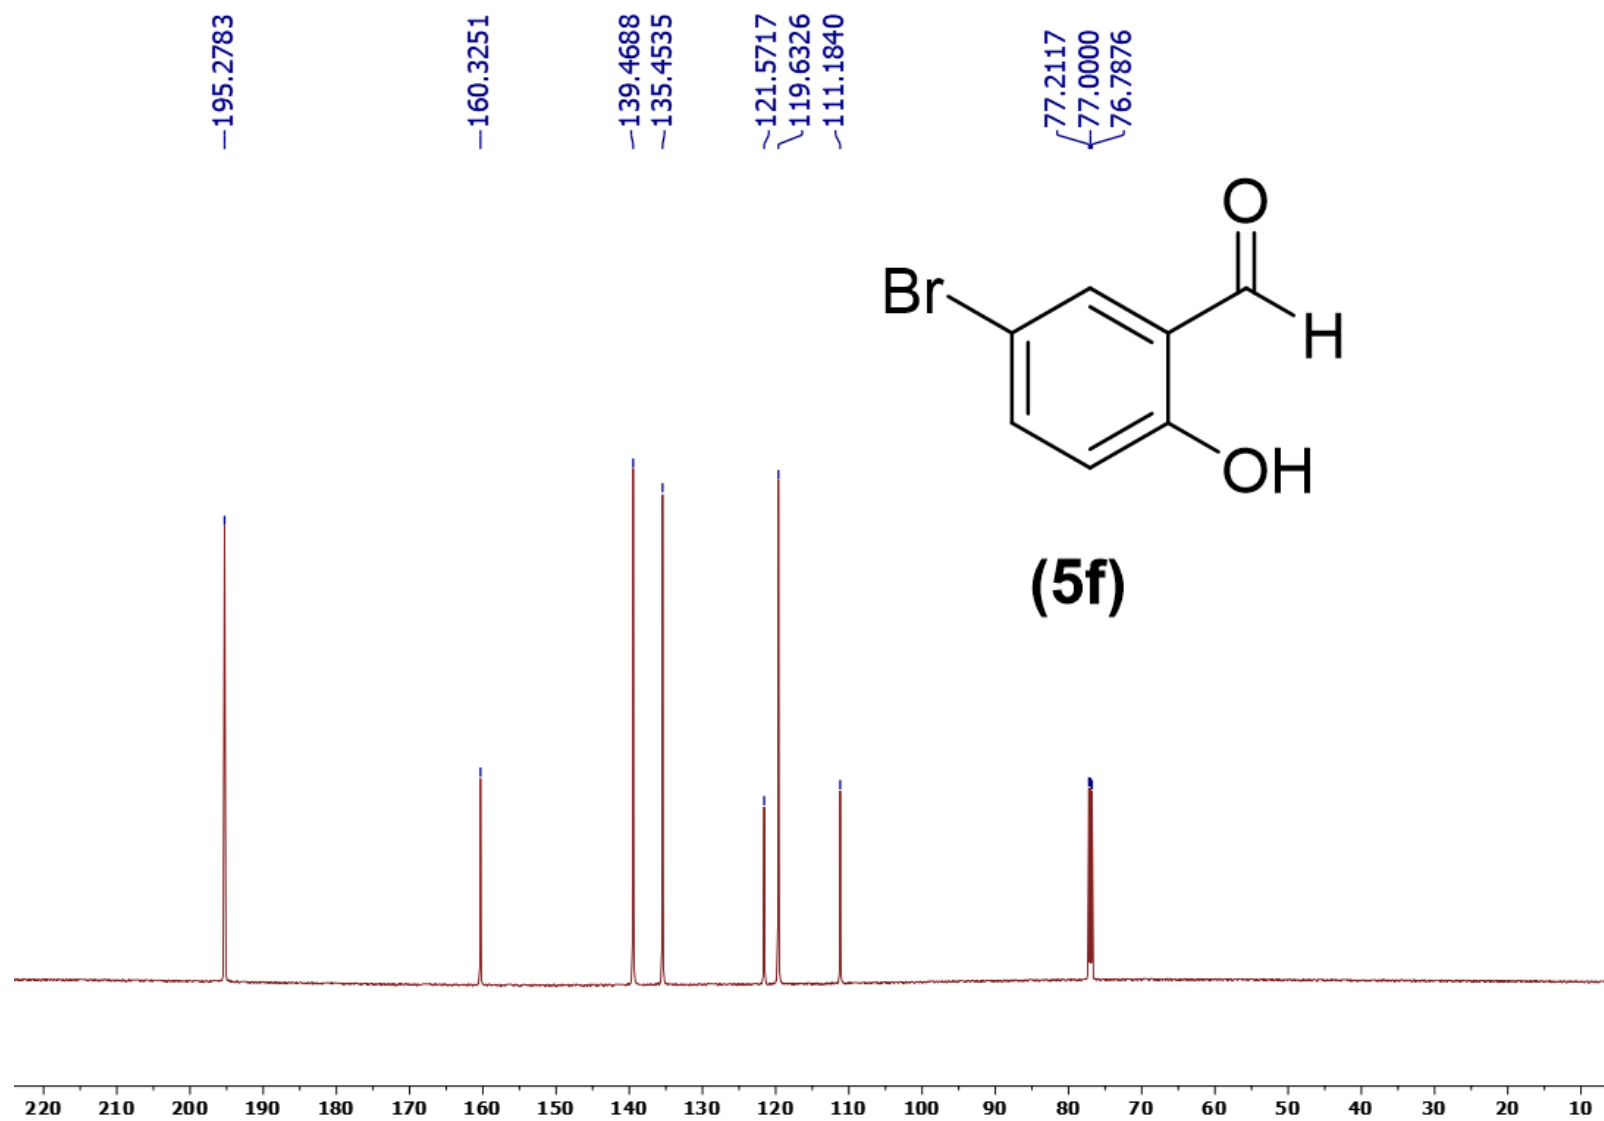

Figure S33.  $^{13}\text{C}\{^1\text{H}\}$  NMR spectrum of **5f** in  $\text{CDCl}_3$ .

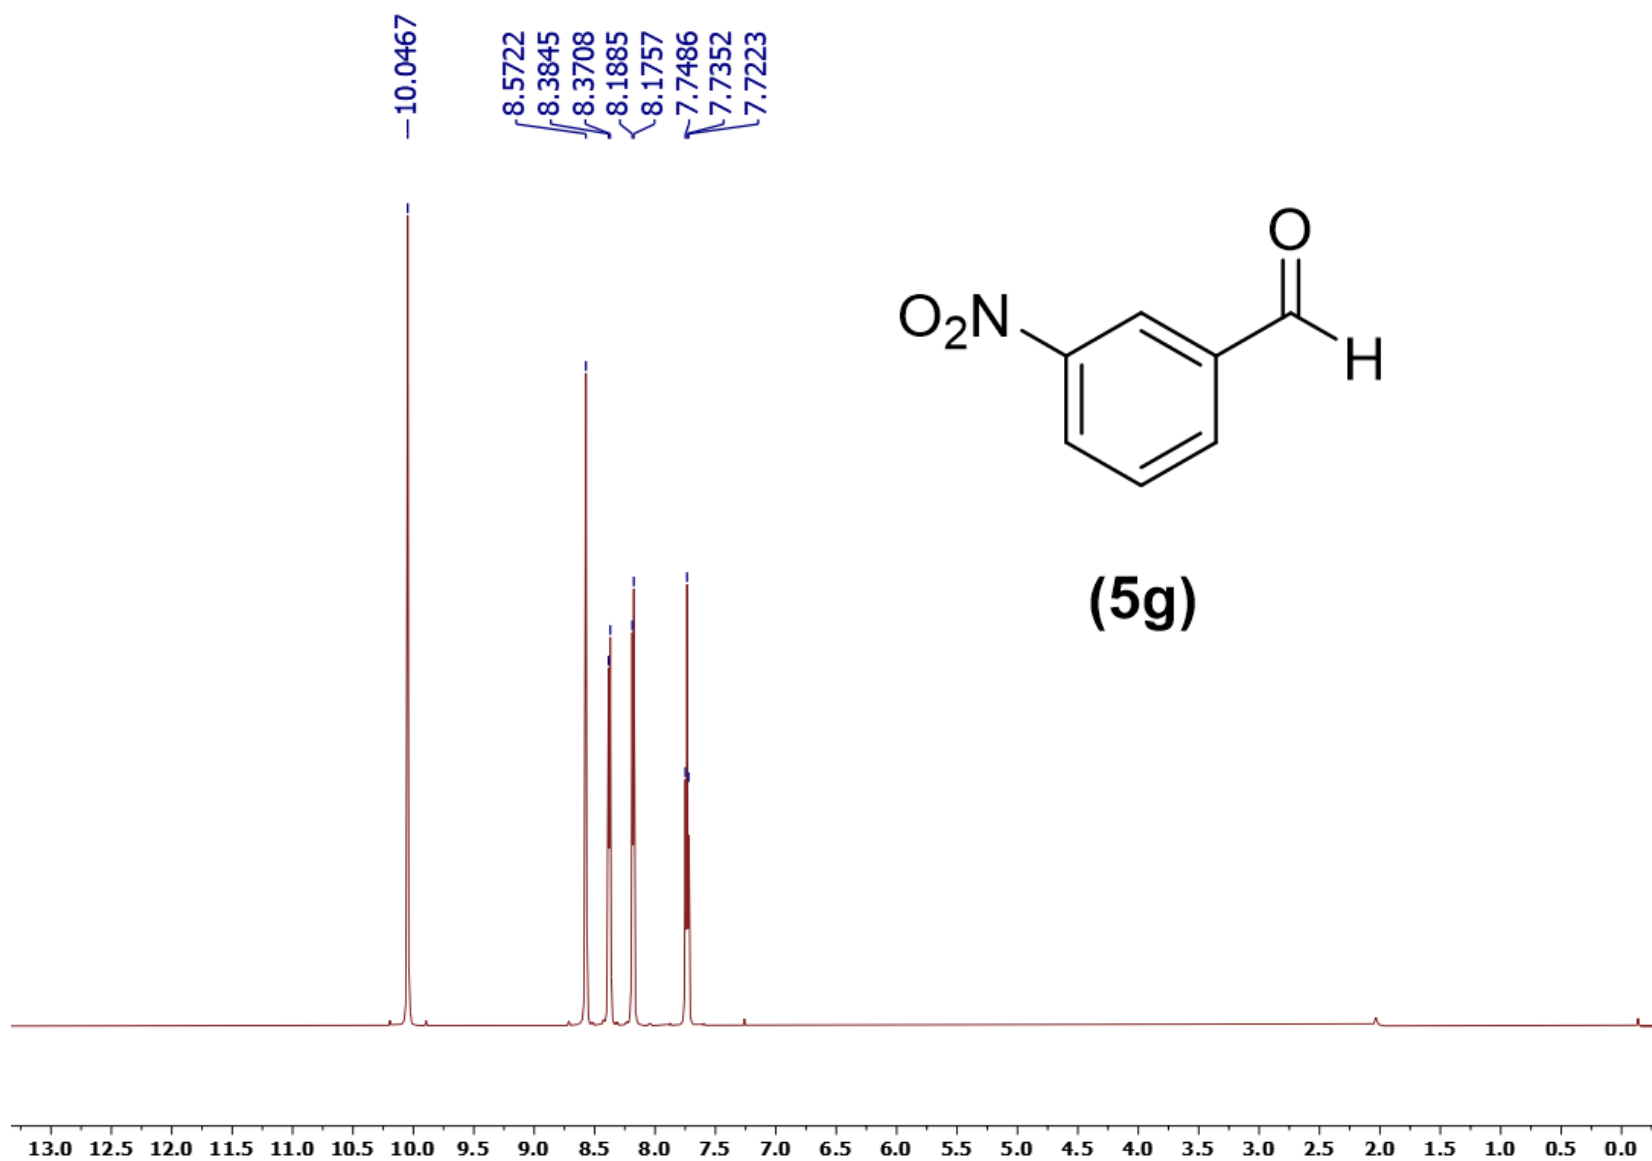

Figure S34.  $^1\text{H}$  NMR spectrum of 5g in  $\text{CDCl}_3$ .

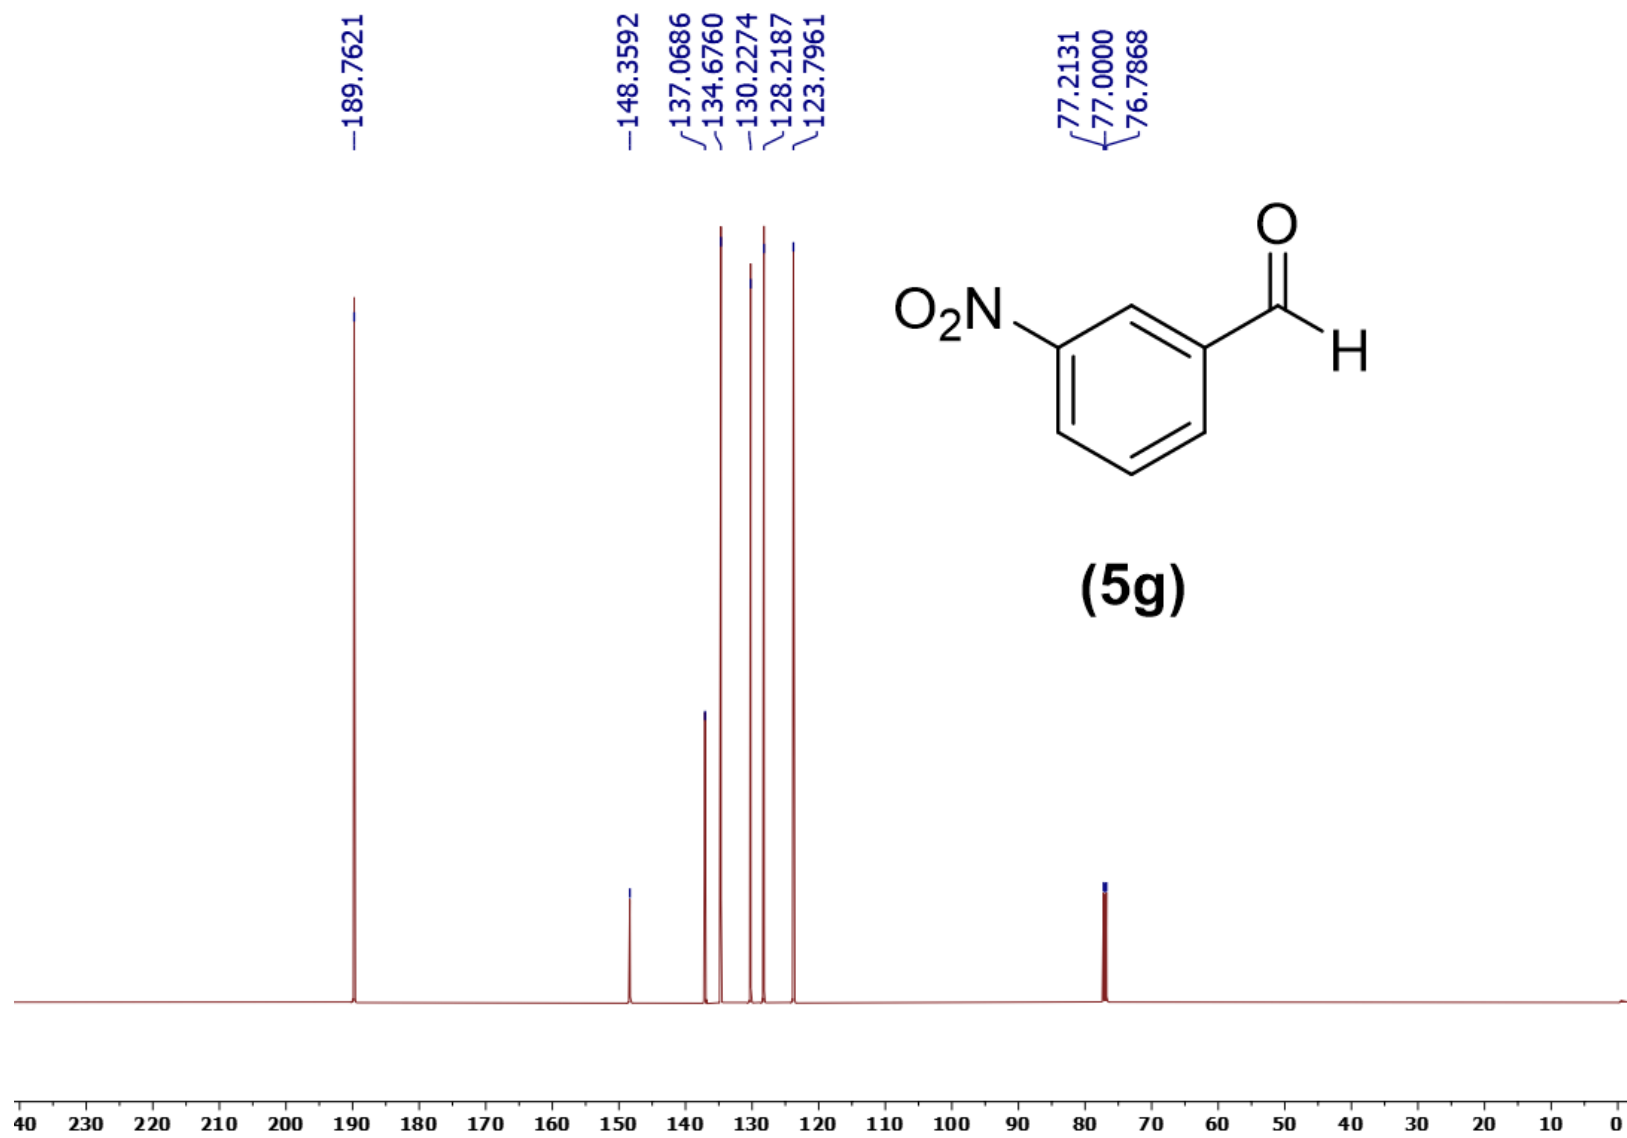

Figure S35.  $^{13}\text{C}\{^1\text{H}\}$  NMR spectrum of **5g** in  $\text{CDCl}_3$ .

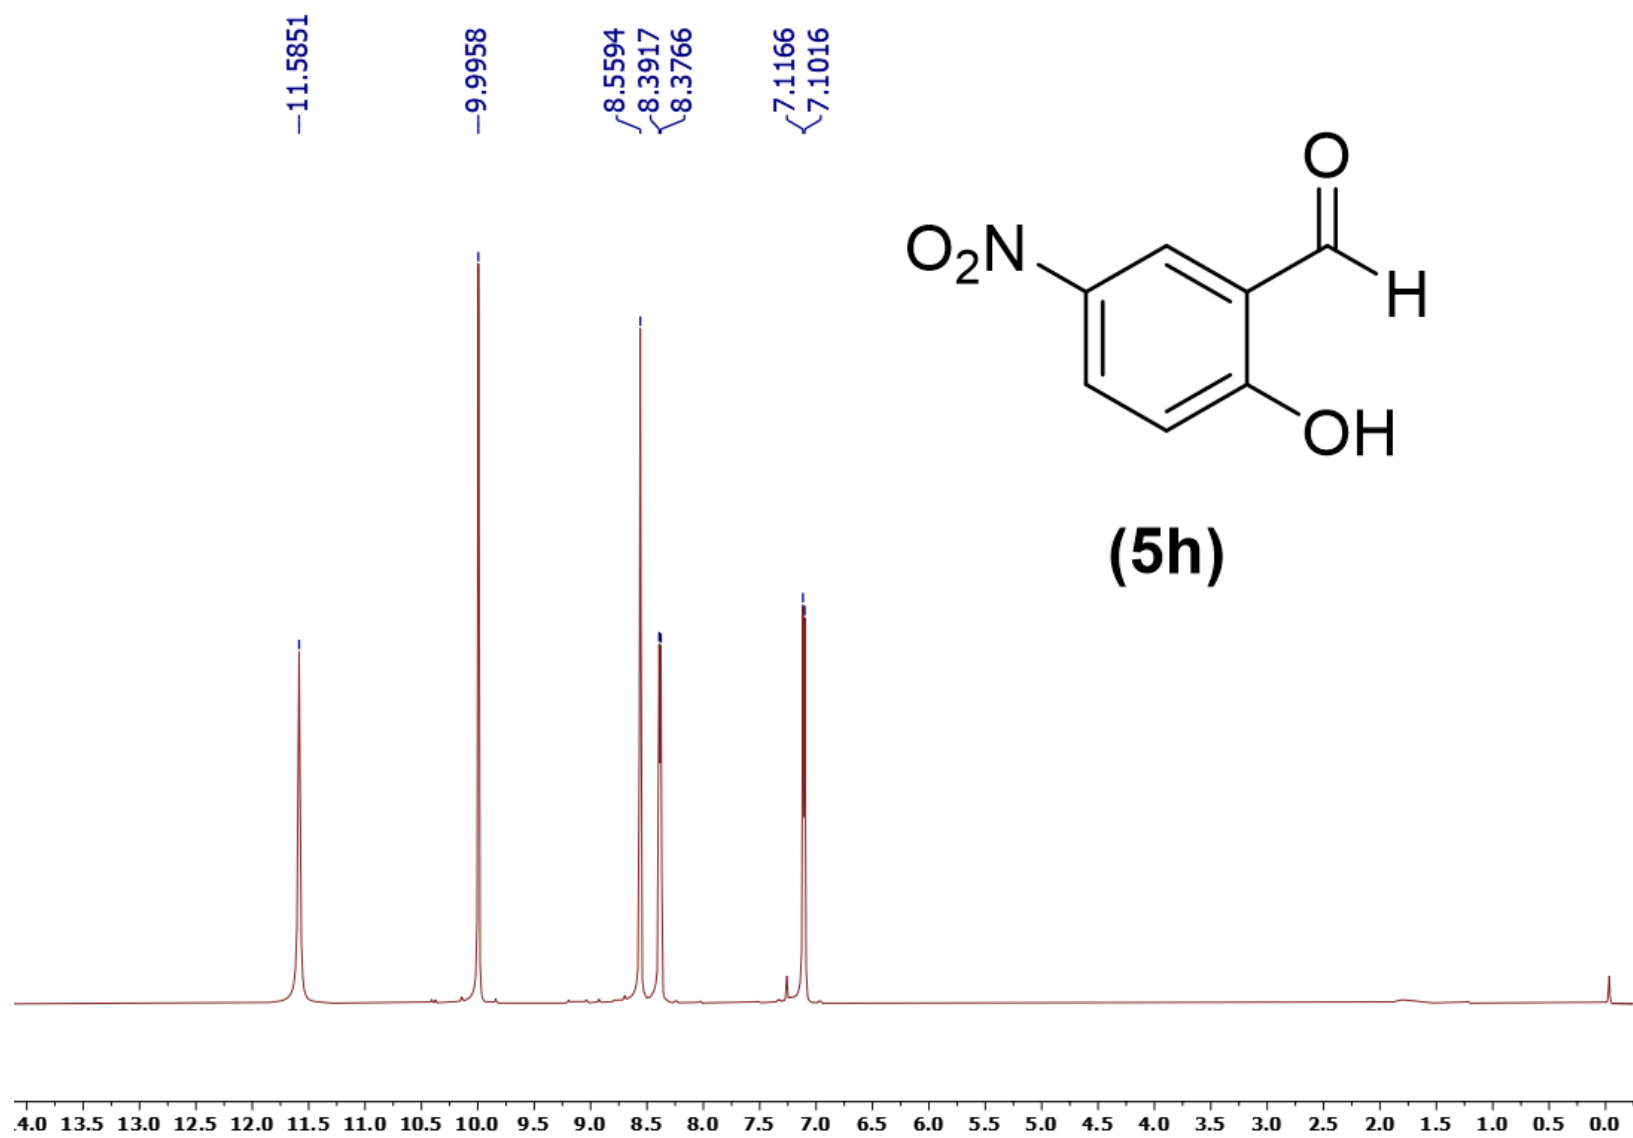

Figure S36.  $^1\text{H}$  NMR spectrum of **5h** in  $\text{CDCl}_3$ .

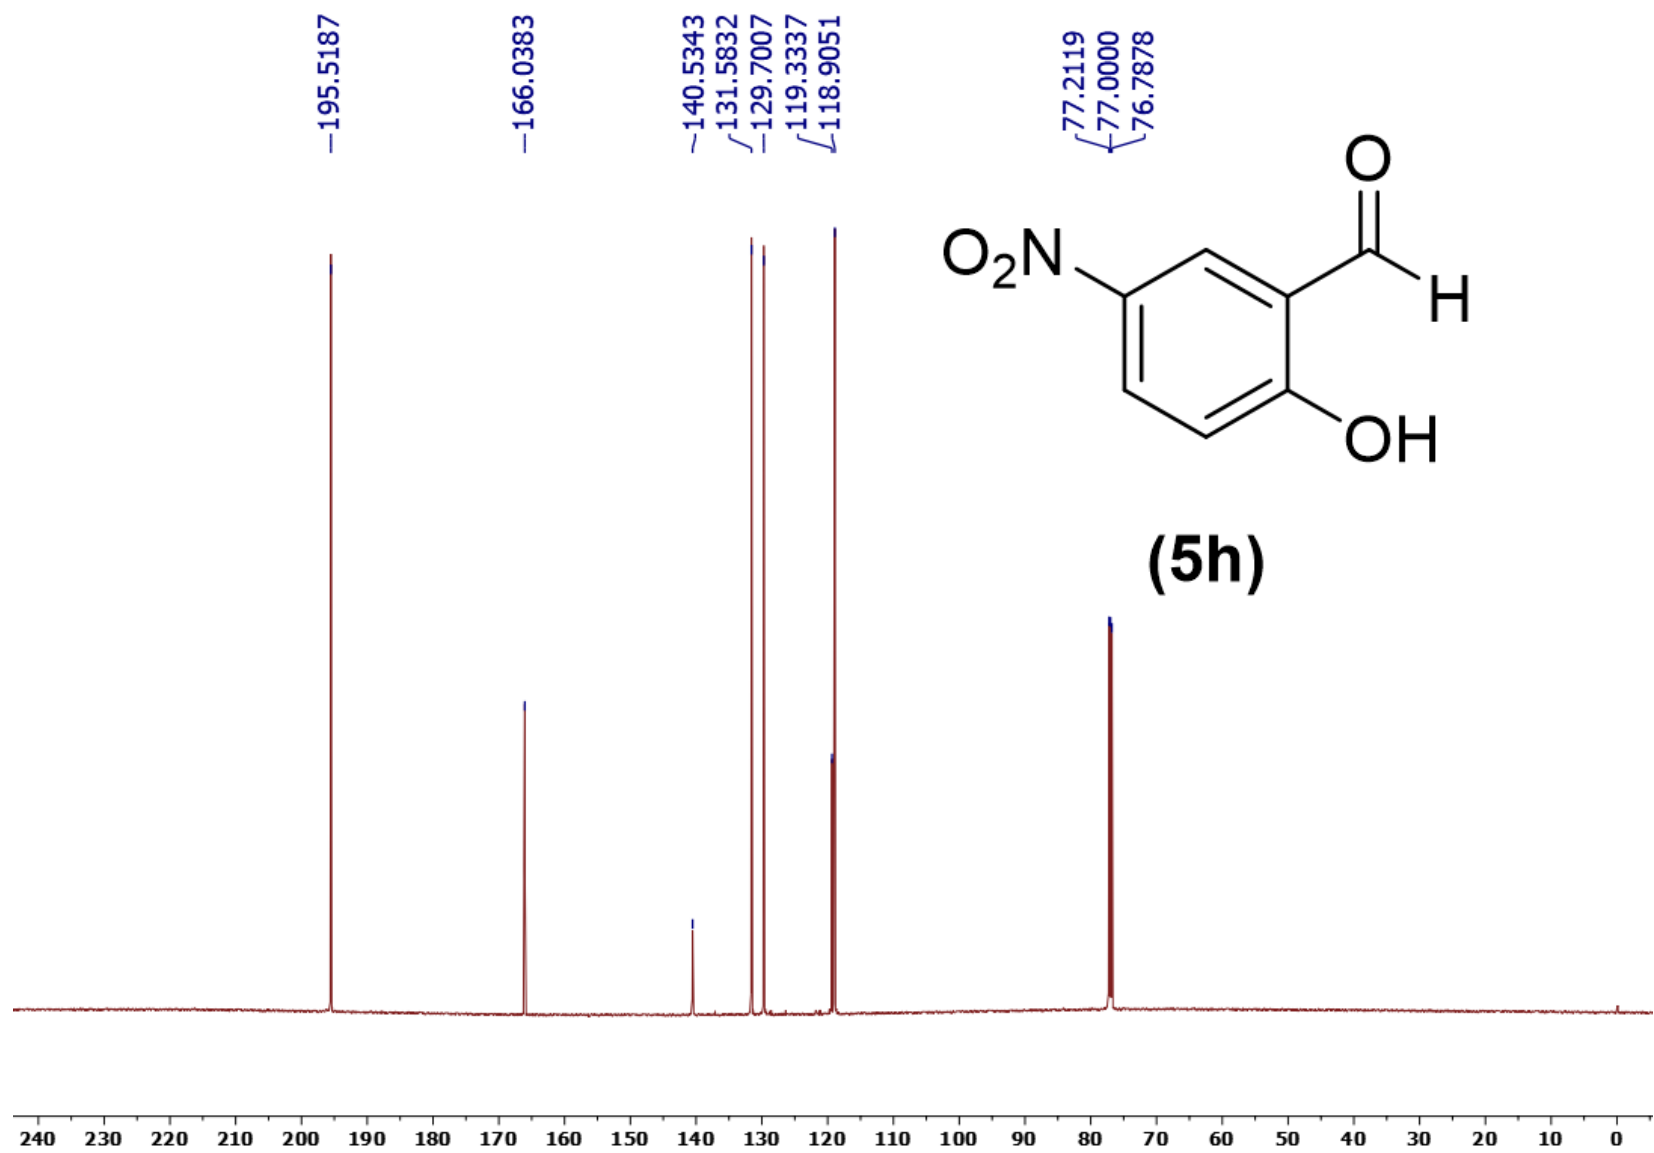

Figure S37.  $^{13}\text{C}\{^1\text{H}\}$  NMR spectrum of **5h** in  $\text{CDCl}_3$ .

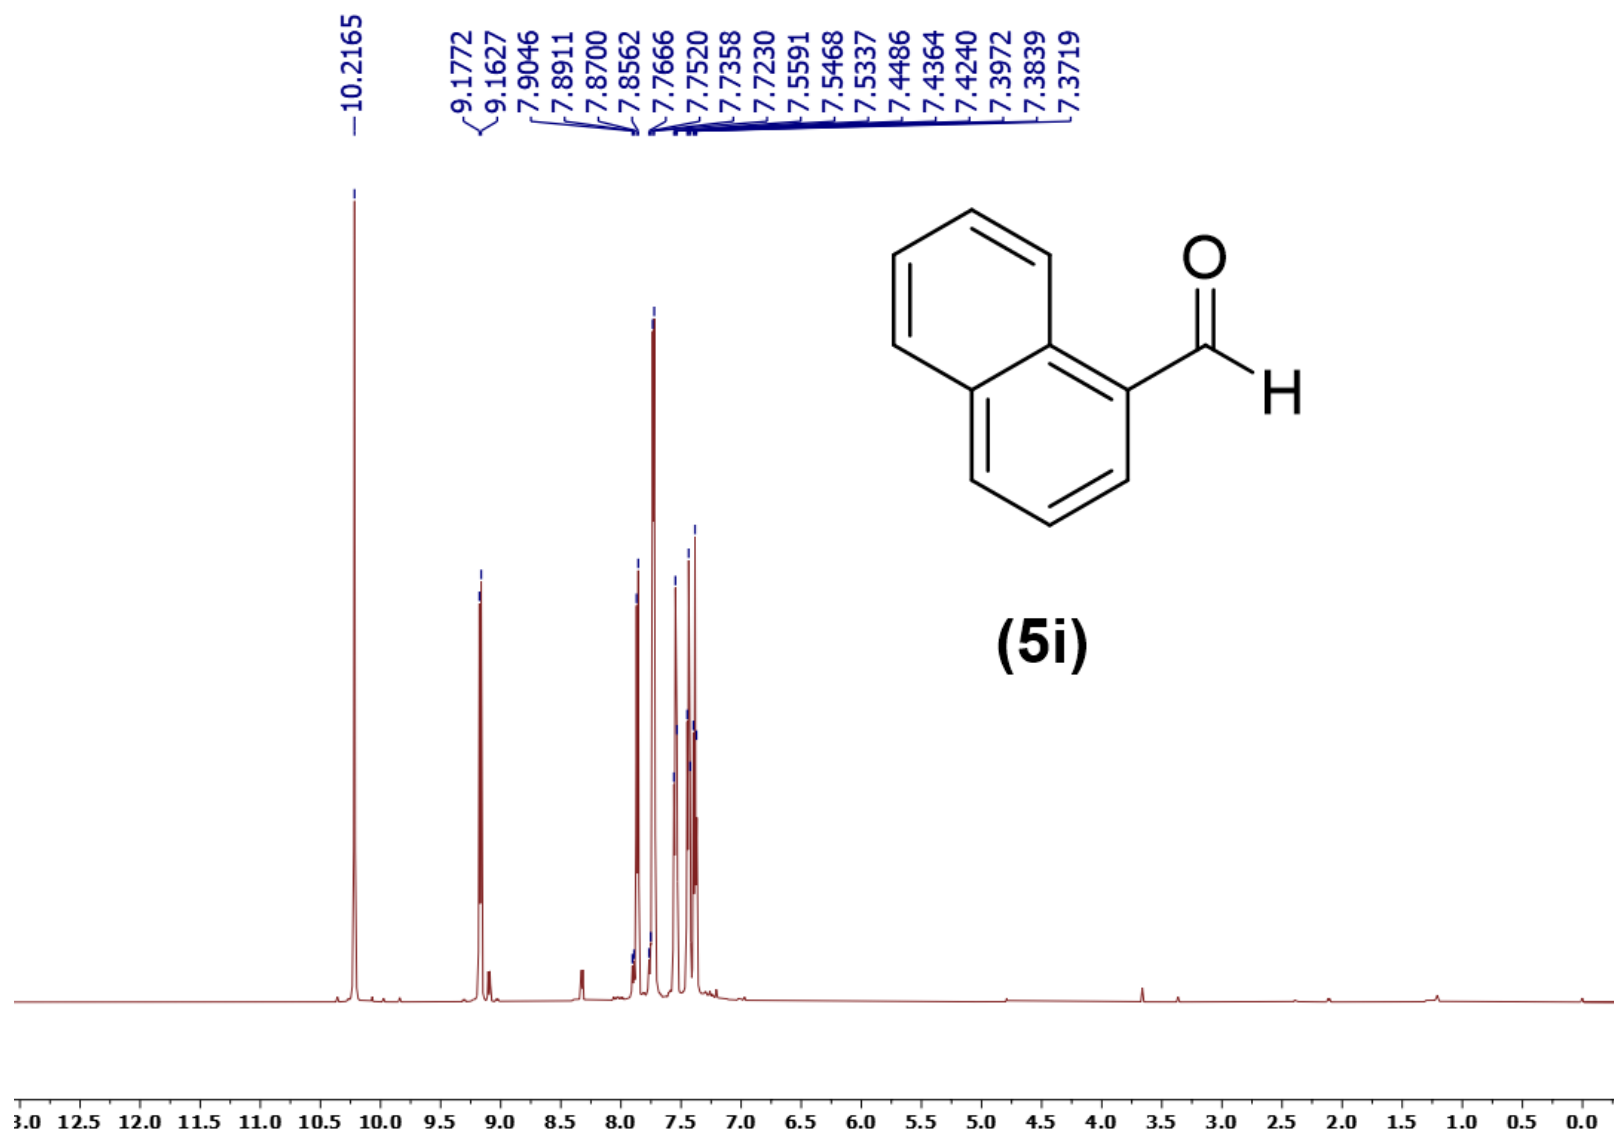

Figure S38.  $^1\text{H}$  NMR spectrum of **5i** in  $\text{CDCl}_3$ .



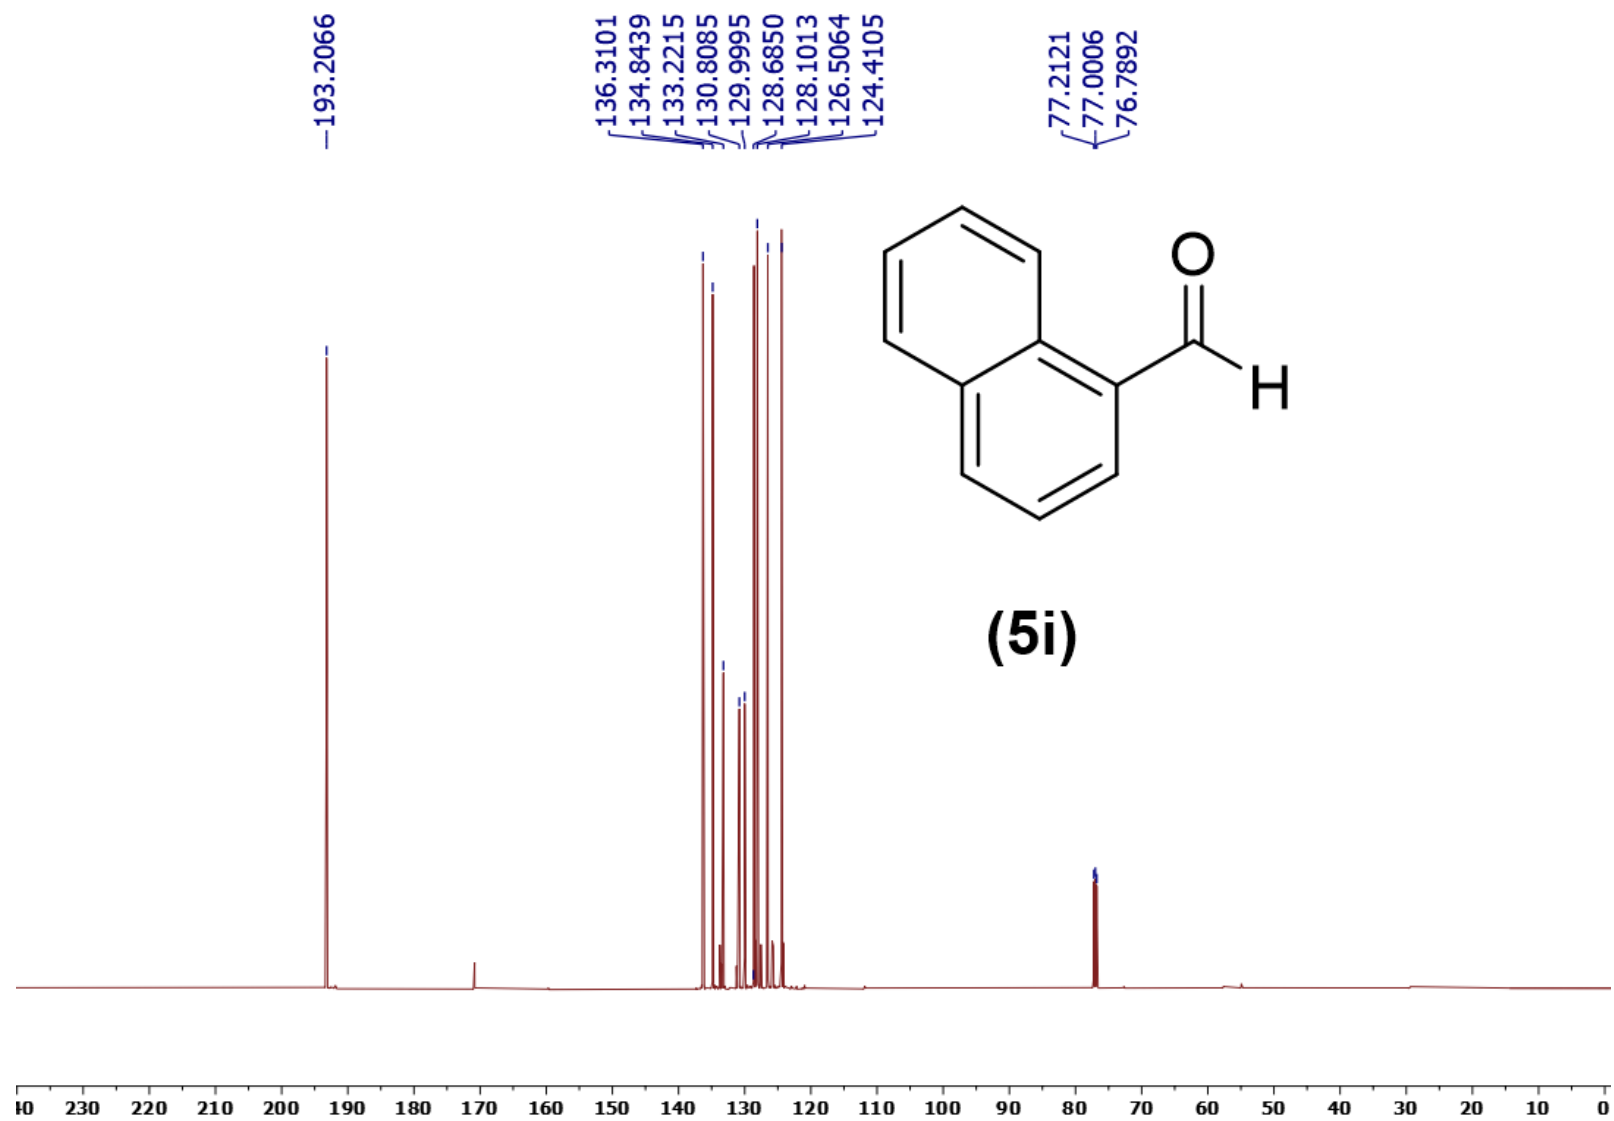

Figure S39.  $^{13}\text{C}\{^1\text{H}\}$  NMR spectrum of **5i** in  $\text{CDCl}_3$ .

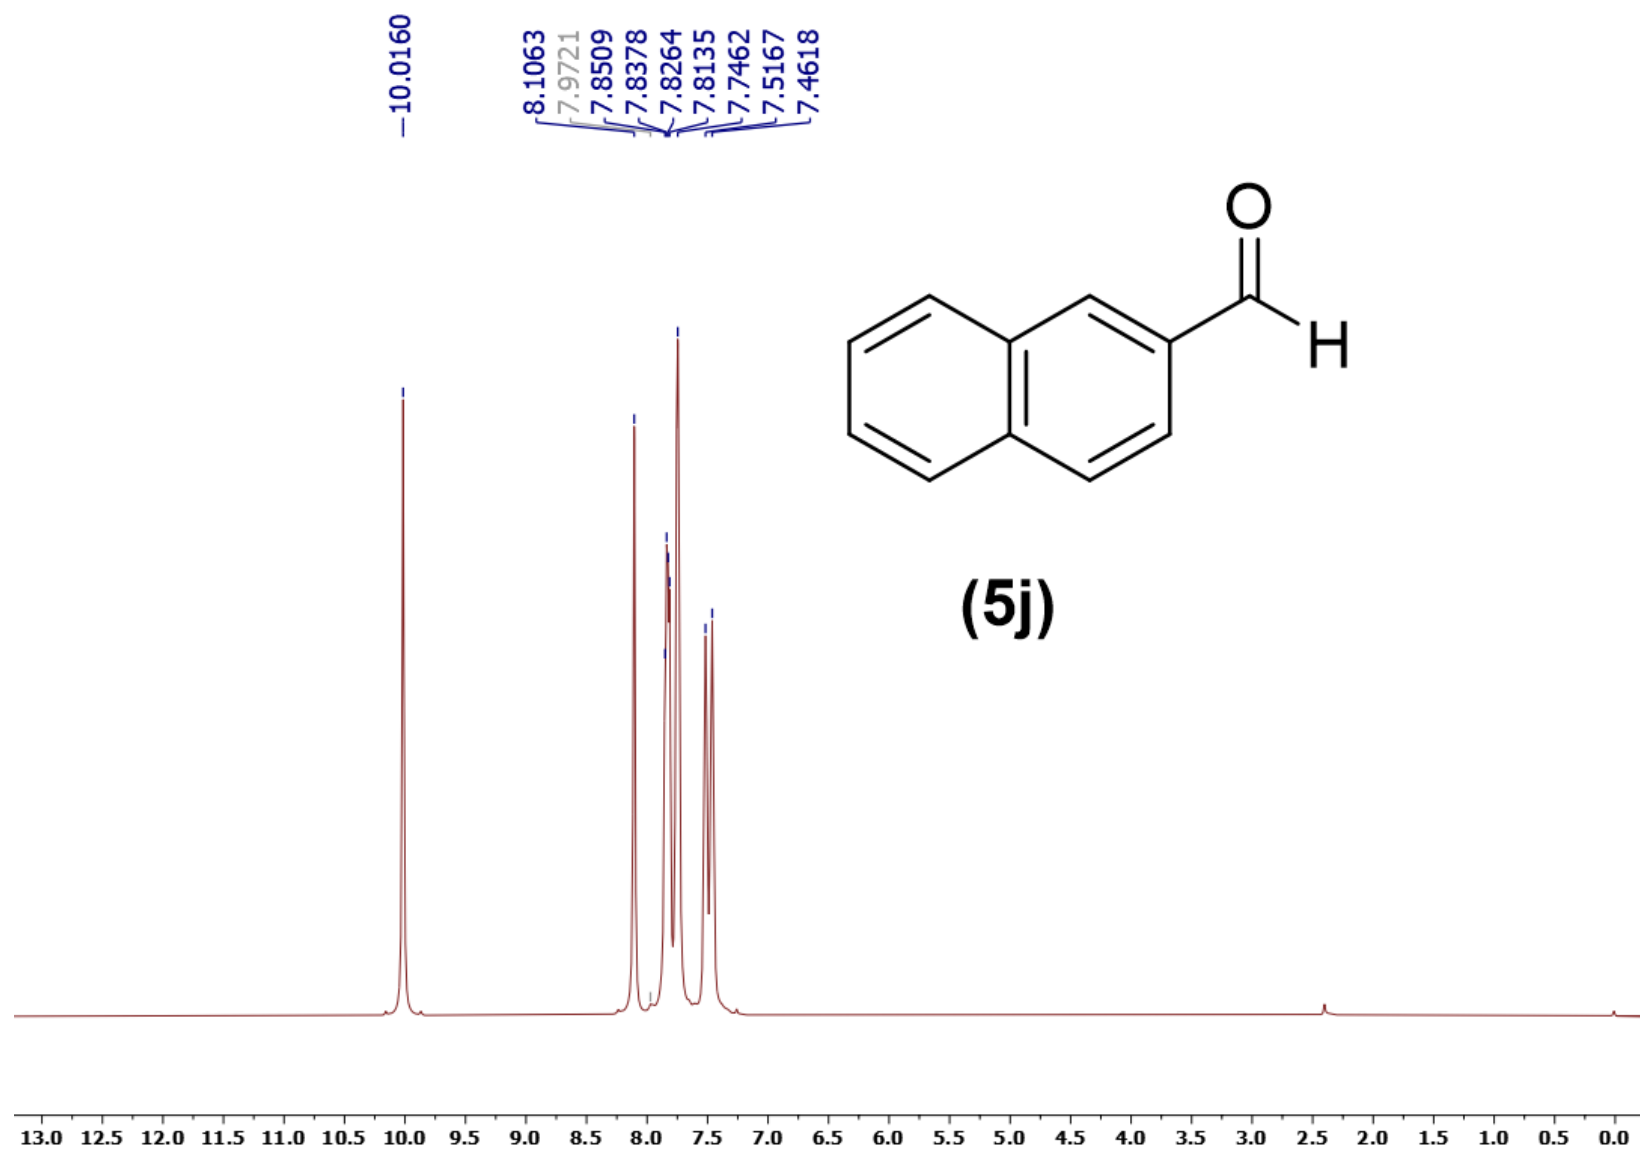

Figure S40.  $^1\text{H}$  NMR spectrum of **5j** in  $\text{CDCl}_3$ .

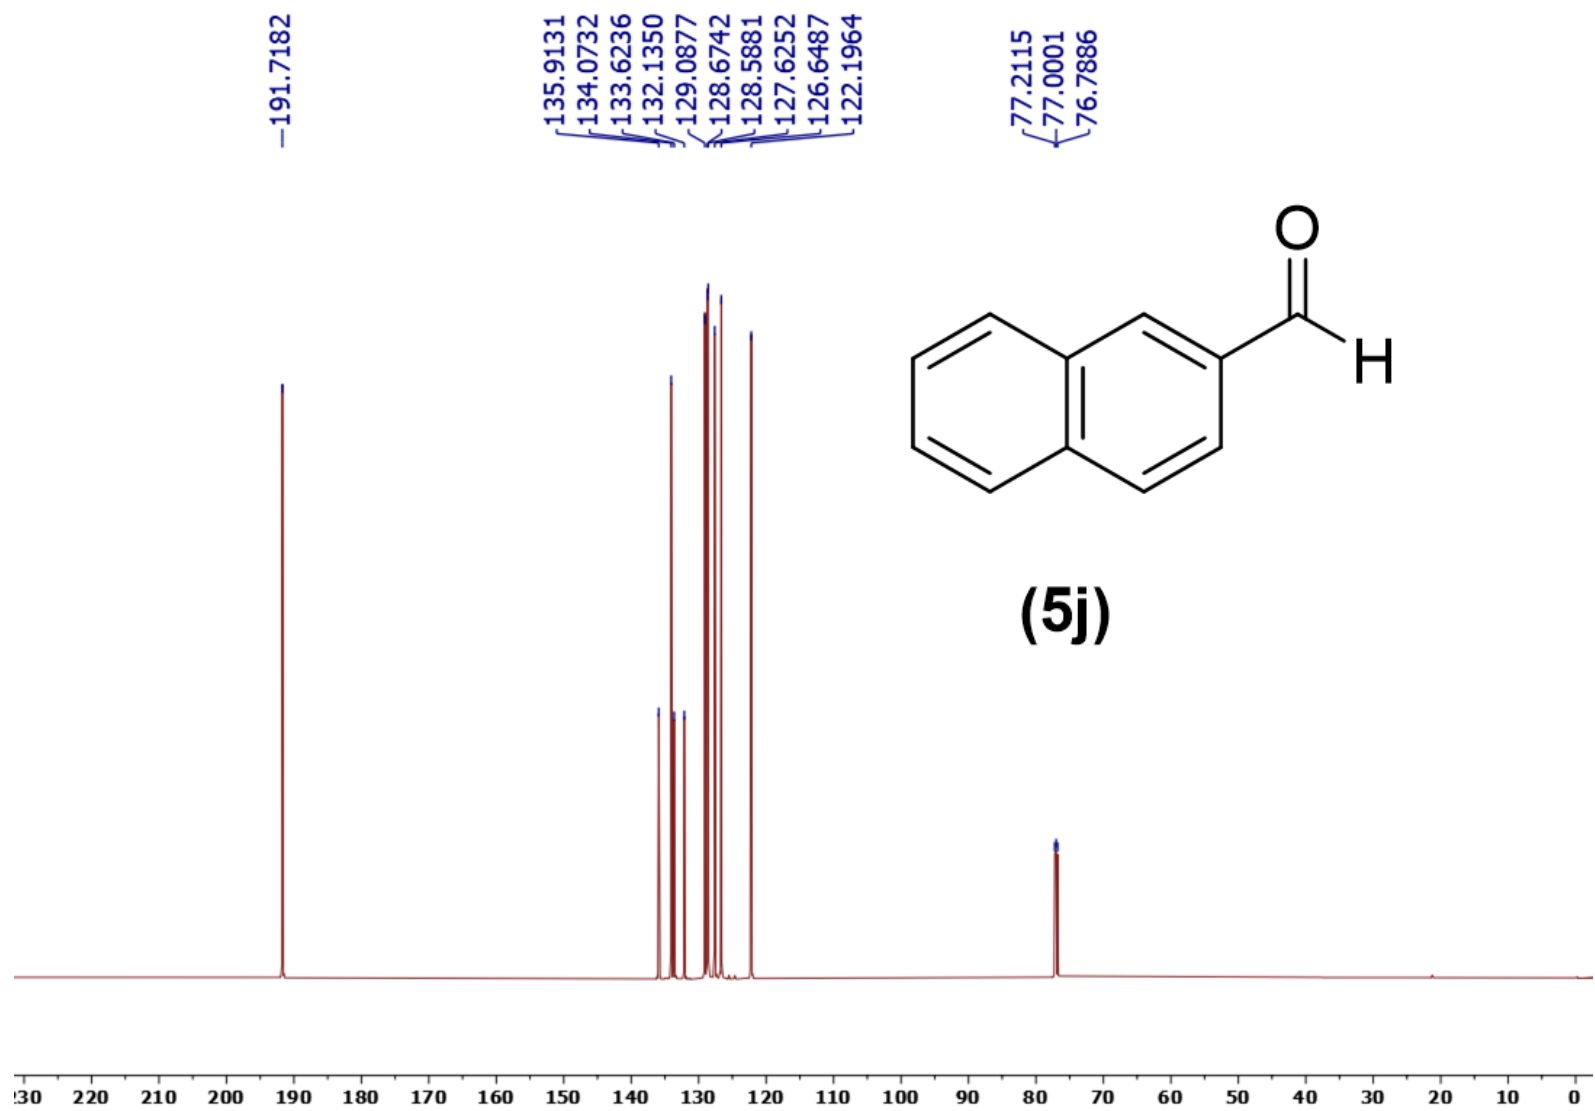

Figure S41.  $^{13}\text{C}\{^1\text{H}\}$  NMR spectrum of **5j** in  $\text{CDCl}_3$ .

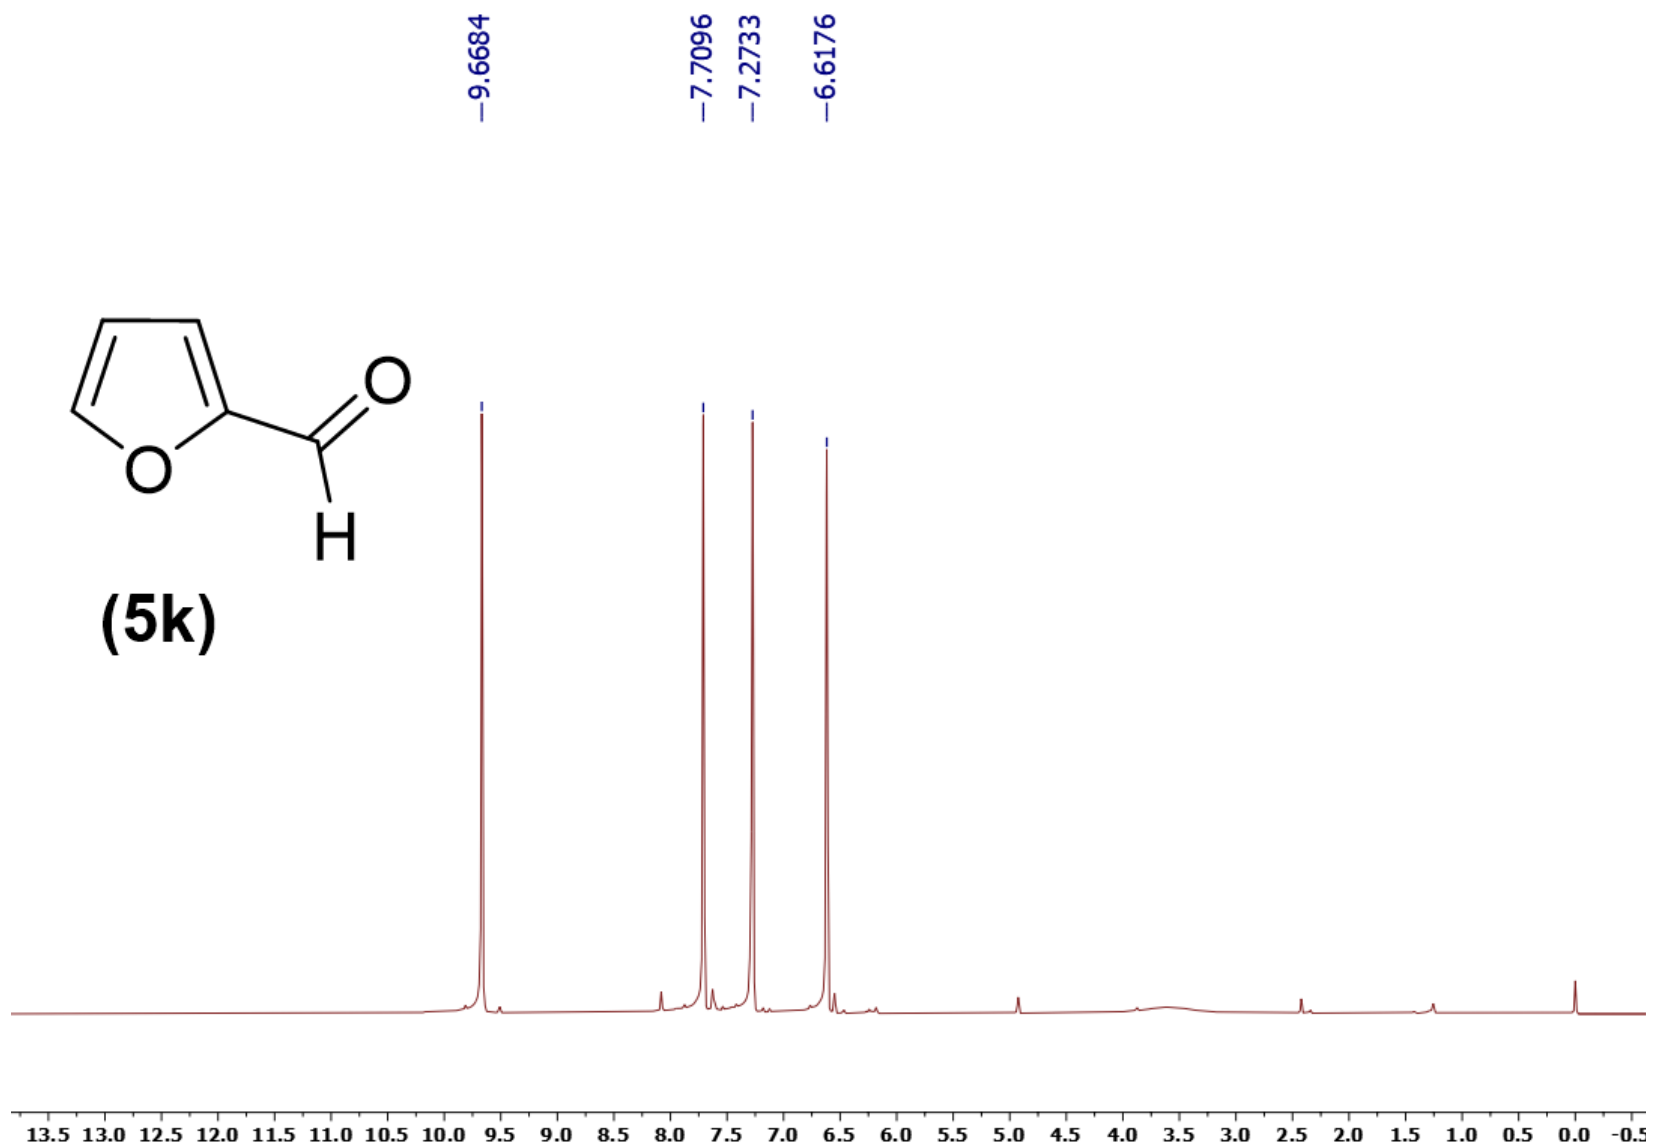

**Figure S42.** <sup>1</sup>H NMR spectrum of **5k** in CDCl<sub>3</sub>.

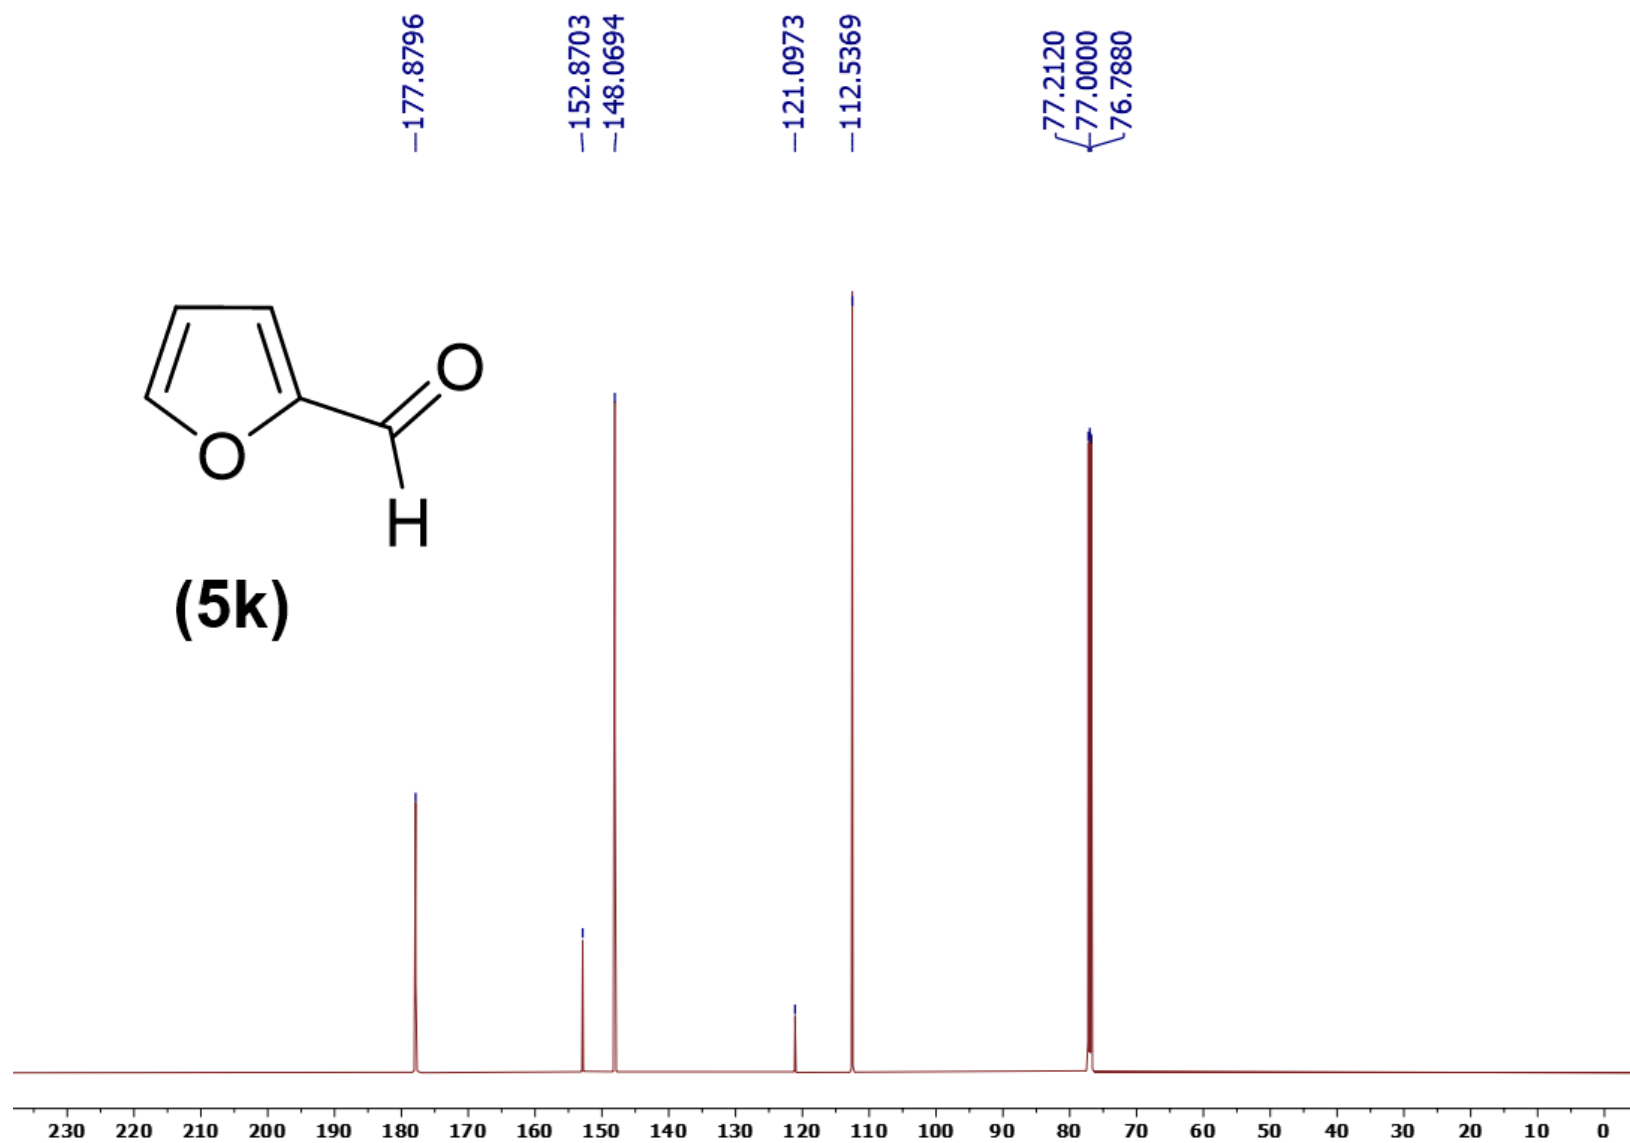

Figure S43.  $^{13}\text{C}\{^1\text{H}\}$  NMR spectrum of **5k** in  $\text{CDCl}_3$ .

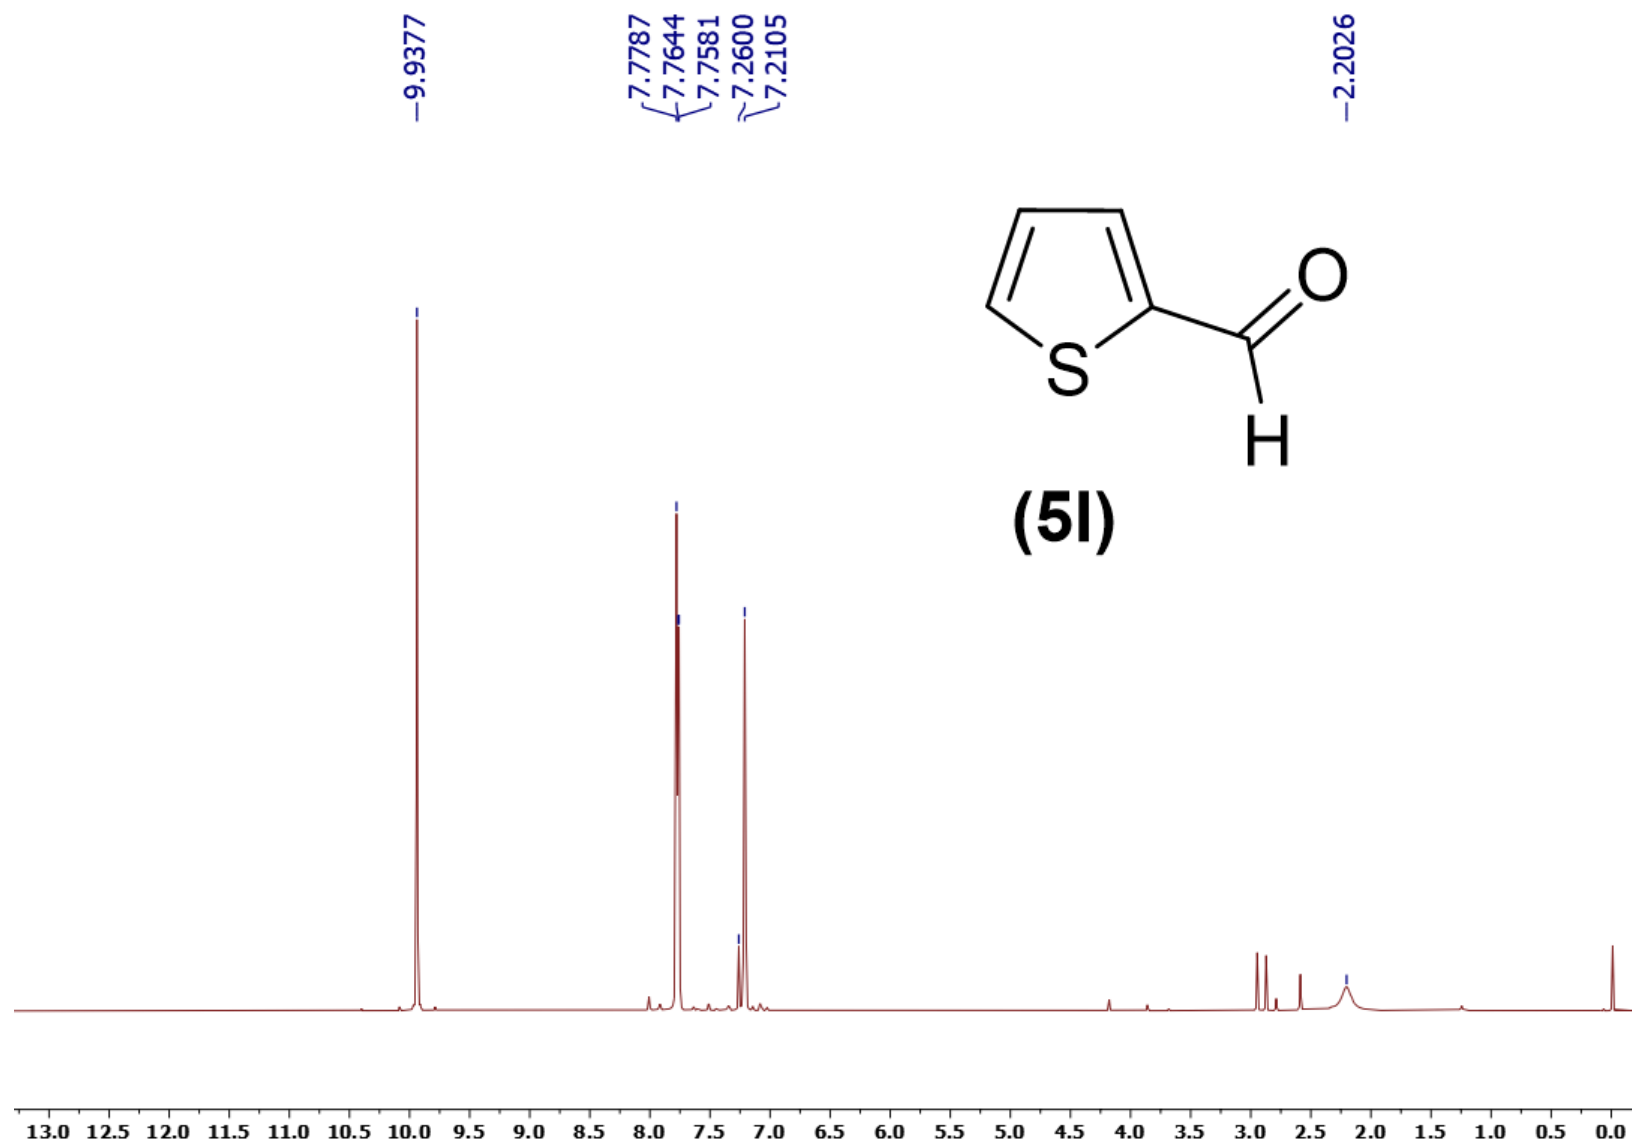

**Figure S44.** <sup>1</sup>H NMR spectrum of **5I** in CDCl<sub>3</sub>.

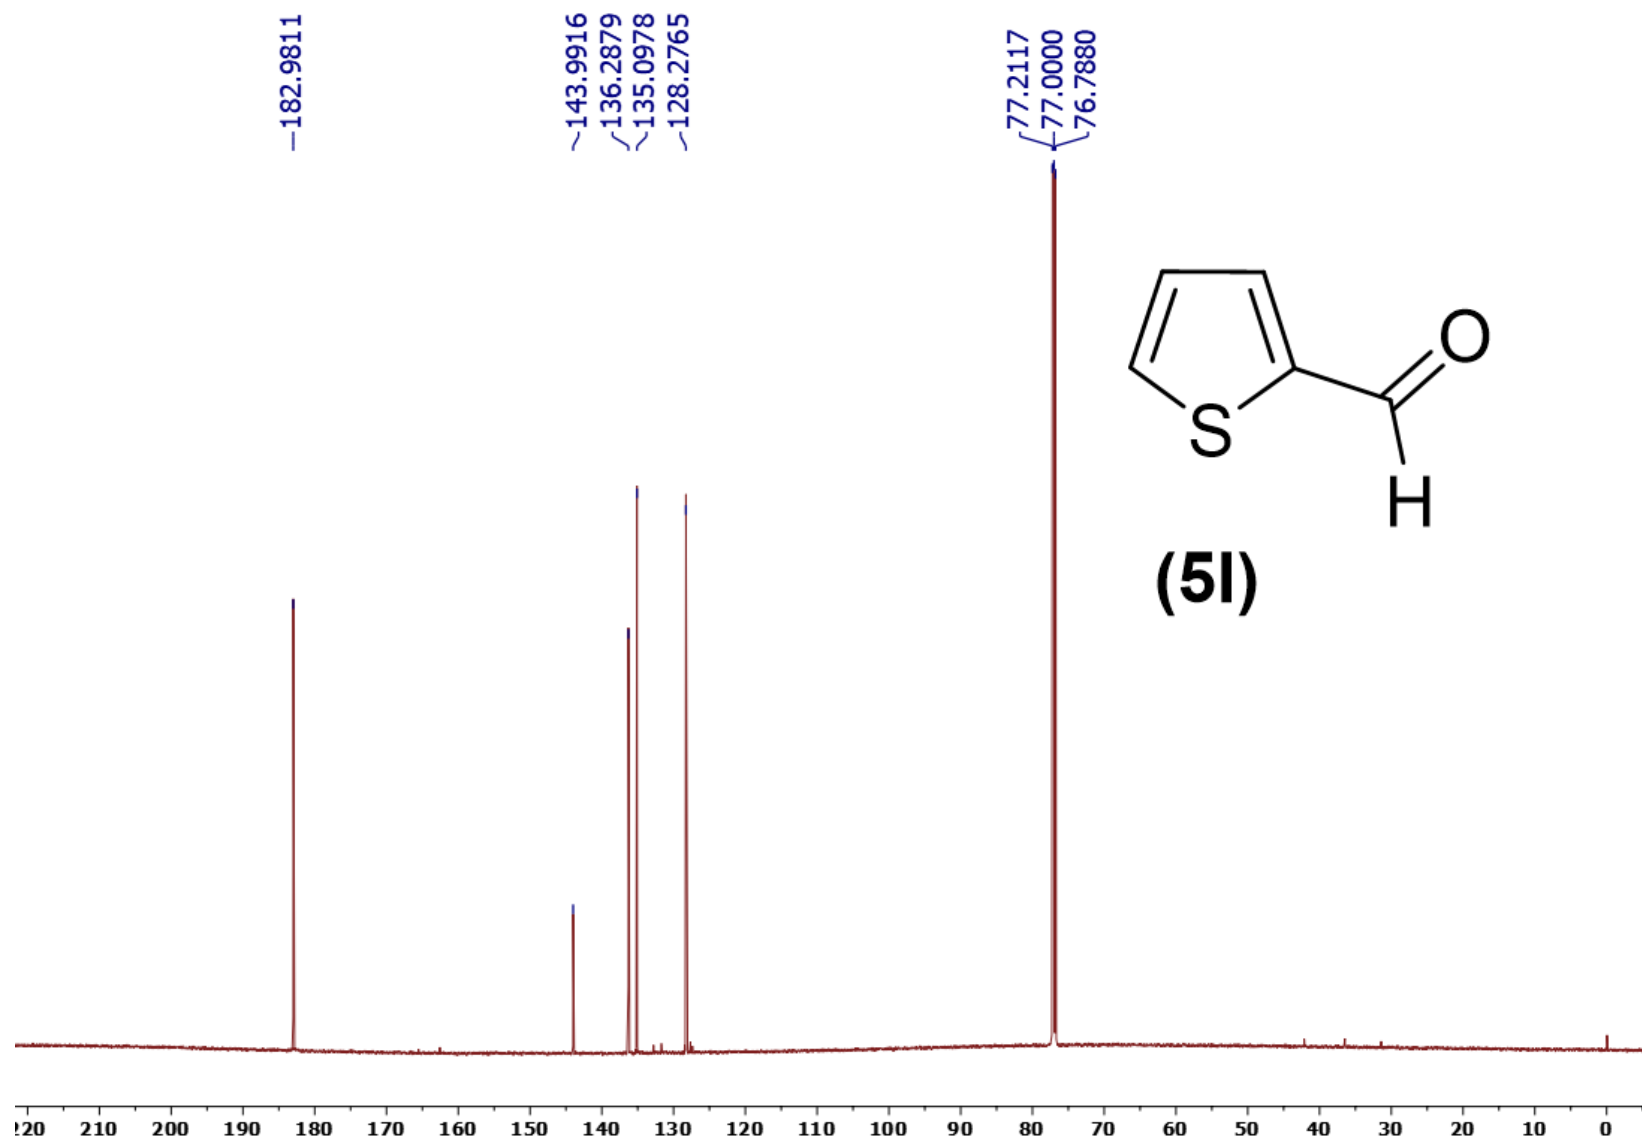

Figure S45.  $^{13}\text{C}\{^1\text{H}\}$  NMR spectrum of **5I** in  $\text{CDCl}_3$ .

## References:

1. (a) Zhang, J.; Gandelman, M.; Shimon, L. J. W.; Rozenberg, H.; Milstein, D. Electron-Rich, Bulky Ruthenium PNP-Type Complexes Acceptorless Catalytic Alcohol Dehydrogenation. *Organometallics* **2004**, *23*, 4026–4033. (b) Zhang, J.; Leitun, G.; Ben-David, Y.; Milstein, D. Facile Conversion of Alcohols into Esters and Dihydrogen Catalyzed by New Ruthenium Complexes. *J. Am. Chem. Soc.* **2005**, *127*, 10840–10841. (c) Dutta, I.; Sarbajna, A.; Pandey, P.; Rahaman, S. M. W.; Singh, K.; Bera, J. K. Acceptorless Dehydrogenation of Alcohols on a Diruthenium(II,II) Platform. *Organometallics* **2016**, *35*, 1505–1513. (d) Wang, Z.; Pan, B.; Liu, Q. B.; Yue, E. L.; Solan, G. A.; Ma, Y. P.; Sun, W.-H. Efficient Acceptorless Dehydrogenation of Secondary Alcohols to Ketones Mediated by a PNN-Ru(II) Catalyst. *Catal. Sci. Technol.* **2017**, *7*, 1654–1661. (e) Wang, Q.; Chai, H.; Yu, Z. Dimeric Ruthenium(II)- NNN Complex Catalysts Bearing a Pyrazolyl-Pyridylamino-Pyridine Ligand for Transfer Hydrogenation of Ketones and Acceptorless Dehydrogenation of Alcohols. *Organometallics* **2017**, *36*, 3638–3644. (f) Hao, Z.; Liu, K.; Feng, Q.; Dong, Q.; Ma, D.; Han, Z.; Lu, G.-L.; Lin, J. Ruthenium(II) Complexes Bearing Schiff Base Ligands for Efficient Acceptorless Dehydrogenation of Secondary Alcohols. *Chin. J. Chem.* **2021**, *39*, 121–128. (g) Komiya, N.; Nakae, T.; Sato, H.; Naota, T. Water-Soluble Diruthenium Complexes Bearing Acetate and Carbonate Bridges: Highly Efficient Catalysts for Aerobic Oxidation of Alcohols in Water. *Chem. Commun.* **2007**, 4829–4831.
2. Han, L.; Xing, P.; Jiang, B. Selective Aerobic Oxidation of Alcohols to Aldehydes, Carboxylic Acids, and Imines Catalyzed by a Ag-NHC Complex. *Org. Lett.* 2014, *16*, 3428–3431.
